# Supplementary material for: Palladium-catalyzed enantioselective arylation of trichloro- or tri-/difluoroacetaldimine precursors
Source: Royal Society of Chemistry journal article supplement (doi:10.1039/d4cc00022f), 2024-01-01

# **Palladium-Catalyzed Enantioselective Arylation of Trichloroacetaldimine or Tri-/Difluoro- Precursors**

**Supporting Information**

## Table of Contents

|                                                                              |     |
|------------------------------------------------------------------------------|-----|
| General remarks .....                                                        | S3  |
| General procedure for chiral $\alpha$ -aryl trichloroethylamines .....       | S3  |
| Characterization data of chiral $\alpha$ -aryl trichloroethylamines.. ..     | S3  |
| General procedure for synthesis of boroxines .....                           | S21 |
| Preparation of trichloromethyl imine and asymmetric arylation reaction ..... | S21 |
| Gram-scale reaction .....                                                    | S21 |
| Transformation of $\alpha$ -aryl trichloroethylamines .....                  | S22 |
| Mechanism study .....                                                        | S23 |
| Crystal structure of 3a .....                                                | S24 |
| References .....                                                             | S26 |
| NMR spectra .....                                                            | S27 |

## General remarks

All the manipulations were performed in air, unless mentioned otherwise. *n*-Hexane, 1,2-dichloroethane were purchased from J&K Chemicals and used without further purification. The following chemicals were purchased and used as received: AgSbF<sub>6</sub> (Energy Chemicals), Pd (TFA)<sub>2</sub> (99%, Sigma-Aldrich), (*S*)-<sup>t</sup>Bu-PyOX (99%, Bide Chemicals). All *N*, *O*-acetals<sup>1</sup> and boroxine<sup>2</sup> were prepared by literature report procedure.

<sup>1</sup>H, <sup>13</sup>C, <sup>19</sup>F NMR spectra were recorded using Agilent Technologies 600 MHz NMR, Bruker 400 MHz and 600 MHz NMR spectrometer. <sup>1</sup>H NMR and <sup>13</sup>C NMR spectra were referenced to resonances of the residual protons in the deuterated solvents. Multiplicities are recorded as: s = singlet, d = doublet, t = triplet, dd = doublet of doublets, dt = doublet of triplets, br = broad singlet and m = multiplet. HR-MS analyses were performed at a Thermo Scientific Exactive-TOF (ESI ionization source). Optical rotation were measured on a commercial polarimeter and reported as follows: [α]<sub>D</sub><sup>25</sup> (c = g/100 mL, solvent). Enantiomeric ratios were determined by HPLC using Agilent technologies 1260 infinity, using *n*-hexane/*i*-PrOH as a mobile phase and detected by UV at 254~210 nm.

## General procedure for chiral α-aryl trichloroethylamines

In a flame dried round bottom flask, Pd (TFA)<sub>2</sub> (1.7 mg, 0.005 mmol), (*S*)-<sup>t</sup>Bu-PyOX (1.2 mg, 0.006 mmol), AgSbF<sub>6</sub> (6.7 mg, 0.02 mmol), *N*, *O*-acetal (0.10 mmol), boroxine (0.20 mmol) and DCE (1 mL) were added under air. The reaction mixture was stirred at 70 °C for 12 h and the resulting solution was concentrated in vacuum. The crude product was purified by column chromatography on silica gel with a mixture of ethyl acetate and hexane (1:30 - 1:5) as eluent, and data for characterization of the products are listed below.

## Characterization and HPLC data of chiral α-aryl trichloroethylamines

### (9*H*-fluoren-9-yl)methyl-(*S*)-(2,2,2-trichloro-1-phenylethyl)carbamate (**3a**)

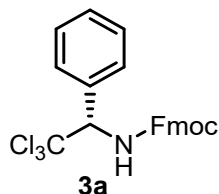

The title compound was isolated [(*S*)-**3a**: 36.6 mg, 82%, 98% *ee*; (*R*)-**3a**: 35.7 mg,

80%, 99% *ee*] as a white solid flash chromatography on silica gel (Hexane/EtOAc = 25:1). <sup>1</sup>H NMR (600 MHz, CDCl<sub>3</sub>) δ 7.77 (d, *J* = 7.6 Hz, 2H), 7.58 (dd, *J* = 7.8, 4.0 Hz, 2H), 7.54 – 7.49 (m, 2H), 7.44 – 7.37 (m, 5H), 7.30 (q, *J* = 7.1 Hz, 2H), 5.89 (d, *J* = 10.4 Hz, 1H), 5.65 (d, *J* = 10.3 Hz, 1H), 4.59 (dd, *J* = 10.9, 6.8 Hz, 1H), 4.38 (dd, *J* = 10.9, 6.9 Hz, 1H), 4.24 (t, *J* = 6.7 Hz, 1H). <sup>13</sup>C NMR (151 MHz, CDCl<sub>3</sub>) δ 155.4, 143.7, 141.4, 134.8, 129.44, 129.39, 128.4, 127.9, 127.2, 125.2, 120.2, 101.7, 69.2, 67.5, 47.3. HRMS (ESI) calcd for C<sub>23</sub>H<sub>18</sub>Cl<sub>3</sub>NO<sub>2</sub>Na<sup>+</sup>: 468.0295, found 468.0304.

Optical rotation: [α]<sub>D</sub><sup>25</sup> = 0.53 [c = 0.06, CH<sub>2</sub>Cl<sub>2</sub> (*S*)].

**HPLC condition:** Chiral column OD-3, *n*-hexane/*i*-PrOH = 90:10, flow rate = 1.0 mL/min, wavelength = 210 nm, (*S*)-**3a**: *t*<sub>R</sub> = 15.7 min for the major isomer, *t*<sub>R</sub> = 21.8 min for the minor isomer; (*R*)-**3a**: *t*<sub>R</sub> = 21.5 min for the major isomer, *t*<sub>R</sub> = 15.8 min for the minor isomer.

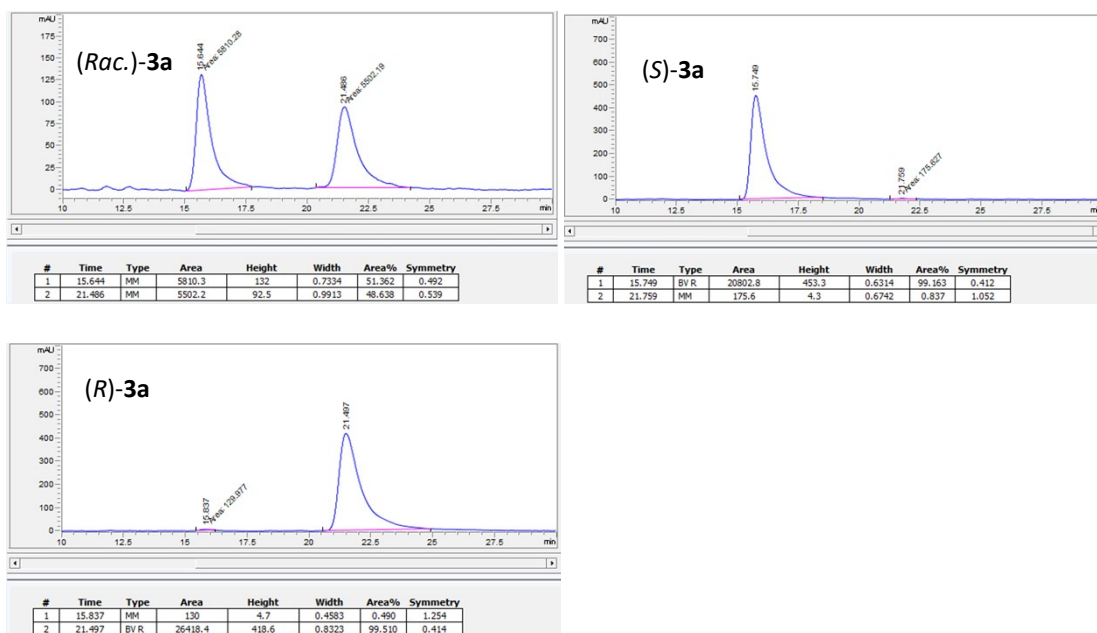

**(9H-fluoren-9-yl)methyl-(S)-(2,2,2-trichloro-1-(4-fluorophenyl)ethyl)carbamate (3b)**

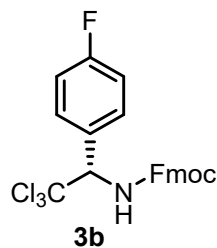

The title compound was isolated [(*S*)-**3b**: 36.2 mg, 78%, 98% *ee*; (*R*)-**3b**: 34.8 mg, 75%, 99% *ee*] as a white solid flash chromatography on silica gel (Hexane/EtOAc = 25:1). <sup>1</sup>H NMR (600 MHz, CDCl<sub>3</sub>) δ 7.77 (d, *J* = 7.6 Hz, 2H), 7.57 (t, *J* = 6.7 Hz, 2H), 7.48 (dd, *J* = 8.5, 5.0 Hz, 2H), 7.40 (t, *J* = 7.6 Hz, 2H), 7.30 (t, *J* = 7.6 Hz, 2H), 7.08 (t, *J* = 8.4 Hz, 2H), 5.85 (d, *J* = 10.2 Hz, 1H), 5.63 (d, *J* = 10.0 Hz, 1H), 4.63 – 4.57 (m, 1H), 4.40 (dd, *J* = 11.0, 6.5 Hz, 1H), 4.23 (t, *J* = 6.6 Hz, 1H). <sup>13</sup>C NMR (151 MHz, CDCl<sub>3</sub>) δ 163.2 (d, *J* = 249.0 Hz), 155.4, 143.6, 141.5, 131.2 (d, *J* = 8.6 Hz), 130.8, 127.9, 127.2, 125.1, 120.2, 115.4 (d, *J* = 21.8 Hz), 101.5, 68.6, 67.5, 47.3. <sup>19</sup>F NMR (564 MHz, CDCl<sub>3</sub>) δ -112.02. HRMS (ESI) calcd for C<sub>23</sub>H<sub>17</sub>Cl<sub>3</sub>FNO<sub>2</sub>Na<sup>+</sup>: 486.0201, found 486.0203.

Optical rotation: [α]<sub>D</sub><sup>25</sup> = 0.83 [c = 0.03, CH<sub>2</sub>Cl<sub>2</sub> (*S*)].

**HPLC condition:** Chiral column IC, n-hexane/*i*-PrOH = 97:3, flow rate = 1.0 mL/min, wavelength = 254 nm, (*S*)-**3b**: *t*<sub>R</sub> = 11.1 min for the major isomer, *t*<sub>R</sub> = 10.4 min for the minor isomer; (*R*)-**3b**: *t*<sub>R</sub> = 10.3 min for the major isomer, *t*<sub>R</sub> = 11.2 min for the minor isomer.

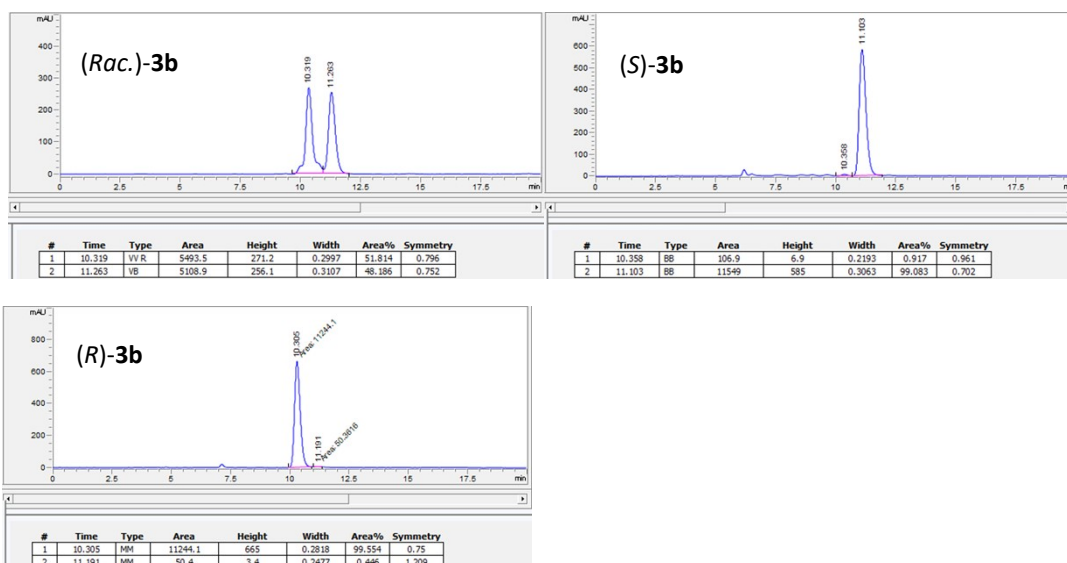

**(9H-fluoren-9-yl)methyl-(S)-(2,2,2-trichloro-1-(4-chlorophenyl)ethyl)carbamate (3c)**

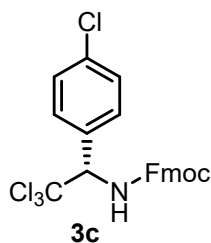

The title compound was isolated [(*S*)-**3c**: 32.2 mg, 67%, 96% *ee*; (*R*)-**3c**: 32.7 mg,

68%, 96% *ee*] as a buff solid flash chromatography on silica gel (Hexane/EtOAc = 25:1). <sup>1</sup>H NMR (600 MHz, CDCl<sub>3</sub>) δ 7.78 (d, *J* = 7.6 Hz, 2H), 7.58 (t, *J* = 7.2 Hz, 2H), 7.47 – 7.39 (m, 4H), 7.36 (d, *J* = 8.1 Hz, 2H), 7.30 (t, *J* = 7.6 Hz, 2H), 5.96 (d, *J* = 10.1 Hz, 1H), 5.64 (d, *J* = 10.2 Hz, 1H), 4.61 (dd, *J* = 10.8, 6.5 Hz, 1H), 4.42 (dd, *J* = 10.8, 6.7 Hz, 1H), 4.23 (t, *J* = 6.6 Hz, 1H). <sup>13</sup>C NMR (151 MHz, CDCl<sub>3</sub>) δ 155.4, 143.6, 141.4, 135.4, 133.3, 130.7, 128.6, 127.9, 127.2, 125.1, 120.2, 101.2, 68.6, 67.4, 47.2. HRMS (ESI) calcd for C<sub>23</sub>H<sub>17</sub>Cl<sub>4</sub>NO<sub>2</sub>Na<sup>+</sup>: 501.9906, found 501.9908.

Optical rotation: [α]<sub>D</sub><sup>25</sup> = 0.60 [c = 0.03, CH<sub>2</sub>Cl<sub>2</sub> (S)].

**HPLC condition:** Chiral column IC, n-hexane/*i*-PrOH = 97:3, flow rate = 1.0 mL/min, wavelength = 254 nm, (*S*)-**3c**: *t*<sub>R</sub> = 11.9 min for the major isomer, *t*<sub>R</sub> = 10.8 min for the minor isomer; (*R*)-**3c**: *t*<sub>R</sub> = 10.9 min for the major isomer, *t*<sub>R</sub> = 12.2 min for the minor isomer.

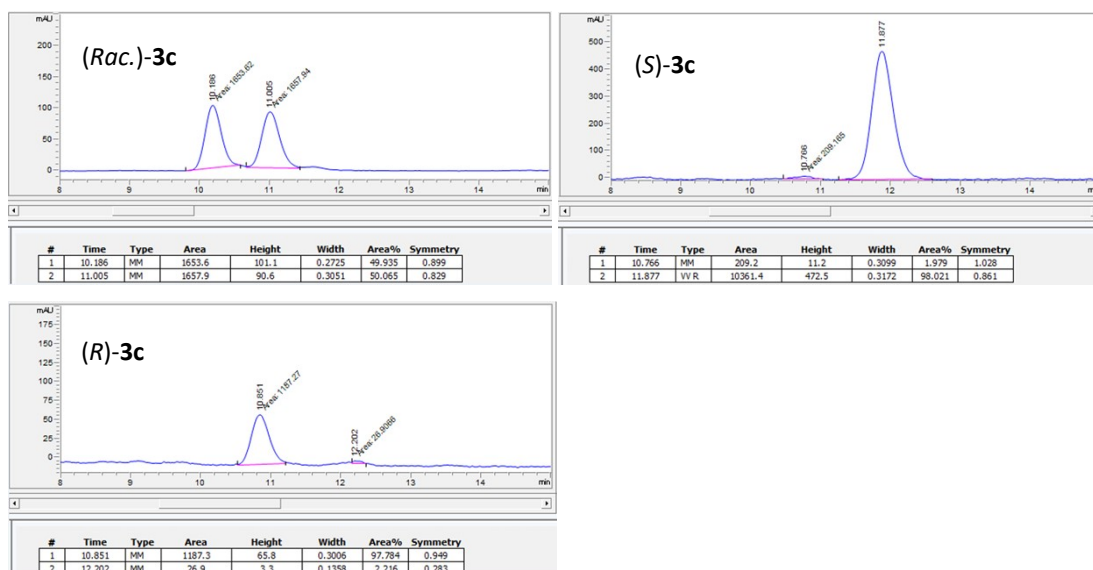

**(9H-fluoren-9-yl)methyl-(S)-(1-(4-bromophenyl)-2,2,2-trichloroethyl)carbamate (3d)**

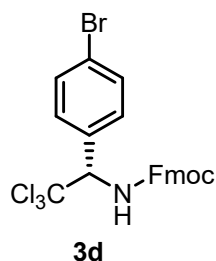

The title compound was isolated [(*S*)-**3d**: 26.2 mg, 50%, 97% *ee*; (*R*)-**3d**: 26.7 mg, 51%, 97% *ee*] as a yellow solid flash chromatography on silica gel (Hexane/EtOAc = 25:1). <sup>1</sup>H NMR (600 MHz, CDCl<sub>3</sub>) δ 7.77 (d, *J* = 7.6 Hz, 2H), 7.61 – 7.47 (m, 4H), 7.45 – 7.34 (m, 4H), 7.30 (t, *J* = 7.6 Hz, 2H), 5.87 (d, *J* = 10.2 Hz, 1H), 5.61 (d, *J* = 10.2 Hz, 1H), 4.65 – 4.53 (m, 1H), 4.48 – 4.34 (m, 1H), 4.22 (t, *J* = 6.7 Hz, 1H). <sup>13</sup>C NMR (151 MHz, CDCl<sub>3</sub>) δ 155.3, 143.6, 141.5, 133.9, 131.5, 131.0, 127.9, 127.2, 125.1, 123.7, 120.2, 101.1, 68.7, 67.4, 47.3. HRMS (ESI) calcd for C<sub>23</sub>H<sub>17</sub>Cl<sub>3</sub>BrNO<sub>2</sub>Na<sup>+</sup>: 545.9400, found 545.9405.

Optical rotation: [α]<sub>D</sub><sup>25</sup> = 0.61 [c = 0.08, CH<sub>2</sub>Cl<sub>2</sub> (*S*)].

**HPLC condition:** Chiral column IC, n-hexane/*i*-PrOH = 97:3, flow rate = 1.0 mL/min, wavelength = 254 nm, (*S*)-**3d**: *t*<sub>R</sub> = 12.5 min for the major isomer, *t*<sub>R</sub> = 11.4 min for the minor isomer; (*R*)-**3d**: *t*<sub>R</sub> = 11.3 min for the major isomer, *t*<sub>R</sub> = 12.6 min for the minor isomer.

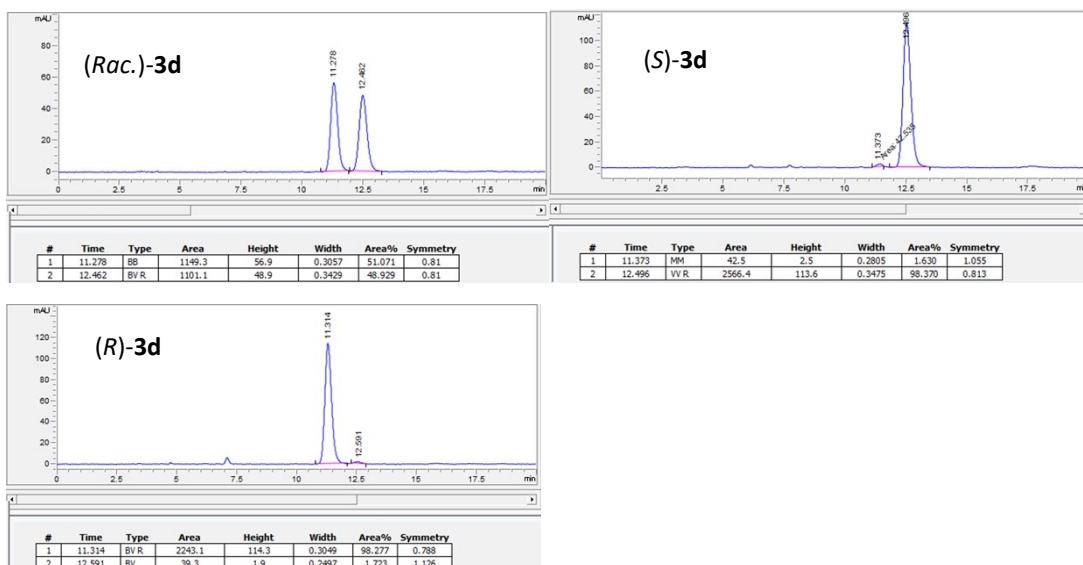

**(9H-fluoren-9-yl)methyl-(S)-(2,2,2-trichloro-1-(p-tolyl)ethyl)carbamate (3e)**

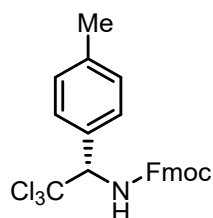

**3e**

The title compound was isolated [(*S*)-**3e**: 35.9 mg, 78%, 98% *ee*; (*R*)-**3e**: 34.5 mg, 75%, 97% *ee*] as a white solid flash chromatography on silica gel (Hexane/EtOAc = 25:1). <sup>1</sup>H NMR (600 MHz, CDCl<sub>3</sub>) δ 7.78 (d, *J* = 7.6 Hz, 2H), 7.60 (t, *J* = 6.4 Hz, 2H), 7.41 (t, *J* = 7.3 Hz, 4H), 7.31 (q, *J* = 7.3 Hz, 2H), 7.21 (d, *J* = 7.6 Hz, 2H), 5.96 (d, *J* = 10.4 Hz, 1H), 5.65 (d, *J* = 10.3 Hz, 1H), 4.59 (dd, *J* = 10.9, 6.9 Hz, 1H), 4.38 (dd, *J* = 10.8, 7.0 Hz, 1H), 4.24 (t, *J* = 6.8 Hz, 1H), 2.39 (s, 3H). <sup>13</sup>C NMR (151 MHz, CDCl<sub>3</sub>) δ 155.4, 143.7, 141.4, 139.4, 131.9, 129.3, 129.0, 127.9, 127.2, 125.2, 120.1, 102.0, 69.0, 67.4, 47.2, 21.2. HRMS (ESI) calcd for C<sub>24</sub>H<sub>20</sub>Cl<sub>3</sub>NO<sub>2</sub>Na<sup>+</sup>: 482.0452, found 482.0457.

Optical rotation: [α]<sub>D</sub><sup>25</sup> = 0.51 [c = 0.14, CH<sub>2</sub>Cl<sub>2</sub> (S)].

**HPLC condition:** Chiral column OD-3, n-hexane/*i*-PrOH = 90:10, flow rate = 1.0 mL/min, wavelength = 254 nm, (*S*)-**3e**: *t*<sub>R</sub> = 11.9 min for the major isomer, *t*<sub>R</sub> = 14.7 min for the minor isomer; (*R*)-**3e**: *t*<sub>R</sub> = 14.6 min for the major isomer, *t*<sub>R</sub> = 12.1 min for the minor isomer.

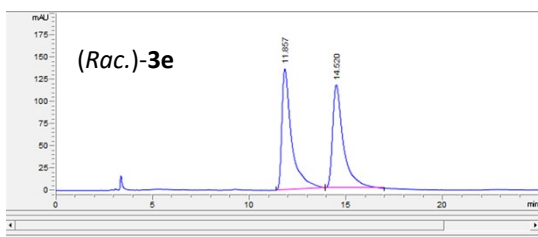

| # | Time   | Type | Area   | Height | Width  | Area%  | Symmetry |
|---|--------|------|--------|--------|--------|--------|----------|
| 1 | 11.857 | BB   | 4808.5 | 137.1  | 0.4992 | 51.264 | 0.407    |
| 2 | 14.52  | BB   | 4571.4 | 116.8  | 0.5546 | 48.736 | 0.477    |

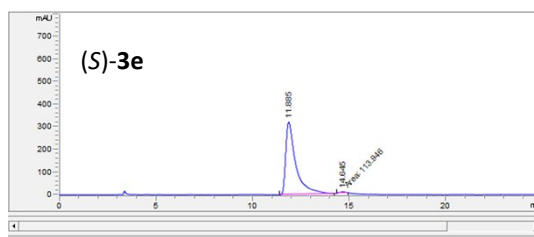

| # | Time   | Type | Area    | Height | Width  | Area%  | Symmetry |
|---|--------|------|---------|--------|--------|--------|----------|
| 1 | 11.885 | BB   | 11566.5 | 319.7  | 0.5221 | 99.024 | 0.376    |
| 2 | 14.645 | MM   | 113.9   | 5.5    | 0.346  | 0.976  | 0.797    |

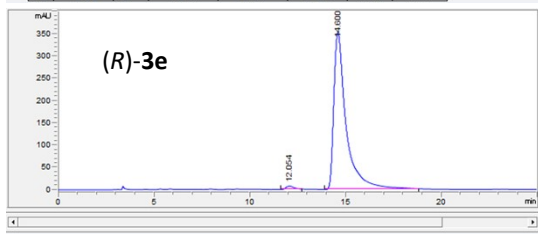

| # | Time   | Type | Area    | Height | Width  | Area%  | Symmetry |
|---|--------|------|---------|--------|--------|--------|----------|
| 1 | 12.054 | BB   | 213.5   | 7.7    | 0.349  | 1.327  | 0.703    |
| 2 | 14.6   | BB   | 15866.2 | 354.7  | 0.6559 | 98.673 | 0.441    |

**(9H-fluoren-9-yl)methyl-(S)-(1-(4-(tert-butyl)phenyl)-2,2,2-trichloroethyl)carbamate (3f)**

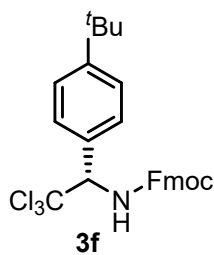

The title compound was isolated [(S)-**3f**: 28.2 mg, 56%, 94% *ee*] as a white solid flash chromatography on silica gel (Hexane/EtOAc = 25:1). <sup>1</sup>H NMR (600 MHz, CDCl<sub>3</sub>) δ 7.77 (d, *J* = 7.6 Hz, 2H), 7.59 (dd, *J* = 7.7, 2.8 Hz, 2H), 7.41 (p, *J* = 7.8 Hz, 6H), 7.30 (q, *J* = 7.4 Hz, 2H), 5.89 (d, *J* = 10.4 Hz, 1H), 5.64 (d, *J* = 10.4 Hz, 1H), 4.58 (dd, *J* = 10.8, 6.9 Hz, 1H), 4.35 (dd, *J* = 10.9, 7.0 Hz, 1H), 4.24 (t, *J* = 6.9 Hz, 1H), 1.34 (s, 9H). <sup>13</sup>C NMR (151 MHz, CDCl<sub>3</sub>) δ 155.4, 152.4, 143.7, 141.4, 131.8, 129.1, 127.9, 127.2, 125.3, 125.2, 120.2, 102.0, 68.9, 67.5, 47.3, 34.8, 31.4. HRMS (ESI) calcd for C<sub>27</sub>H<sub>27</sub>Cl<sub>3</sub>NO<sub>2</sub><sup>+</sup>: 502.1102, found 502.1101.

Optical rotation: [α]<sub>D</sub><sup>25</sup> = 0.36 [c = 0.07, CH<sub>2</sub>Cl<sub>2</sub> (S)].

**HPLC condition:** Chiral column IC, n-hexane/*i*-PrOH = 97:3, flow rate = 1.0 mL/min, wavelength = 254 nm, (S)-**3f**: *t*<sub>R</sub> = 12.5 min for the major isomer, *t*<sub>R</sub> = 11.4 min for the minor isomer.

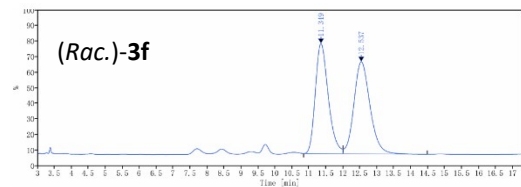

| Signal                  | Retention Time | Area    | Area% |
|-------------------------|----------------|---------|-------|
| VD1A, Wavelength=254 nm | 11.349         | 6521.67 | 48.91 |
|                         | 12.337         | 6768.13 | 51.09 |

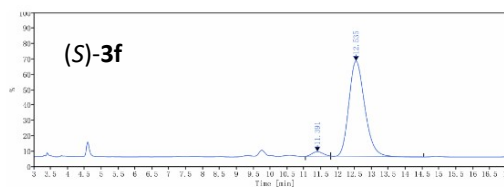

| Signal                  | Retention Time | Area    | Area% |
|-------------------------|----------------|---------|-------|
| VD1A, Wavelength=254 nm | 11.391         | 262.09  | 3.16  |
|                         | 12.515         | 7972.53 | 96.82 |

**(9H-fluoren-9-yl)methyl-(S)-([1,1'-biphenyl]-4-yl)-2,2,2-trichloroethyl)carbamate (3g)**



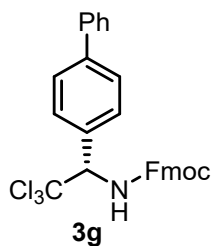

The title compound was isolated [(*S*)-**3g**: 27.1 mg, 52%, 97% *ee*] as a white solid flash chromatography on silica gel (Hexane/EtOAc = 25:1). <sup>1</sup>H NMR (600 MHz, CDCl<sub>3</sub>) δ 7.77 (d, *J* = 7.5 Hz, 2H), 7.60 (p, *J* = 8.7, 8.1 Hz, 8H), 7.46 (t, *J* = 7.5 Hz, 2H), 7.40 (q, *J* = 6.5, 5.2 Hz, 3H), 7.31 (dt, *J* = 10.6, 4.9 Hz, 2H), 5.93 (d, *J* = 10.3 Hz, 1H), 5.70 (d, *J* = 10.3 Hz, 1H), 4.61 (dd, *J* = 10.8, 6.8 Hz, 1H), 4.40 (dd, *J* = 10.8, 6.9 Hz, 1H), 4.25 (t, *J* = 6.8 Hz, 1H). <sup>13</sup>C NMR (151 MHz, CDCl<sub>3</sub>) δ 155.4, 143.7, 142.2, 141.5, 140.3, 133.8, 129.8, 129.0, 127.93, 127.86, 127.3, 127.2, 127.0, 125.1, 120.2, 101.7, 69.0, 67.5, 47.3. HRMS (ESI) calcd for C<sub>29</sub>H<sub>22</sub>Cl<sub>3</sub>NO<sub>2</sub>Na<sup>+</sup>: 544.0608, found 544.0612.

Optical rotation: [α]<sub>D</sub><sup>25</sup> = 1.08 [c = 0.05, CH<sub>2</sub>Cl<sub>2</sub> (*S*)].

**HPLC condition:** Chiral column IC, n-hexane/*i*-PrOH = 97:3, flow rate = 1.0 mL/min, wavelength = 254 nm, (*S*)-**3g**: t<sub>R</sub> = 21.2 min for the major isomer, t<sub>R</sub> = 18.2 min for the minor isomer.

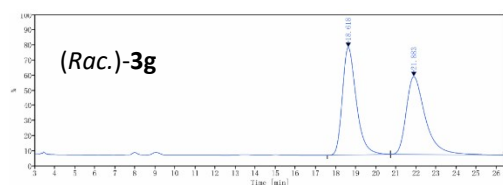

| Signal | Retention Time | Type | Area     | Area% |
|--------|----------------|------|----------|-------|
|        | 18.188         | BB   | 11861.68 | 50.20 |
|        | 21.883         | BB   | 11766.12 | 49.80 |

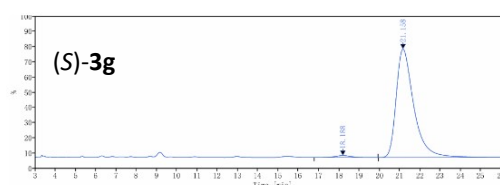

| Signal | Retention Time | Type | Area     | Area% |
|--------|----------------|------|----------|-------|
|        | 18.188         | BB   | 392.61   | 1.52  |
|        | 21.158         | BB   | 25110.96 | 98.48 |

### (9H-fluoren-9-yl)methyl-(*S*)-(2,2,2-trichloro-1-(4-(trimethylsilyl)phenyl)ethyl)carbamate (**3h**)

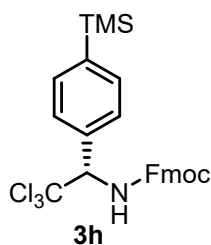

The title compound was isolated [(*S*)-**3h**: 35.2 mg, 68%, 99% *ee*] as a white solid flash chromatography on silica gel (Hexane/EtOAc = 30:1). <sup>1</sup>H NMR (600 MHz, CDCl<sub>3</sub>) δ 7.77 (d, *J* = 7.5 Hz, 2H), 7.58 (dd, *J* = 7.5, 2.8 Hz, 2H), 7.55 (d, *J* = 7.6 Hz, 2H), 7.49 (d, *J* = 7.7 Hz, 2H), 7.40 (dd, *J* = 8.7, 6.5 Hz, 2H), 7.30 (q, *J* = 7.3 Hz, 2H), 5.90 (d, *J* = 10.3 Hz, 1H), 5.64 (d, *J* = 10.3 Hz, 1H), 4.58 (dd, *J* = 10.8, 6.8 Hz, 1H), 4.37 (dd, *J* = 10.8, 6.9 Hz, 1H), 4.24 (t, *J* = 6.8 Hz, 1H), 0.29 (s, 9H). <sup>13</sup>C NMR (151 MHz, CDCl<sub>3</sub>) δ 155.4, 143.7, 142.1, 141.5, 135.2, 133.3, 128.7, 127.9, 127.2, 125.2, 120.2, 101.8, 69.3, 67.5, 47.3, -1.1. HRMS (ESI) calcd for C<sub>26</sub>H<sub>26</sub>Cl<sub>3</sub>NO<sub>2</sub>SiNa<sup>+</sup>: 518.0871, found 518.0867.

Optical rotation: [α]<sub>D</sub><sup>25</sup> = 0.40 [c = 0.04, CH<sub>2</sub>Cl<sub>2</sub> (*S*)].

**HPLC condition:** Chiral column IC, n-hexane/*i*-PrOH = 97:3, flow rate = 1.0 mL/min, wavelength = 254 nm, (*S*)-**3h**: t<sub>R</sub> = 8.5 min for the major isomer, t<sub>R</sub> = 7.3 min for the minor isomer.

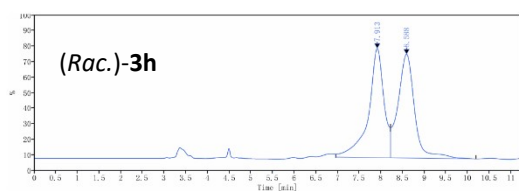

| Retention Time | Type | Area     | Area% |
|----------------|------|----------|-------|
| 7.913          | UV   | 11576.88 | 49.72 |
| 8.588          | UV   | 11704.12 | 50.28 |

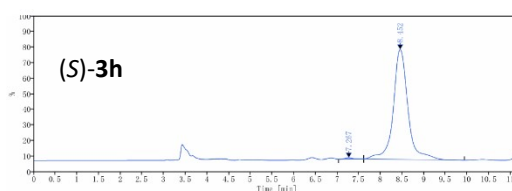

| Retention Time | Type | Area     | Area% |
|----------------|------|----------|-------|
| 7.267          | UV   | 338.35   | 0.43  |
| 8.452          | UV   | 53150.56 | 99.57 |

### (9H-fluoren-9-yl)methyl-(S)-(2,2,2-trichloro-1-(4-methoxyphenyl)ethyl)carbamate (**3i**)

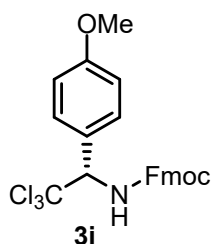

The title compound was isolated [(*S*)-**3i**: 24.3 mg, 51%, 95% *ee*] as a white solid flash chromatography on silica gel (Hexane/EtOAc = 15:1). <sup>1</sup>H NMR (600 MHz, CDCl<sub>3</sub>) δ 7.76 (d, *J* = 7.6 Hz, 2H), 7.58 (s, 2H), 7.41 (dt, *J* = 15.0, 7.8 Hz, 4H), 7.30 (d, *J* = 6.3 Hz, 2H), 6.91 (d, *J* = 8.3 Hz, 2H), 5.87 (d, *J* = 10.3 Hz, 1H), 5.60 (d, *J* = 10.2 Hz, 1H), 4.58 (dd, *J* = 10.9, 6.9 Hz, 1H), 4.37 (dd, *J* = 10.7, 6.8 Hz, 1H), 4.24 (t, *J* = 6.7 Hz, 1H), 3.82 (s, 3H). <sup>13</sup>C NMR (151 MHz, CDCl<sub>3</sub>) δ 160.3, 155.4, 143.7, 141.5, 130.6, 127.9, 127.2, 127.0, 125.2, 120.2, 113.7, 102.2, 68.8, 67.5, 55.4, 47.3. HRMS (ESI) calcd for C<sub>24</sub>H<sub>20</sub>Cl<sub>3</sub>NO<sub>3</sub>Na<sup>+</sup>: 498.0401, found 498.0405.

Optical rotation: [α]<sub>D</sub><sup>25</sup> = 1.13 [c = 0.04, CH<sub>2</sub>Cl<sub>2</sub> (*S*)].

**HPLC condition:** Chiral column IC, n-hexane/*i*-PrOH = 97:3, flow rate = 1.0 mL/min, wavelength = 254 nm, (*S*)-**3i**: *t*<sub>R</sub> = 23.8 min for the major isomer, *t*<sub>R</sub> = 20.2 min for the minor isomer.

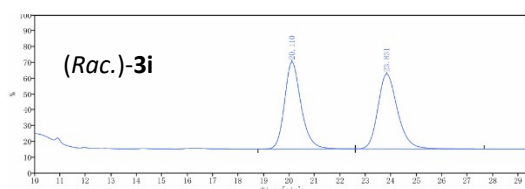

| Retention Time | Type | Area    | % Area |
|----------------|------|---------|--------|
| 20.110         | UV   | 2494.45 | 49.44  |
| 23.831         | UV   | 2550.85 | 50.56  |

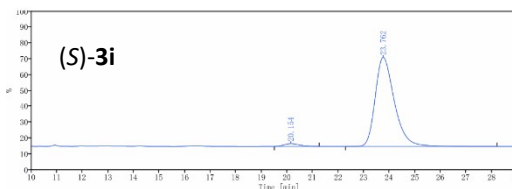

| Retention Time | Type | Area    | % Area |
|----------------|------|---------|--------|
| 20.154         | UV   | 192.81  | 2.41   |
| 23.762         | UV   | 7811.58 | 97.59  |

### (9H-fluoren-9-yl)methyl-(S)-(2,2,2-trichloro-1-(4-phenoxyphenyl)ethyl)carbamate (**3j**)

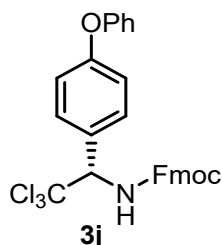

The title compound was isolated [(*S*)-**3j**: 30.1 mg, 57%, 96% *ee*] as a white solid flash chromatography on silica gel (Hexane/EtOAc = 25:1). <sup>1</sup>H NMR (600 MHz, CDCl<sub>3</sub>) δ 7.77 (d, *J* = 7.6 Hz, 2H), 7.59 (t, *J* = 6.5 Hz, 2H), 7.45 (d, *J* = 8.3 Hz, 2H), 7.39 (dt, *J* = 18.0, 7.6 Hz, 4H), 7.30 (t, *J* = 7.2 Hz, 2H), 7.16 (t, *J* = 7.4 Hz, 1H), 7.05 (d, *J* = 7.9 Hz, 2H), 6.99 (d, *J* = 8.2 Hz, 2H), 5.86 (d, *J* = 10.3 Hz, 1H), 5.62 (d, *J* = 10.2 Hz, 1H), 4.60 (dd, *J* = 10.9, 6.8 Hz, 1H), 4.39 (dd, *J* = 10.8, 7.0 Hz, 1H), 4.24 (t, *J* = 6.7 Hz, 1H). <sup>13</sup>C NMR (151 MHz, CDCl<sub>3</sub>) δ 158.5, 156.3, 155.4, 143.7, 141.5, 130.9, 130.0, 129.2, 127.9, 127.2,

125.2, 124.1, 120.2, 119.8, 117.9, 101.9, 68.7, 67.5, 47.3. HRMS (ESI) calcd for  $C_{29}H_{22}Cl_3NO_3Na^+$ : 560.0557, found 560.0561.

Optical rotation:  $[\alpha]_D^{25} = 1.05$  [ $c = 0.04$ ,  $CH_2Cl_2$  (S)].

**HPLC condition:** Chiral column IC, n-hexane/i-PrOH = 95:5, flow rate = 1.0 mL/min, wavelength = 254 nm, (S)-**3j**:  $t_R = 15.0$  min for the major isomer,  $t_R = 12.7$  min for the minor isomer.

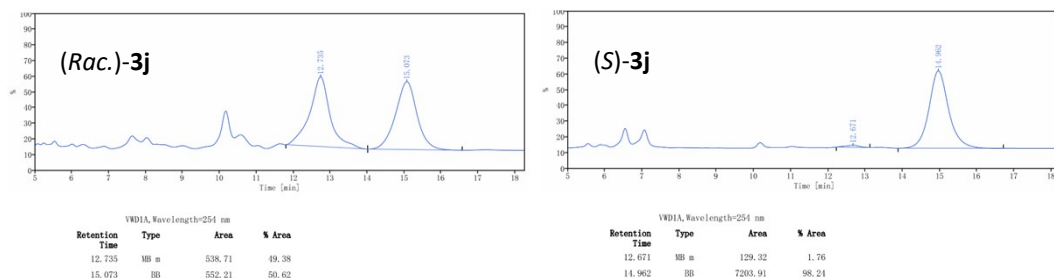

### (9H-fluoren-9-yl)methyl-(S)-(2,2,2-trichloro-1-(4-(trifluoromethoxy)phenyl)ethyl)carbamate (**3k**)

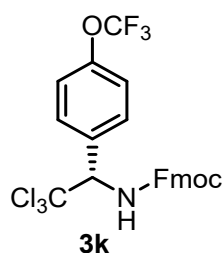

The title compound was isolated [(S)-**3k**: 32.3 mg, 61%, 96% ee] as a white solid flash chromatography on silica gel (Hexane/EtOAc = 25:1).  $^1H$  NMR (600 MHz,  $CDCl_3$ )  $\delta$  7.77 (d,  $J = 6.3$  Hz, 2H), 7.60 – 7.51 (m, 3H), 7.43 – 7.37 (m, 2H), 7.29 (d,  $J = 8.1$  Hz, 2H), 7.27 – 7.21 (m, 3H), 5.86 (d,  $J = 10.2$  Hz, 1H), 5.66 (d,  $J = 10.1$  Hz, 1H), 4.61 (ddd,  $J = 9.9, 6.4, 2.4$  Hz, 1H), 4.47 – 4.38 (m, 1H), 4.23 (td,  $J = 6.6, 2.3$  Hz, 1H).  $^{13}C$  NMR (151 MHz,  $CDCl_3$ )  $\delta$  155.4, 149.8, 143.6, 141.5, 133.5, 131.0, 128.0, 127.2, 125.1, 120.6, 120.5 (q,  $J = 257.9$  Hz), 120.2, 101.2, 68.6, 67.5, 47.3.  $^{19}F$  NMR (564 MHz,  $CDCl_3$ )  $\delta$  -57.96. HRMS (ESI) calcd for  $C_{24}H_{17}Cl_3F_3NO_3Na^+$ : 552.0118, found 552.0120.

Optical rotation:  $[\alpha]_D^{25} = 0.43$  [ $c = 0.07$ ,  $CH_2Cl_2$  (S)].

**HPLC condition:** Chiral column IC, n-hexane/i-PrOH = 97:3, flow rate = 1.0 mL/min, wavelength = 254 nm, (S)-**3k**:  $t_R = 10.1$  min for the major isomer,  $t_R = 8.8$  min for the minor isomer.

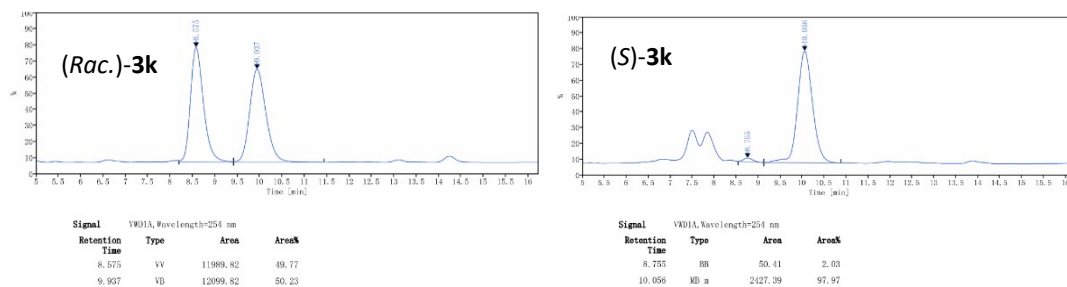

### (9H-fluoren-9-yl)methyl-(S)-(1-(4-((tert-butyl)dimethylsilyloxy)phenyl)-2,2,2-trichloroethyl)carbamate (**3l**)

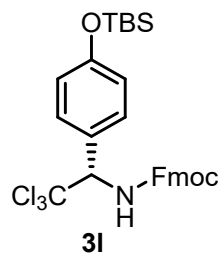

The title compound was isolated [(S)-**3l**: 30.5 mg, 53%, 92% ee] as a white solid

flash chromatography on silica gel (Hexane/EtOAc = 25:1).  $^1\text{H NMR}$  (600 MHz,  $\text{CDCl}_3$ )  $\delta$  7.76 (d,  $J = 7.6$  Hz, 2H), 7.57 (d,  $J = 5.9$  Hz, 2H), 7.40 (t,  $J = 7.5$  Hz, 2H), 7.35 (d,  $J = 8.2$  Hz, 2H), 7.30 (q,  $J = 7.3$  Hz, 2H), 6.84 (d,  $J = 8.1$  Hz, 2H), 5.85 – 5.76 (m, 1H), 5.58 (d,  $J = 10.3$  Hz, 1H), 4.59 (dd,  $J = 10.5$ , 6.8 Hz, 1H), 4.39 – 4.33 (m, 1H), 4.24 (t,  $J = 6.7$  Hz, 1H), 0.99 (s, 9H), 0.22 (s, 6H).  $^{13}\text{C NMR}$  (151 MHz,  $\text{CDCl}_3$ )  $\delta$  156.6, 155.4, 143.8, 141.5, 130.6, 127.9, 127.5, 127.2, 125.2, 120.2, 119.8, 102.4, 68.8, 67.5, 47.3, 25.8, 18.3, -4.2. HRMS (ESI) calcd for  $\text{C}_{29}\text{H}_{32}\text{Cl}_3\text{NO}_3\text{SiNa}^+$ : 598.1109, found 598.1115.

Optical rotation:  $[\alpha]_{\text{D}}^{25} = 1.17$  [ $c = 0.07$ ,  $\text{CH}_2\text{Cl}_2$  (S)].

**HPLC condition:** Chiral column OD, n-hexane/i-PrOH = 98:2, flow rate = 1.0 mL/min, wavelength = 254 nm, (S)-**3l**:  $t_{\text{R}} = 13.8$  min for the major isomer,  $t_{\text{R}} = 12.7$  min for the minor isomer.

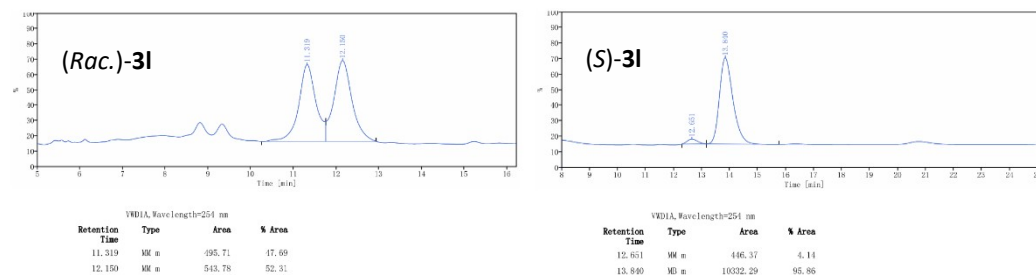

### (9H-fluoren-9-yl)methyl-(S)-(2,2,2-trichloro-1-(3-fluorophenyl)ethyl)carbamate (**3m**)

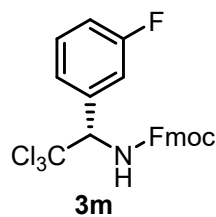

The title compound was isolated [(S)-**3m**: 30.2 mg, 65%, 98% ee] as a white solid flash chromatography on silica gel (Hexane/EtOAc = 25:1).  $^1\text{H NMR}$  (600 MHz,  $\text{CDCl}_3$ )  $\delta$  7.76 (d,  $J = 7.6$  Hz, 2H), 7.57 (t,  $J = 7.0$  Hz, 2H), 7.45 – 7.34 (m, 3H), 7.29 (t,  $J = 7.9$  Hz, 3H), 7.22 (d,  $J = 9.7$  Hz, 1H), 7.11 (t,  $J = 7.5$  Hz, 1H), 5.84 (d,  $J = 10.2$  Hz, 1H), 5.62 (d,  $J = 10.3$  Hz, 1H), 4.60 (dd,  $J = 10.8$ , 6.5 Hz, 1H), 4.41 (dd,  $J = 10.8$ , 6.8 Hz, 1H), 4.23 (t,  $J = 6.6$  Hz, 1H).  $^{13}\text{C NMR}$  (151 MHz,  $\text{CDCl}_3$ )  $\delta$  162.4 (d,  $J = 247.4$  Hz), 155.3, 143.7, 143.6, 141.5, 137.3 (d,  $J = 7.0$  Hz), 129.9 (d,  $J = 7.8$  Hz), 128.0, 127.2, 125.4, 125.0, 120.2, 116.4 (d,  $J = 21.2$  Hz), 101.1, 68.8, 67.6, 47.3.  $^{19}\text{F NMR}$  (377 MHz,  $\text{CDCl}_3$ )  $\delta$  -112.07. HRMS (ESI) calcd for  $\text{C}_{23}\text{H}_{17}\text{Cl}_3\text{FNO}_2\text{Na}^+$ : 486.0201, found 486.0204.

Optical rotation:  $[\alpha]_{\text{D}}^{25} = 0.80$  [ $c = 0.03$ ,  $\text{CH}_2\text{Cl}_2$  (S)].

**HPLC condition:** Chiral column AD-3, n-hexane/i-PrOH = 70:30, flow rate = 1.0 mL/min, wavelength = 210 nm,  $t_{\text{R}} = 4.9$  min for the major isomer,  $t_{\text{R}} = 6.6$  min for the minor isomer.

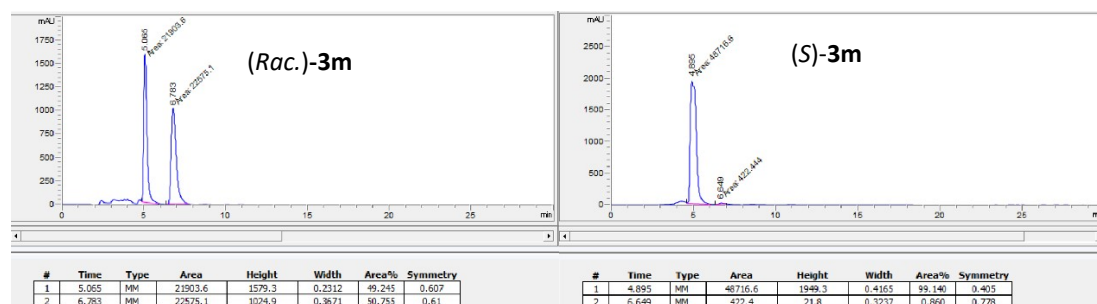

### (9H-fluoren-9-yl)methyl-(S)-(2,2,2-trichloro-1-(m-tolyl)ethyl)carbamate (**3n**)

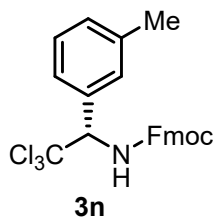

The title compound was isolated [(*S*)-**3n**: 34.0 mg, 74%, 97% *ee*] as a white solid flash chromatography on silica gel (Hexane/EtOAc = 25:1). <sup>1</sup>H NMR (600 MHz, CDCl<sub>3</sub>) δ 7.78 (d, *J* = 7.6 Hz, 2H), 7.63 – 7.56 (m, 2H), 7.41 (t, *J* = 7.4 Hz, 2H), 7.31 (d, *J* = 19.4 Hz, 5H), 7.23 (d, *J* = 7.5 Hz, 1H), 5.94 (d, *J* = 10.2 Hz, 1H), 5.64 (d, *J* = 10.3 Hz, 1H), 4.63 – 4.57 (m, 1H), 4.42 – 4.34 (m, 1H), 4.25 (t, *J* = 6.8 Hz, 1H), 2.40 (s, 3H). <sup>13</sup>C NMR (151 MHz, CDCl<sub>3</sub>) δ 155.4, 143.7, 141.4, 138.0, 134.8, 130.2, 130.1, 128.2, 127.9, 127.2, 126.4, 125.2, 120.1, 101.8, 69.2, 67.4, 47.2, 21.6. HRMS (ESI) calcd for C<sub>24</sub>H<sub>20</sub>Cl<sub>3</sub>NO<sub>2</sub>Na<sup>+</sup>: 482.0452, found 482.0456.

Optical rotation: [α]<sub>D</sub><sup>25</sup> = 0.95 [c = 0.04, CH<sub>2</sub>Cl<sub>2</sub> (*S*)].

**HPLC condition:** Chiral column IC, n-hexane/*i*-PrOH = 97:3, flow rate = 1.0 mL/min, wavelength = 254 nm, (*S*)-**3n**: t<sub>R</sub> = 13.8 min for the major isomer, t<sub>R</sub> = 16.3 min for the minor isomer.

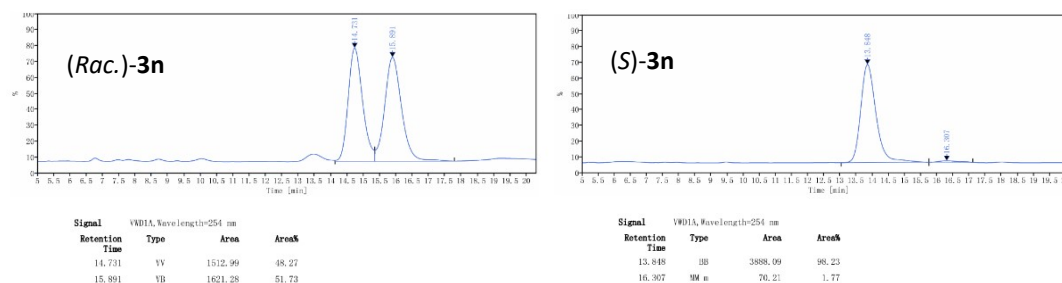

### (9*H*-fluoren-9-yl)methyl-(*S*)-(2,2,2-trichloro-1-(2-fluorophenyl)ethyl)carbamate (**3o**)

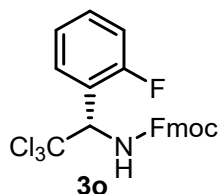

The title compound was isolated [(*S*)-**3o**: 18.6 mg, 40%, >99% *ee*] as a white solid flash chromatography on silica gel (Hexane/EtOAc = 25:1). <sup>1</sup>H NMR (600 MHz, CDCl<sub>3</sub>) δ 7.76 (d, *J* = 7.5 Hz, 2H), 7.58 (t, *J* = 7.0 Hz, 2H), 7.51 (t, *J* = 7.6 Hz, 1H), 7.40 (td, *J* = 7.5, 3.5 Hz, 3H), 7.34 – 7.26 (m, 2H), 7.20 (t, *J* = 7.6 Hz, 1H), 7.14 (dd, *J* = 10.7, 8.3 Hz, 1H), 6.06 – 5.99 (m, 1H), 5.83 (s, 1H), 4.60 (dd, *J* = 10.8, 6.8 Hz, 1H), 4.39 (dd, *J* = 10.8, 7.0 Hz, 1H), 4.25 (t, *J* = 6.8 Hz, 1H). <sup>13</sup>C NMR (151 MHz, CDCl<sub>3</sub>) δ 160.9 (d, *J* = 249.0 Hz), 155.4, 143.7, 141.5, 131.3 (d, *J* = 8.8 Hz), 130.6, 127.9, 127.2, 125.1 (d, *J* = 19.1 Hz), 124.2, 122.4 (d, *J* = 12.3 Hz), 120.2, 116.3 (d, *J* = 23.0 Hz), 101.5, 67.6, 64.2, 47.3. <sup>19</sup>F NMR (564 MHz, CDCl<sub>3</sub>) δ -112.29. HRMS (ESI) calcd for C<sub>23</sub>H<sub>17</sub>Cl<sub>3</sub>FNO<sub>2</sub>Na<sup>+</sup>: 486.0201, found 486.0205.

Optical rotation: [α]<sub>D</sub><sup>25</sup> = 0.40 [c = 0.02, CH<sub>2</sub>Cl<sub>2</sub> (*S*)].

**HPLC condition:** Chiral column IC, n-hexane/*i*-PrOH = 97:3, flow rate = 1.0 mL/min, wavelength = 254 nm, (*S*)-**3o**: t<sub>R</sub> = 12.7 min for the major isomer, t<sub>R</sub> = 13.9 min for the minor isomer.

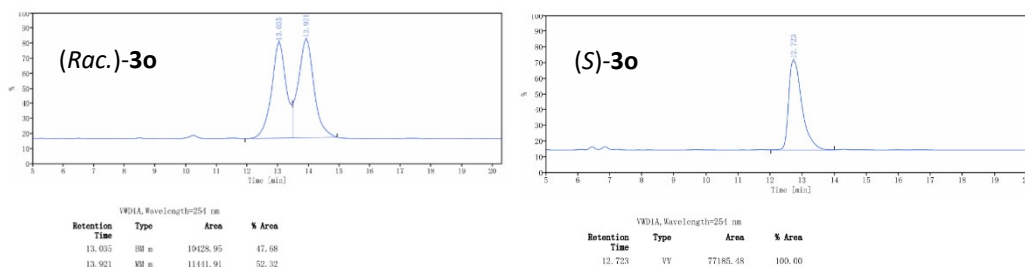

**(9H-fluoren-9-yl)methyl-(S)-(2,2,2-trichloro-1-(4-fluoro-3-methylphenyl)ethyl)carbamate (3p)**

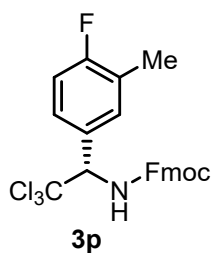

The title compound was isolated [(*S*)-**3p**: 30.1 mg, 63%, 99% *ee*] as a white solid flash chromatography on silica gel (Hexane/EtOAc = 25:1). <sup>1</sup>H NMR (600 MHz, CDCl<sub>3</sub>) δ 7.77 (d, *J* = 7.5 Hz, 2H), 7.57 (t, *J* = 6.2 Hz, 2H), 7.40 (td, *J* = 7.5, 3.1 Hz, 2H), 7.30 (t, *J* = 7.3 Hz, 4H), 7.02 (t, *J* = 8.8 Hz, 1H), 5.80 (d, *J* = 10.2 Hz, 1H), 5.58 (d, *J* = 10.2 Hz, 1H), 4.60 (dd, *J* = 10.9, 6.7 Hz, 1H), 4.39 (dd, *J* = 10.8, 6.8 Hz, 1H), 4.23 (t, *J* = 6.6 Hz, 1H), 2.30 (s, 3H). <sup>13</sup>C NMR (151 MHz, CDCl<sub>3</sub>) δ 161.8 (d, *J* = 247.9 Hz), 155.4, 143.7, 141.5, 132.7, 130.5 (d, *J* = 3.5 Hz), 128.4 (d, *J* = 8.4 Hz), 127.9, 127.2, 125.1, 125.0, 120.2, 115.0 (d, *J* = 22.6 Hz), 101.9, 68.7, 67.5, 47.3, 14.8 (d, *J* = 3.5 Hz). <sup>19</sup>F NMR (564 MHz, CDCl<sub>3</sub>) δ -116.10. HRMS (ESI) calcd for C<sub>24</sub>H<sub>19</sub>Cl<sub>3</sub>FNO<sub>2</sub>Na<sup>+</sup>: 500.0358, found 500.0361.

Optical rotation: [α]<sub>D</sub><sup>25</sup> = 0.80 [c = 0.03, CH<sub>2</sub>Cl<sub>2</sub> (*S*)].

**HPLC condition:** Chiral column IC, n-hexane/*i*-PrOH = 97:3, flow rate = 1.0 mL/min, wavelength = 254 nm, (*S*)-**3p**: t<sub>R</sub> = 17.3 min for the major isomer, t<sub>R</sub> = 26.1 min for the minor isomer.

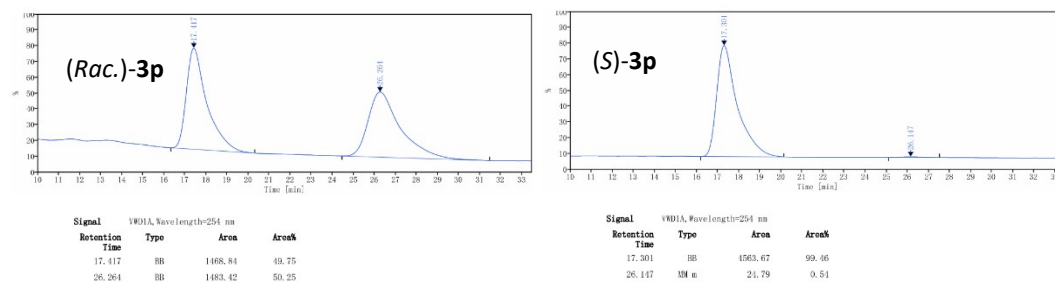

**(9H-fluoren-9-yl)methyl-(S)-(2,2,2-trichloro-1-(3,5-dimethylphenyl)ethyl)carbamate (3q)**

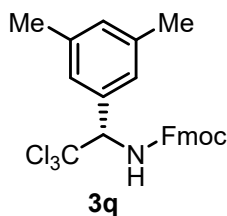

The title compound was isolated [(*S*)-**3q**: 31.3 mg, 66%, 98% *ee*] as a white solid flash chromatography on silica gel (Hexane/EtOAc = 30:1). <sup>1</sup>H NMR (600 MHz, CDCl<sub>3</sub>) δ 7.77 (d, *J* = 7.5 Hz, 2H), 7.60 (d, *J* = 4.9 Hz, 2H), 7.41 (t, *J* = 7.4 Hz, 2H), 7.31 (q, *J* = 6.8 Hz, 2H), 7.13 (s, 2H), 7.05 (s, 1H), 5.89 (d, *J* = 10.4 Hz, 1H), 5.59 (d, *J* = 10.3 Hz, 1H), 4.60 (dd, *J* = 10.9, 6.9 Hz, 1H), 4.37 (dd, *J* = 10.8, 6.9 Hz, 1H), 4.25 (t, *J* = 7.0 Hz, 1H), 2.36 (s, 6H). <sup>13</sup>C NMR (101 MHz, CDCl<sub>3</sub>) δ 155.4, 143.8, 143.7, 141.5, 137.9, 134.8, 131.0, 127.9, 127.2, 125.2, 120.2, 101.8, 69.3, 67.5, 47.3, 21.5. HRMS (ESI) calcd for

C<sub>25</sub>H<sub>22</sub>Cl<sub>3</sub>NO<sub>2</sub>Na<sup>+</sup>: 496.0608, found 496.0616.

Optical rotation:  $[\alpha]_D^{25} = 0.80$  [c = 0.07, CH<sub>2</sub>Cl<sub>2</sub> (S)].

**HPLC condition:** Chiral column IA, n-hexane/i-PrOH = 90:10, flow rate = 1.0 mL/min, wavelength = 254 nm, (S)-**3q**: t<sub>R</sub> = 6.8 min for the major isomer, t<sub>R</sub> = 7.6 min for the minor isomer.

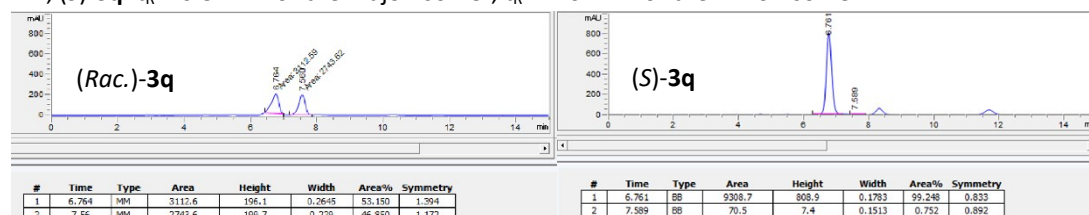

(9H-fluoren-9-yl)methyl-(S)-(2,2,2-trichloro-1-(4-methoxy-3,5-dimethylphenyl)ethyl)carbamate (**3r**)

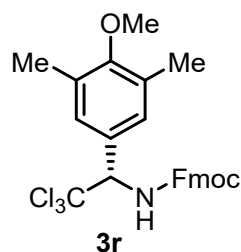

The title compound was isolated [(S)-**3r**: 34.8 mg, 69%, 80% ee] as a white solid

flash chromatography on silica gel (Hexane/EtOAc = 30:1). <sup>1</sup>H NMR (600 MHz, CDCl<sub>3</sub>) δ 7.76 (d, J = 4.7 Hz, 2H), 7.58 (d, J = 4.7 Hz, 2H), 7.43 – 7.37 (m, 2H), 7.33 – 7.27 (m, 2H), 7.15 (s, 2H), 5.86 (d, J = 10.4 Hz, 1H), 5.54 (d, J = 10.5 Hz, 1H), 4.59 (q, J = 4.0, 3.5 Hz, 1H), 4.35 (t, J = 5.6 Hz, 1H), 4.29 – 4.16 (m, 1H), 3.73 (s, 3H), 2.30 (s, 6H). <sup>13</sup>C NMR (101 MHz, CDCl<sub>3</sub>) δ 157.8, 155.4, 143.8, 141.5, 130.9, 130.2, 129.8, 127.9, 127.2, 125.1, 120.2, 102.0, 68.9, 67.5, 59.8, 47.3, 16.4. HRMS (ESI) calcd for C<sub>26</sub>H<sub>25</sub>Cl<sub>3</sub>NO<sup>+</sup>: 504.0895, found 504.0901.

Optical rotation:  $[\alpha]_D^{25} = 0.83$  [c = 0.07, CH<sub>2</sub>Cl<sub>2</sub> (S)].

**HPLC condition:** Chiral column OD-H, n-hexane/i-PrOH = 70:30, flow rate = 1.0 mL/min, wavelength = 220 nm, (S)-**3r**: t<sub>R</sub> = 6.6 min for the major isomer, t<sub>R</sub> = 9.6 min for the minor isomer.

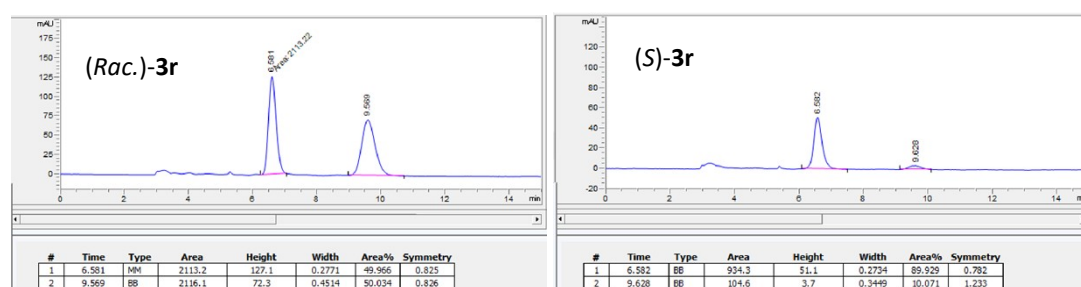

(9H-fluoren-9-yl)methyl-(S)-(2,2,2-trichloro-1-(naphthalen-1-yl)ethyl)carbamate (**3s**)

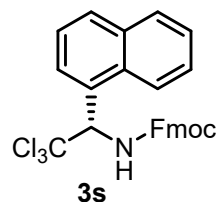

The title compound was isolated [(S)-**3s**: 22.3 mg, 45%, 98% ee] as a white solid

flash chromatography on silica gel (Hexane/EtOAc = 25:1). <sup>1</sup>H NMR (600 MHz, CDCl<sub>3</sub>) δ 7.92 (d, J = 8.2 Hz, 1H), 7.88 (d, J = 8.3 Hz, 1H), 7.78 (d, J = 7.6 Hz, 1H), 7.62 (s, 3H), 7.52 (dd, J = 15.1, 7.7 Hz, 4H), 7.42 (dt, J = 19.4, 7.5 Hz, 4H), 7.31 (s, 1H), 5.95 (d, J = 10.3 Hz, 1H), 5.75 (d, J = 10.5 Hz, 1H), 4.63 (d, J = 8.7 Hz, 1H), 4.43 (t, J = 8.9 Hz, 1H), 4.28 (t, J = 6.7 Hz, 1H). <sup>13</sup>C NMR (151 MHz, CDCl<sub>3</sub>) δ 155.5, 143.8, 141.9,



141.5, 139.4, 133.9, 131.5, 130.0, 129.4, 128.5, 128.2, 127.9, 127.2, 126.4, 125.5, 125.1, 120.2, 101.8, 69.2, 67.6, 47.3. HRMS (ESI) calcd for  $C_{27}H_{21}Cl_3NO_2^+$ : 496.0632, found 496.0635.

Optical rotation:  $[\alpha]_D^{25} = 0.53$  [ $c = 0.03$ ,  $CH_2Cl_2$  (S)].

**HPLC condition:** Chiral column IC, n-hexane/i-PrOH = 99:1, flow rate = 1.0 mL/min, wavelength = 254 nm, (S)-**3s**:  $t_R = 36.8$  min for the major isomer,  $t_R = 32.3$  min for the minor isomer.

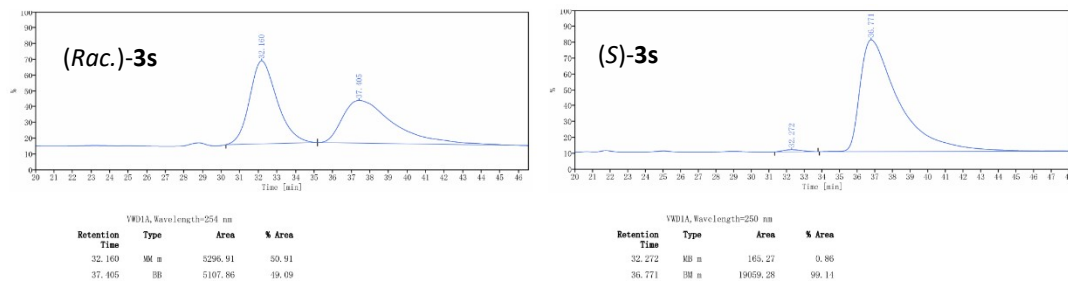

### (9H-fluoren-9-yl)methyl-(S)-(2,2,2-trichloro-1-(naphthalen-2-yl)ethyl)carbamate (**3t**)

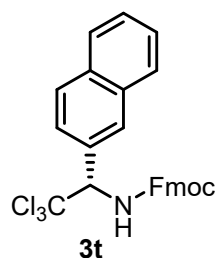

The title compound was isolated [(S)-**3t**: 32.7 mg, 66%, 99% *ee*] as a white solid flash chromatography on silica gel (Hexane/EtOAc = 25:1).  $^1H$  NMR (600 MHz,  $CDCl_3$ )  $\delta$  7.99 (s, 1H), 7.87 (d,  $J = 8.8$  Hz, 3H), 7.75 (d,  $J = 7.7$  Hz, 2H), 7.60 (d,  $J = 21.2$  Hz, 3H), 7.55 (s, 2H), 7.38 (d,  $J = 7.2$  Hz, 2H), 7.29 (s, 2H), 6.02 (d,  $J = 10.2$  Hz, 1H), 5.84 (d,  $J = 10.4$  Hz, 1H), 4.61 (t,  $J = 9.1$  Hz, 1H), 4.47 – 4.35 (m, 1H), 4.24 (t,  $J = 6.8$  Hz, 1H).  $^{13}C$  NMR (151 MHz,  $CDCl_3$ )  $\delta$  155.5, 143.7, 141.4, 133.5, 132.8, 132.3, 129.5, 128.4, 128.1, 127.9, 127.8, 127.2, 127.1, 126.7, 126.2, 125.1, 120.2, 101.8, 69.4, 67.5, 47.3. HRMS (ESI) calcd for  $C_{27}H_{21}Cl_3NO_2^+$ : 496.0632, found 496.0638.

Optical rotation:  $[\alpha]_D^{25} = 0.63$  [ $c = 0.03$ ,  $CH_2Cl_2$  (S)].

**HPLC condition:** Chiral column IC, n-hexane/i-PrOH = 97:3, flow rate = 1.0 mL/min, wavelength = 254 nm, (S)-**3t**:  $t_R = 18.0$  min for the major isomer,  $t_R = 16.4$  min for the minor isomer.

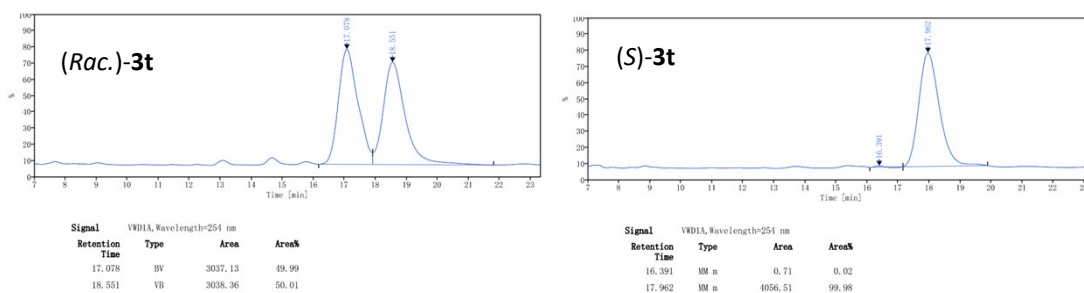

### (9H-fluoren-9-yl)methyl-(S)-(2,2,2-trichloro-1-(thiophen-2-yl)ethyl)carbamate (**3u**)

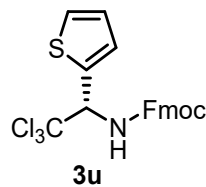

The title compound was isolated [(S)-**3u**: 19.8 mg, 44%, 93% *ee*] as a yellow solid flash chromatography on silica gel (Hexane/EtOAc = 25:1).  $^1H$  NMR (600 MHz,  $CDCl_3$ )  $\delta$  7.77 (d,  $J = 7.6$  Hz, 2H), 7.58 (d,  $J = 7.5$  Hz, 2H), 7.41 (t,  $J = 7.5$  Hz, 2H), 7.37 (d,  $J = 5.1$  Hz, 1H), 7.33 – 7.29 (m, 2H),



7.27 (d,  $J = 3.4$  Hz, 1H), 7.03 (t,  $J = 4.5$  Hz, 1H), 5.96 (d,  $J = 10.2$  Hz, 1H), 5.74 (d,  $J = 10.4$  Hz, 1H), 4.59 (dd,  $J = 10.8, 6.7$  Hz, 1H), 4.41 (dd,  $J = 10.8, 7.0$  Hz, 1H), 4.25 (t,  $J = 7.0$  Hz, 1H).  $^{13}\text{C}$  NMR (151 MHz,  $\text{CDCl}_3$ )  $\delta$  155.2, 143.6, 141.4, 137.1, 129.5, 127.9, 127.2, 126.9, 126.7, 125.2, 120.2, 101.3, 67.6, 65.9, 47.2. HRMS (ESI) calcd for  $\text{C}_{21}\text{H}_{16}\text{Cl}_3\text{NO}_2\text{SNa}^+$ : 473.9860, found 473.9865.

Optical rotation:  $[\alpha]_{\text{D}}^{25} = 0.37$  [ $c = 0.03$ ,  $\text{CH}_2\text{Cl}_2$  (S)].

**HPLC condition:** Chiral column OD, n-hexane/*i*-PrOH = 88:12, flow rate = 1.0 mL/min, wavelength = 254 nm, (S)-**3u**:  $t_{\text{R}} = 19.6$  min for the major isomer,  $t_{\text{R}} = 22.9$  min for the minor isomer.

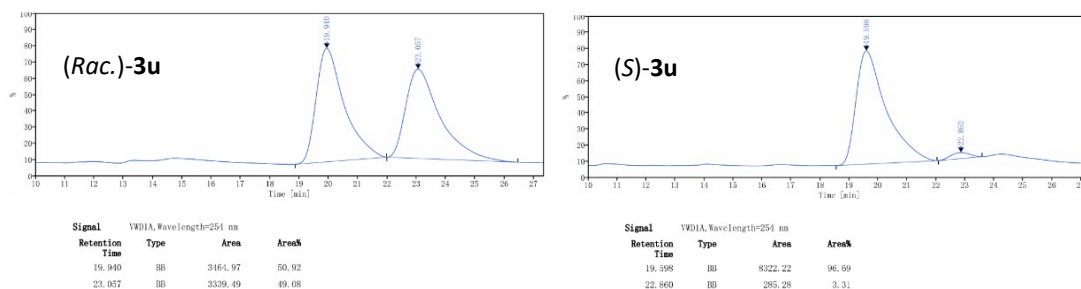

### (9H-fluoren-9-yl)methyl-(S)-(1-(benzofuran-5-yl)-2,2,2-trichloroethyl)carbamate (**3v**)

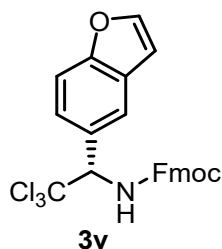

The title compound was isolated [(S)-**3v**: 21.1 mg, 43%, 91% *ee*] as a white solid flash chromatography on silica gel (Hexane/EtOAc = 25:1).  $^1\text{H}$  NMR (600 MHz,  $\text{CDCl}_3$ )  $\delta$  7.76 (t,  $J = 7.3$  Hz, 2H), 7.64 – 7.58 (m, 3H), 7.52 (d,  $J = 8.3$  Hz, 1H), 7.43 – 7.35 (m, 3H), 7.30 (d,  $J = 9.4$  Hz, 2H), 7.28 (s, 1H), 6.92 (s, 1H), 6.08 (d,  $J = 10.2$  Hz, 1H), 5.90 (d,  $J = 10.3$  Hz, 1H), 4.62 (dd,  $J = 10.8, 6.7$  Hz, 1H), 4.44 (dd,  $J = 10.8, 6.9$  Hz, 1H), 4.26 (t,  $J = 6.9$  Hz, 1H).  $^{13}\text{C}$  NMR (151 MHz,  $\text{CDCl}_3$ )  $\delta$  155.5, 154.8, 149.5, 146.5, 143.6, 141.5, 127.9, 127.2, 125.4, 125.2, 123.5, 121.7, 120.2, 111.6, 108.4, 100.1, 67.7, 64.5, 47.3. HRMS (ESI) calcd for  $\text{C}_{25}\text{H}_{18}\text{Cl}_3\text{NO}_3\text{Na}^+$ : 508.0244, found 508.0249.

Optical rotation:  $[\alpha]_{\text{D}}^{25} = 0.11$  [ $c = 0.03$ ,  $\text{CH}_2\text{Cl}_2$  (S)].

**HPLC condition:** Chiral column IA, n-hexane/*i*-PrOH = 90:10, flow rate = 1.0 mL/min, wavelength = 220 nm, (S)-**3v**:  $t_{\text{R}} = 19.0$  min for the major isomer,  $t_{\text{R}} = 24.2$  min for the minor isomer.

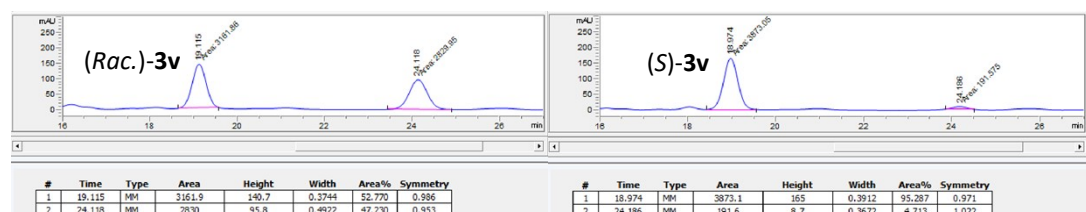

### H-fluoren-9-yl)methyl-(S)-(2,2,2-trichloro-1-(2,3-dihydrobenzo[b][1,4]dioxin-6-yl)ethyl)carbamate (**3w**)

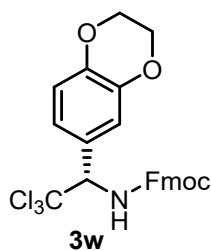

The title compound was isolated [(*S*)-**3w**: 26.2 mg, 52%, 99% *ee*] as a white solid

flash chromatography on silica gel (Hexane/EtOAc = 10:1). <sup>1</sup>H NMR (600 MHz, CDCl<sub>3</sub>) δ 7.76 (d, *J* = 7.6 Hz, 2H), 7.58 (t, *J* = 5.8 Hz, 2H), 7.40 (t, *J* = 7.4 Hz, 2H), 7.30 (td, *J* = 7.9, 4.0 Hz, 2H), 7.04 (s, 1H), 6.98 (d, *J* = 8.5 Hz, 1H), 6.87 (d, *J* = 8.4 Hz, 1H), 5.84 (d, *J* = 10.2 Hz, 1H), 5.54 (d, *J* = 10.2 Hz, 1H), 4.57 (dd, *J* = 10.8, 6.8 Hz, 1H), 4.37 (dd, *J* = 10.8, 7.1 Hz, 1H), 4.26 (s, 4H), 4.23 (t, *J* = 6.9 Hz, 1H). <sup>13</sup>C NMR (151 MHz, CDCl<sub>3</sub>) δ 155.4, 144.5, 143.7, 143.2, 141.4, 128.0, 127.9, 127.2, 125.2, 122.7, 120.1, 118.3, 117.1, 102.0, 68.8, 67.5, 64.5, 64.4, 47.3. HRMS (ESI) calcd for C<sub>25</sub>H<sub>20</sub>Cl<sub>3</sub>NO<sub>4</sub>Na<sup>+</sup>: 526.0350, found 526.0356.

Optical rotation: [α]<sub>D</sub><sup>25</sup> = [c = 0.03, CH<sub>2</sub>Cl<sub>2</sub> (*S*)].

**HPLC condition:** Chiral column AD-H, n-hexane/*i*-PrOH = 70:30 flow rate = 1.0 mL/min, wavelength = 210 nm, (*S*)-**3w**: *t*<sub>R</sub> = 11.6 min for the major isomer, *t*<sub>R</sub> = 20.0 min for the minor isomer.

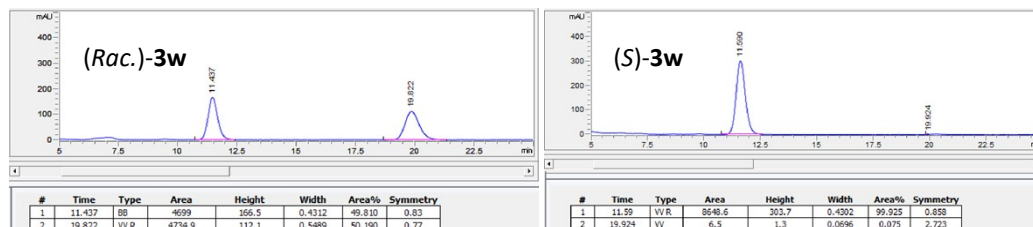

### Benzyl (*S*)-(2,2,2-trichloro-1-phenylethyl) carbamate (**3aa**)

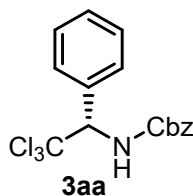

The title compound was isolated [(*S*)-**3aa**: 23.6 mg, 66%, 98% *ee*; (*R*)-**3aa**: 24.3 mg,

68%, 97% *ee*] as a white solid flash chromatography on silica gel (Hexane/EtOAc = 30:1). <sup>1</sup>H NMR (600 MHz, CDCl<sub>3</sub>) δ 7.50 (d, *J* = 6.7 Hz, 2H), 7.39 (d, *J* = 6.3 Hz, 3H), 7.36 (s, 5H), 5.92 (d, *J* = 10.3 Hz, 1H), 5.67 (d, *J* = 10.2 Hz, 1H), 5.21 – 5.09 (m, 2H). <sup>13</sup>C NMR (151 MHz, CDCl<sub>3</sub>) δ 155.4, 135.8, 134.9, 129.5, 129.4, 128.7, 128.6, 128.5, 128.4, 101.8, 69.3, 67.8. HRMS (ESI) calcd for C<sub>16</sub>H<sub>14</sub>Cl<sub>3</sub>NO<sub>2</sub>Na<sup>+</sup>: 379.9982, found 379.9980.

Optical rotation: [α]<sub>D</sub><sup>25</sup> = 0.87 [c = 0.09, CH<sub>2</sub>Cl<sub>2</sub> (*S*)].

**HPLC condition:** Chiral column AD-3, n-hexane/*i*-PrOH = 70:30, flow rate = 1.0 mL/min, wavelength = 210 nm, (*S*)-**3aa**: *t*<sub>R</sub> = 5.6 min for the major isomer, *t*<sub>R</sub> = 8.8 min for the minor isomer; (*R*)-**3aa**: *t*<sub>R</sub> = 8.7 min for the major isomer, *t*<sub>R</sub> = 5.5 min for the minor isomer.

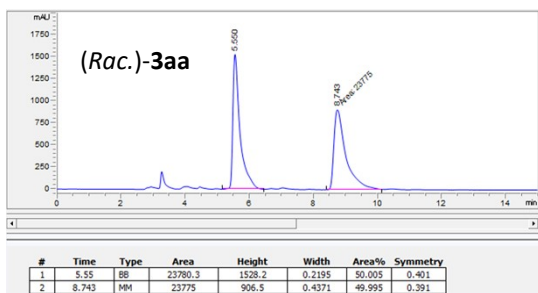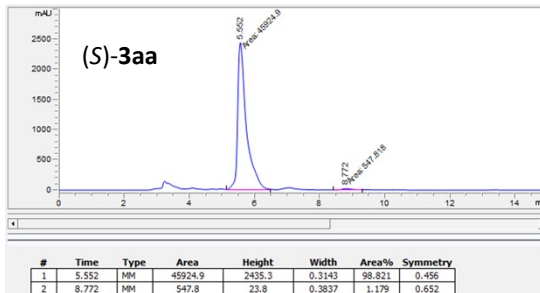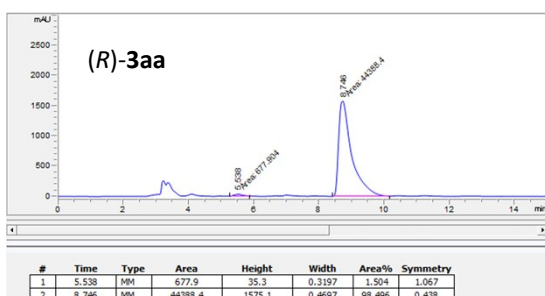

**(S)-4-methyl-N-(2,2,2-trichloro-1-phenylethyl) benzenesulfonamide (3ab)**

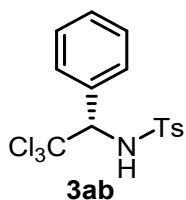

The title compound was isolated [(*S*)-**3ab**: 23.1 mg, 61%, 95% *ee*; (*R*)-**3ab**: 22.7 mg,

60%, 96% *ee*] as a white solid flash chromatography on silica gel (Hexane/EtOAc = 15:1). <sup>1</sup>H NMR (600 MHz, CDCl<sub>3</sub>) δ 7.52 (d, *J* = 8.4 Hz, 2H), 7.28 – 7.23 (m, 3H), 7.18 (t, *J* = 7.6 Hz, 2H), 7.05 (d, *J* = 8.0 Hz, 2H), 5.96 (d, *J* = 9.7 Hz, 1H), 5.11 (d, *J* = 9.8 Hz, 1H), 2.31 (s, 3H). <sup>13</sup>C NMR (101 MHz, CDCl<sub>3</sub>) δ 143.7, 137.2, 134.0, 129.5, 129.4, 129.2, 128.2, 127.2, 102.4, 72.0, 21.6. HRMS (ESI) calcd for C<sub>15</sub>H<sub>14</sub>Cl<sub>3</sub>NO<sub>2</sub>SNa<sup>+</sup>: 399.9703, found 399.9700.

Optical rotation: [α]<sub>D</sub><sup>25</sup> = 0.36 [c = 0.05, CH<sub>2</sub>Cl<sub>2</sub> (*S*)].

**HPLC condition:** Chiral column AD-3, n-hexane/*i*-PrOH = 80:20, flow rate = 0.5 mL/min, wavelength = 220 nm, (*S*)-**3ab**: *t*<sub>R</sub> = 14.4 min for the major isomer, *t*<sub>R</sub> = 16.7 min for the minor isomer; (*R*)-**3ab**: *t*<sub>R</sub> = 17.1 min for the major isomer, *t*<sub>R</sub> = 15.0 min for the minor isomer.

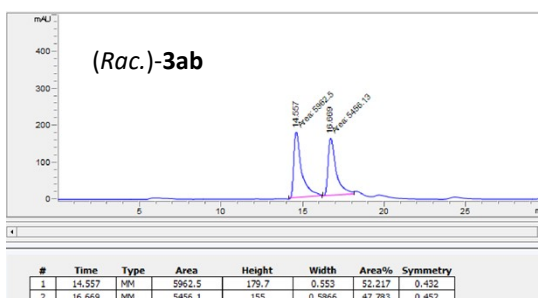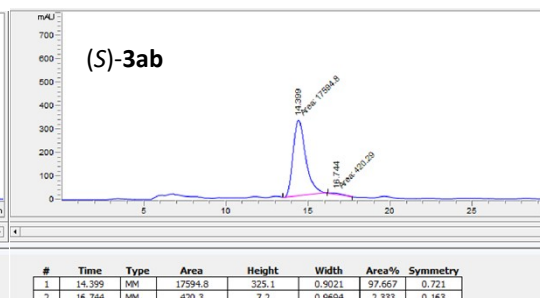

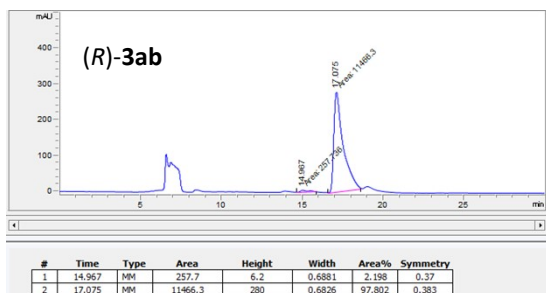

**(9H-fluoren-9-yl)methyl-(S)-(2,2,2-trifluoro-1-phenylethyl)carbamate (3ac)**

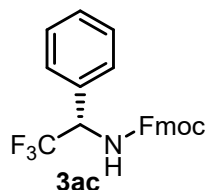

The title compound was isolated [(*S*)-**3ac**: 23.4 mg, 59%, 95% *ee*] as a white solid flash chromatography on silica gel (Hexane/EtOAc = 25:1). <sup>1</sup>H NMR (600 MHz, CDCl<sub>3</sub>) δ 7.77 (d, *J* = 7.7 Hz, 2H), 7.57 (d, *J* = 7.6 Hz, 2H), 7.40 (dd, *J* = 18.0, 7.0 Hz, 6H), 7.30 (t, *J* = 7.6 Hz, 2H), 5.53 (d, *J* = 9.8 Hz, 1H), 5.40 (t, *J* = 8.5 Hz, 1H), 4.52 (dd, *J* = 10.7, 6.8 Hz, 1H), 4.44 (dd, *J* = 10.8, 6.8 Hz, 1H), 4.22 (t, *J* = 6.8 Hz, 1H). <sup>13</sup>C NMR (151 MHz, CDCl<sub>3</sub>) δ 155.6, 143.70, 143.66, 141.5, 132.9, 129.5, 129.2, 128.0, 127.9, 127.3 (d, *J* = 2.1 Hz), 125.0, 120.2, 67.6, 56.7, 47.2. <sup>19</sup>F NMR (564 MHz, CDCl<sub>3</sub>) δ -74.23. HRMS (ESI) calcd for C<sub>23</sub>H<sub>18</sub>F<sub>3</sub>NO<sub>2</sub>Na<sup>+</sup>: 420.1182, found 420.1181.

Optical rotation: [α]<sub>D</sub><sup>25</sup> = 0.40 [c = 0.03, CH<sub>2</sub>Cl<sub>2</sub> (*S*)].

**HPLC condition:** Chiral column IC, n-hexane/*i*-PrOH = 97:3, flow rate = 1.0 mL/min, wavelength = 254 nm, (*S*)-**3ac**: t<sub>R</sub> = 9.3 min for the major isomer, t<sub>R</sub> = 10.7 min for the minor isomer.

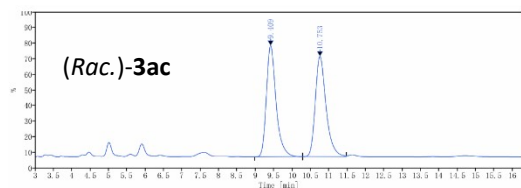

| Signal | Retention Time | YDIA, Wavelength=254 nm | Type    | Area  | Area% |
|--------|----------------|-------------------------|---------|-------|-------|
| 9.309  | 9.309          | BB                      | 3846.53 | 49.98 |       |
| 10.753 | 10.753         | BB                      | 3849.41 | 50.02 |       |

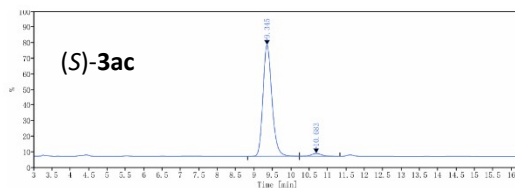

| Signal | Retention Time | YDIA, Wavelength=254 nm | Type    | Area  | Area% |
|--------|----------------|-------------------------|---------|-------|-------|
| 9.305  | 9.305          | BB                      | 4121.83 | 97.28 |       |
| 10.683 | 10.683         | BB                      | 123.82  | 2.72  |       |

(*H*)

**(9H-fluoren-9-yl)methyl-(S)-(2,2-difluoro-1-phenylethyl)carbamate (3ad)**

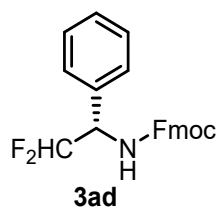

The title compound was isolated [(*S*)-**3ad**: 21.8 mg, 57%, 94% *ee*] as a white solid flash chromatography on silica gel (Hexane/EtOAc = 25:1). <sup>1</sup>H NMR (600 MHz, CDCl<sub>3</sub>) δ 7.77 (d, *J* = 7.5 Hz, 2H), 7.59 (d, *J* = 7.5 Hz, 2H), 7.40 (q, *J* = 6.5, 5.2 Hz, 4H), 7.32 (q, *J* = 7.6 Hz, 4H), 6.02 (t, *J* = 55.4 Hz, 1H), 5.49 (d, *J* = 8.9 Hz, 1H), 5.13 (q, *J* = 13.2, 12.3 Hz, 1H), 4.47 (qd, *J* = 10.7, 6.8 Hz, 2H), 4.23 (t, *J* = 6.7 Hz, 1H). <sup>13</sup>C NMR (151 MHz, CDCl<sub>3</sub>) δ 160.0, 143.8, 141.4, 134.2, 129.1, 129.0, 127.9, 127.8, 127.2 (d, *J* = 1.7 Hz), 125.1, 120.2, 114.8, 67.4, 56.8, 47.3. <sup>19</sup>F NMR (376 MHz, CDCl<sub>3</sub>) δ -124.95 (dd, *J* = 55.9, 15.4 Hz), -125.70 (dd, *J* = 55.9, 15.4 Hz), -127.14 (dd, *J* = 54.9, 14.3 Hz), -127.89 (dd, *J* = 54.4, 14.7 Hz). HRMS (ESI) calcd for C<sub>23</sub>H<sub>19</sub>F<sub>2</sub>NO<sub>2</sub>Na<sup>+</sup>: 402.1276, found 402.1269.

Optical rotation: [α]<sub>D</sub><sup>25</sup> = 0.20 [c = 0.04, CH<sub>2</sub>Cl<sub>2</sub> (*S*)].

**HPLC condition:** Chiral column IC, n-hexane/i-PrOH = 97:3, flow rate = 1.0 mL/min, wavelength = 254 nm, (*S*)-**3ad**:  $t_R$  = 14.2 min for the major isomer,  $t_R$  = 15.6 min for the minor isomer.

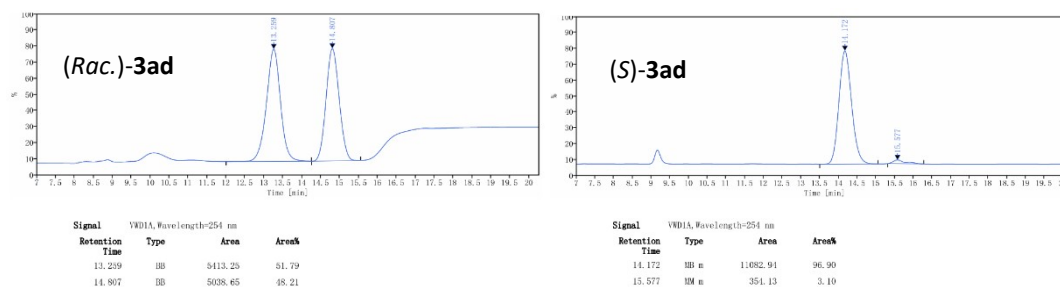

## General procedure for synthesis of boroxines

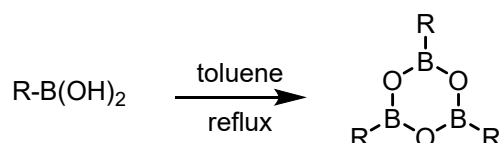

In a flame dried round bottom flask, a mixture of the boronic acid (1.0 g) in toluene (30 mL) was refluxed for 8 h with a Dean-Stark trap. The reaction solution was concentrated under vacuum at 80 °C to yield the corresponding boroxine. This boroxine was directly used in the next step without further purification.

## Preparation of trichloromethyl imine and asymmetric arylation reaction

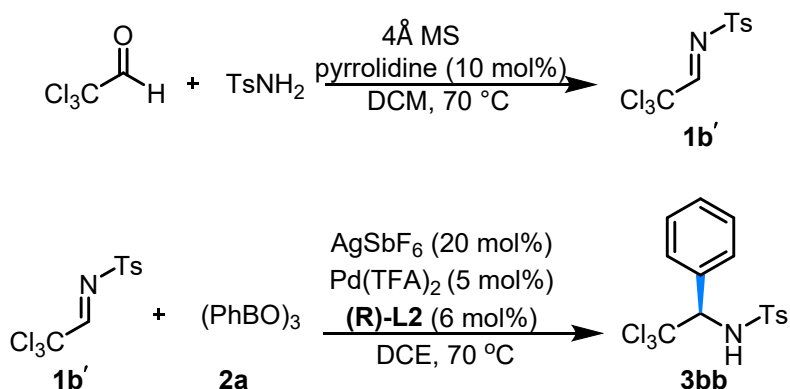

Prepare compound **1b'** according to previously reported procedures<sup>3</sup>, a dried schlenk flask was charged with trichloroacetaldehyde (500 mg, 3.4 mmol), TsNH<sub>2</sub> (550 mg, 2.3 mmol), activated 4Å molecular sieve and DCM. The reaction mixture was stirred at 70 °C for 24 h. Then the mixture was filtered through Celite and recrystallized in cold hexane. <sup>1</sup>H NMR (600 MHz, CDCl<sub>3</sub>) δ 9.05 (s, 1H), 7.81 (d, *J* = 8.2 Hz, 2H), 7.31 (d, *J* = 8.2 Hz, 2H), 2.43 (s, 3H). <sup>13</sup>C NMR (151 MHz, CDCl<sub>3</sub>) δ 176.8, 143.8, 139.1, 129.9, 126.6, 85.4, 21.7.

In a flame dried round bottom flask, the solution of Pd (TFA)<sub>2</sub> (3.3 mg, 0.01 mmol), (*R*)-<sup>t</sup>Bu-PyOX **L2** (2.4 mg, 0.012 mmol), AgSbF<sub>6</sub> (13.7 mg, 0.04 mmol), **1b'** (60.1 mg, 0.20 mmol), **2a** (124.4 mg, 0.40 mmol) and DCE (2 mL) were added. The reaction mixture was stirred at 70 °C for 12 h and the resulting solution was concentrated in vacuum. The crude product was purified by column chromatography on silica gel with a mixture of ethyl acetate and hexane (1:15) as eluent, yielding **3bb** (32% yield, 96% *ee*) as white solid.

## Gram-scale reaction

In a flame dried round bottom flask, the solution of Pd (TFA)<sub>2</sub> (34 mg, 0.10 mmol), (*S*)-<sup>t</sup>Bu-PyOX (25 mg, 0.12 mmol), AgSbF<sub>6</sub> (134 mg, 0.40 mmol), **1a** (0.86 g, 2.01 mmol), boroxine (1.24 g, 0.40 mmol)

and DCE (20 mL) were added. The reaction mixture was stirred at 70 °C for 20 h and the resulting solution was concentrated in vacuum. The crude product was purified by column chromatography on silica gel with a mixture of ethyl acetate and hexane (1:20) as eluent, yielding **3a** (0.72 g, 80% yield, 98% *ee*) as white solid.

### Transformation of $\alpha$ -aryl trichloroethylamines

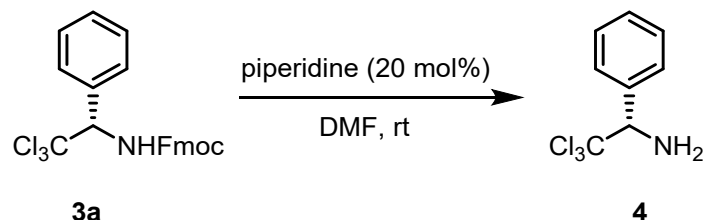

Prepared according to a previous reported procedure,<sup>4</sup> in a 4 mL screw-capped vial, **3a** (89.2 mg, 0.2 mmol), piperidine (3.4 mg, 0.06 mmol), DMF (1.0 mL) and a magnetic stirring bar were added under nitrogen. The mixture was stirred at room temperature 1 h. The crude product was purified by column chromatography on silica gel with a mixture of ethyl acetate and hexane (1:15) as eluent, yielding **4** (88% yield, 99% *ee*) as white solid.

### (*S*)-2,2,2-trichloro-1-phenylethan-1-amine (**4**)

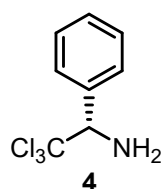

The title compound was isolated [(*S*)-**4**: 39.4 mg, 88%, 99% *ee*] as a colorless oil flash chromatography on silica gel (Hexane/EtOAc = 15:1). <sup>1</sup>H NMR (600 MHz, CDCl<sub>3</sub>)  $\delta$  7.53 (dd, *J* = 6.7, 3.0 Hz, 2H), 7.41 – 7.34 (m, 3H), 4.63 (s, 1H), 2.30 (s, 2H). <sup>13</sup>C NMR (151 MHz, CDCl<sub>3</sub>)  $\delta$  136.8, 129.3, 129.1, 128.1, 105.6, 72.0. HRMS (ESI) calcd for C<sub>8</sub>H<sub>9</sub>Cl<sub>3</sub>N<sup>+</sup>: 223.9795, found 223.9793.

Optical rotation:  $[\alpha]_D^{25} = 1.62$  [*c* = 0.05, CH<sub>2</sub>Cl<sub>2</sub> (*S*)].

**HPLC condition:** Chiral column AD-3, n-hexane/*i*-PrOH = 95:5, flow rate = 1.0 mL/min, wavelength = 254 nm, (*S*)-**4**: *t*<sub>R</sub> = 6.4 min for the major isomer, *t*<sub>R</sub> = 12.1 min for the minor isomer.

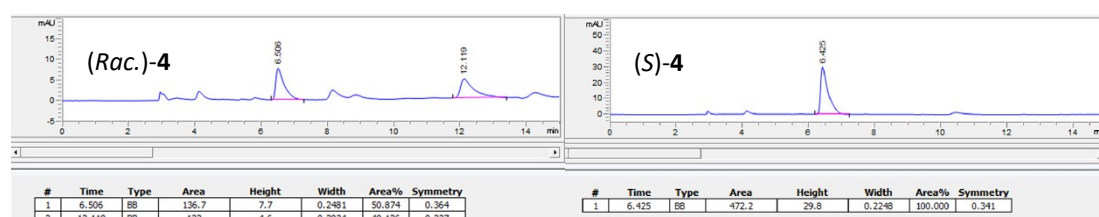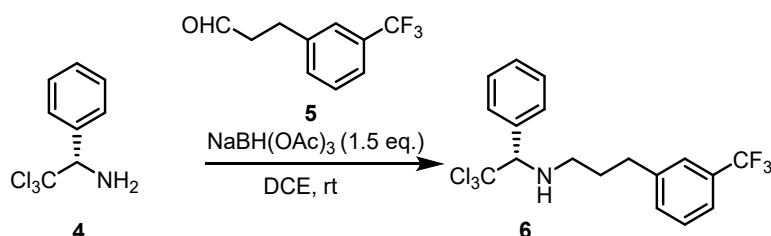

Prepared according to a previous reported method,<sup>5</sup> in a 4 mL screw-capped vial, **4** (22.4 mg, 0.10 mmol), **5** (23.8 mg, 0.11 mmol), NaBH(OAc)<sub>3</sub> (29.7 mg, 0.14 mmol), DCE (1.0 mL) and a magnetic stirring bar were added under nitrogen. The mixture was stirred at room temperature 1 h. The resulting solution was added 10 mL H<sub>2</sub>O. The crude reaction mixture was then extracted with ethyl

acetate (10 mL × 3). The combined organic layers were then dried over anhydrous Na<sub>2</sub>SO<sub>4</sub>, filtered, concentrated, and purified by flash column chromatography to give **6** (62% yield, 99% *ee*) as a colorless oil.

**(S)-N-(2,2,2-trichloro-1-phenylethyl)-3-(3-(trifluoromethyl)phenyl)propan-1-amine (6)**

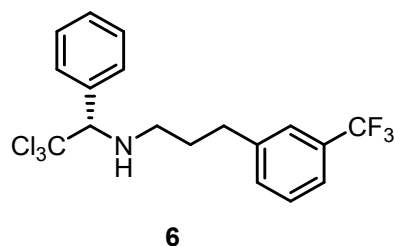

The title compound was isolated [(*S*)-**6**: 38.1 mg, 62%, 99% *ee*] as

a colorless oil flash chromatography on silica gel (Hexane/EtOAc = 40:1). <sup>1</sup>H NMR (600 MHz, CDCl<sub>3</sub>) δ 7.55 – 7.50 (m, 2H), 7.43 (d, *J* = 7.7 Hz, 1H), 7.41 – 7.34 (m, 5H), 7.32 (d, *J* = 7.7 Hz, 1H), 4.32 (s, 1H), 2.75 (dt, *J* = 15.0, 7.7 Hz, 1H), 2.71 – 2.65 (m, 1H), 2.62 (q, *J* = 6.8 Hz, 2H), 2.06 (s, 1H), 1.82 (p, *J* = 7.2 Hz, 2H). <sup>13</sup>C NMR (151 MHz, CDCl<sub>3</sub>) δ 142.9, 136.4, 132.0, 130.8 (d, *J* = 32.0 Hz), 130.0, 129.1, 128.9, 128.2, 125.2 (q, *J* = 7.0, 3.1 Hz), 123.5, 122.9 (q, *J* = 3.8 Hz), 103.1, 77.9, 47.3, 33.1, 31.5. <sup>19</sup>F NMR (376 MHz, CDCl<sub>3</sub>) δ -62.52. HRMS (ESI) calcd for C<sub>18</sub>H<sub>18</sub>Cl<sub>3</sub>F<sub>3</sub>N<sup>+</sup>: 410.0451, found 410.0448.

Optical rotation: [α]<sub>D</sub><sup>25</sup> = 1.70 [c = 0.10, CH<sub>2</sub>Cl<sub>2</sub> (*S*)].

**HPLC condition:** Chiral column AS-3, n-hexane/*i*-PrOH = 95:5, flow rate = 1.0 mL/min, wavelength = 220 nm, (*S*)-**6**: t<sub>R</sub> = 15.0 min for the major isomer, t<sub>R</sub> = 9.0 min for the minor isomer.

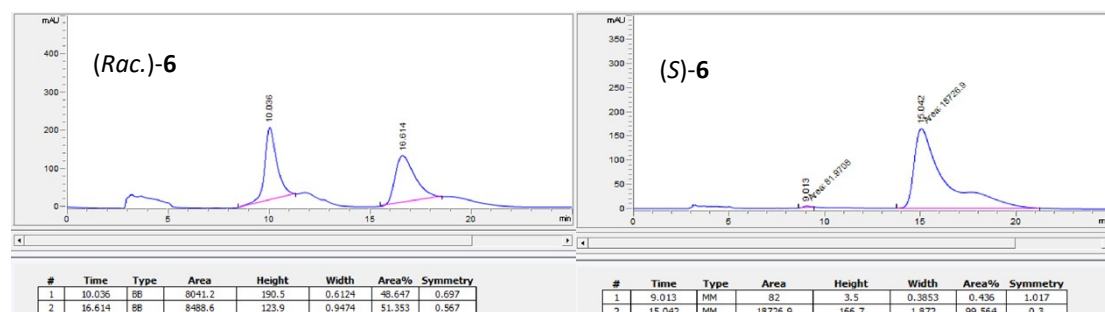

### Mechanism study

In a flame dried round bottom flask, Pd (TFA)<sub>2</sub> (1.7 mg, 0.005 mmol), (*S*)-<sup>t</sup>Bu-PyOX (1.2 mg, 0.006 mmol), AgSbF<sub>6</sub> (6.7 mg, 0.02 mmol), *N,O*-acetal (0.10 mmol), boroxine (62.2 mg, 0.20 mmol) and DCE (1 mL) were added under air. The reaction mixture was stirred at 70 °C for 5 h. We found that the *N*-Fmoc-CCl<sub>3</sub> imine intermediate could be formed in the presence of Pd catalyst and the Lewis acid additive AgSbF<sub>6</sub>, which could be detected by HRMS analysis as shown below.

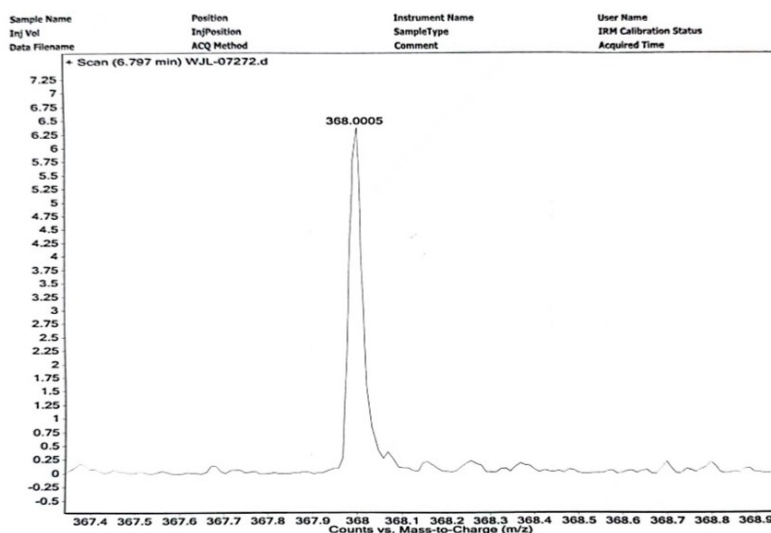

**Figure SI-1:** HRMS of *N*-Fmoc  $\text{CCl}_3$  imine intermediate

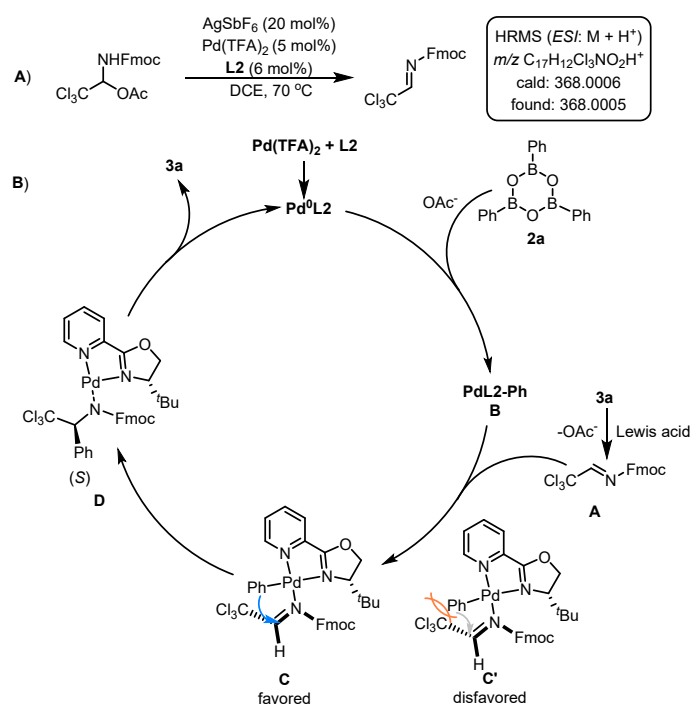

### Crystal structure of **3a**

Single crystal of product **3a** was obtained through slow evaporation of a mix solution in *n*-hexane and dichloromethane at glove box. X-ray data was collected with a Bruker APEX-II CCD diffractometer.

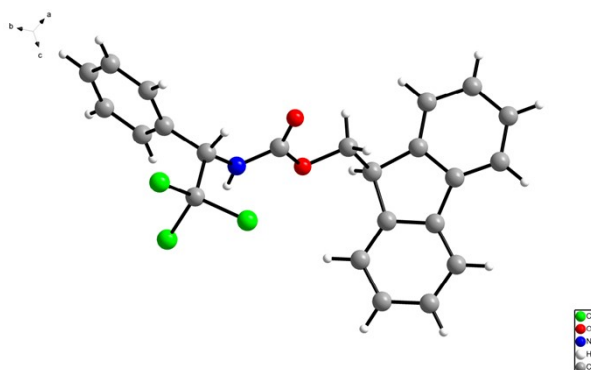



**Figure SI-3: X-Ray structure of compound 3a****Table 1 Crystal data and structure refinement for 3a.**

|                                             |                                                                 |
|---------------------------------------------|-----------------------------------------------------------------|
| Identification code                         | <b>3a</b>                                                       |
| Empirical formula                           | C <sub>23</sub> H <sub>18</sub> Cl <sub>3</sub> NO <sub>2</sub> |
| Formula weight                              | 446.73                                                          |
| Temperature/K                               | 193.0                                                           |
| Crystal system                              | orthorhombic                                                    |
| Space group                                 | P2 <sub>1</sub> 2 <sub>1</sub> 2 <sub>1</sub>                   |
| a/Å                                         | 5.5787(5)                                                       |
| b/Å                                         | 13.2751(9)                                                      |
| c/Å                                         | 27.4431(18)                                                     |
| α/°                                         | 90                                                              |
| β/°                                         | 90                                                              |
| γ/°                                         | 90                                                              |
| Volume/Å <sup>3</sup>                       | 2032.4(3)                                                       |
| Z                                           | 4                                                               |
| ρ <sub>calc</sub> /g/cm <sup>3</sup>        | 1.460                                                           |
| μ/mm <sup>-1</sup>                          | 0.471                                                           |
| F(000)                                      | 920.0                                                           |
| Crystal size/mm <sup>3</sup>                | 0.120 × 0.110 × 0.080                                           |
| Radiation                                   | MoKα (λ = 0.71073)                                              |
| 2θ range for data collection/°              | 3.408 to 55.04                                                  |
| Index ranges                                | -6 ≤ h ≤ 7, -16 ≤ k ≤ 17, -35 ≤ l ≤ 35                          |
| Reflections collected                       | 19100                                                           |
| Independent reflections                     | 4684 [R <sub>int</sub> = 0.0531, R <sub>sigma</sub> = 0.0487]   |
| Data/restraints/parameters                  | 4684/0/262                                                      |
| Goodness-of-fit on F <sup>2</sup>           | 1.084                                                           |
| Final R indexes [I ≥ 2σ (I)]                | R <sub>1</sub> = 0.0402, wR <sub>2</sub> = 0.0711               |
| Final R indexes [all data]                  | R <sub>1</sub> = 0.0527, wR <sub>2</sub> = 0.0775               |
| Largest diff. peak/hole / e Å <sup>-3</sup> | 0.24/-0.31                                                      |
| Flack parameter                             | 0.04(3)                                                         |

## References

- 1 (a) Y. You, L. Zhang, L. Cui, X. Mi, S. Luo, *Angew. Chem. Int. Ed.*, 2017, **56**, 13814-13818; (b) Y. You, S. Luo, *Org. Lett.*, 2018, **20**, 7137-7140.
- 2 (a) K. Okamoto, T. Hayashi, V. H. Rawal, *Chem. Commun.*, 2009, **32**, 4815-4817; (b) C. Bomio, M. A. Kabeshov, A. R. Lit, S. H. Lau, J. Ehlert, C. Battilocchio, S. V. Ley, *Chem. Sci.*, 2017, **8**, 6071-6075.
- 3 S. Morales, F. G. Guijarro, J. Luis, G. Ruano, M. B. Cid, *J. Am. Chem. Soc.*, 2014, **136**, 1082-1089.
- 4 I. L. Roy, D. Mouysset, S. Mignani, M. Vuilhorgne, L. Stella, *Tetrahedron*, 2003, **59**, 3719-3727.
- 5 T. Johnson, B. Luo, M. Lautens, *J. Org. Chem.*, 2016, **81**, 4923-4930.

## NMR spectra

$^1\text{H}$  NMR of **3a** (600 MHz,  $\text{CDCl}_3$ )

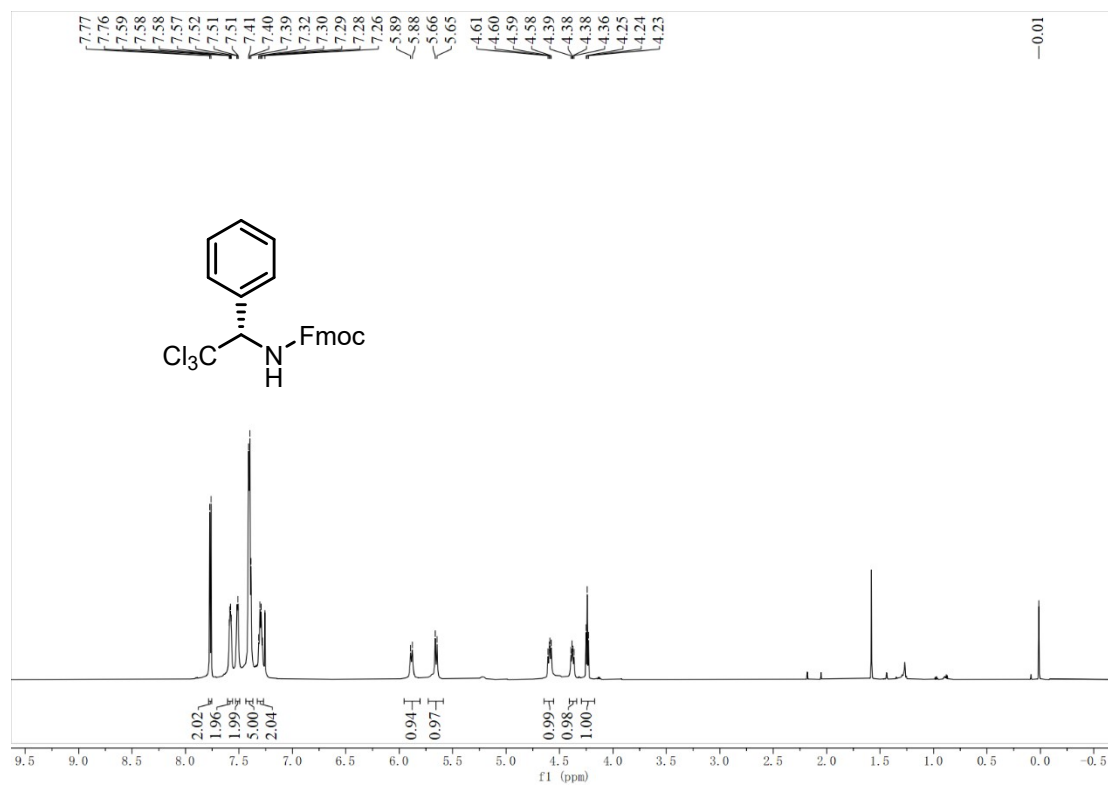

$^{13}\text{C}$  NMR of **3a** (151 MHz,  $\text{CDCl}_3$ )

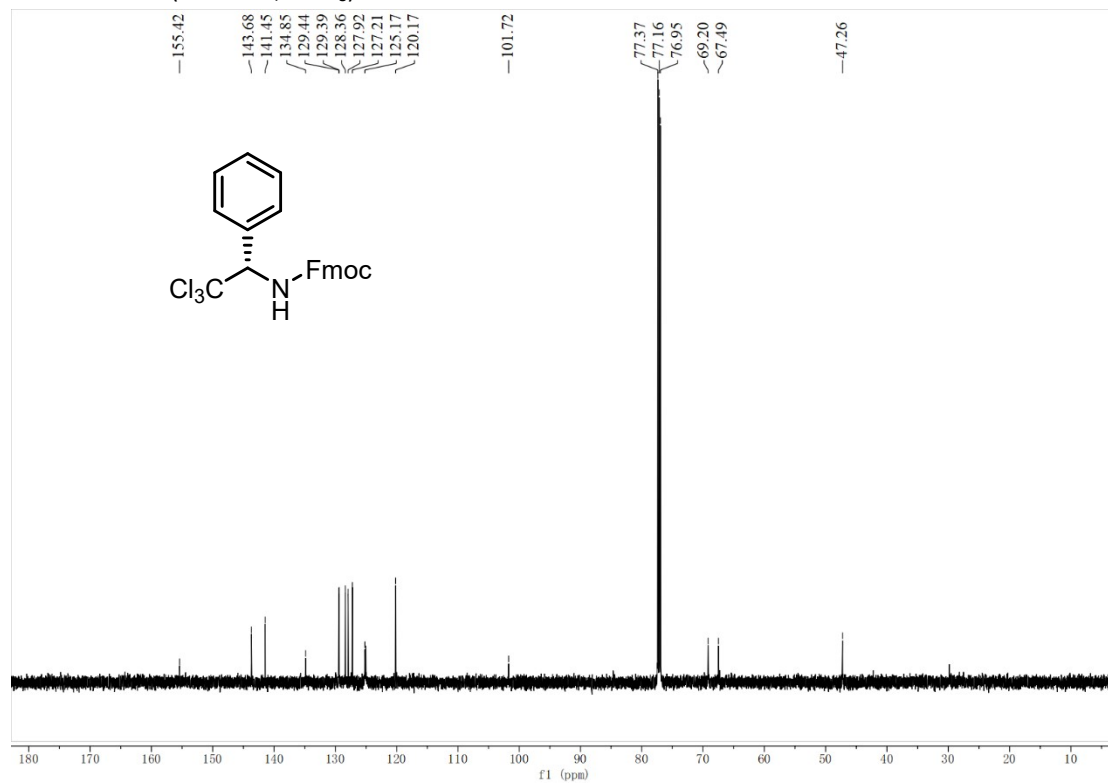

<sup>1</sup>H NMR of **3b** (600 MHz, CDCl<sub>3</sub>)

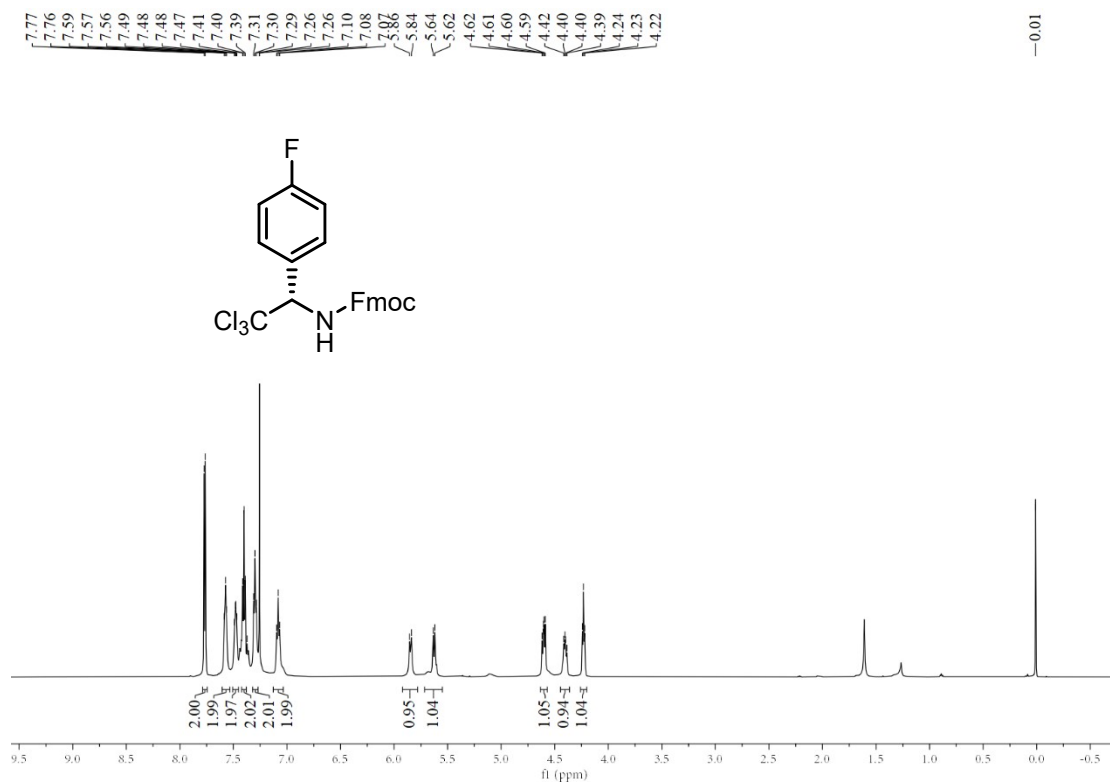

<sup>13</sup>C NMR of **3b** (151 MHz, CDCl<sub>3</sub>)

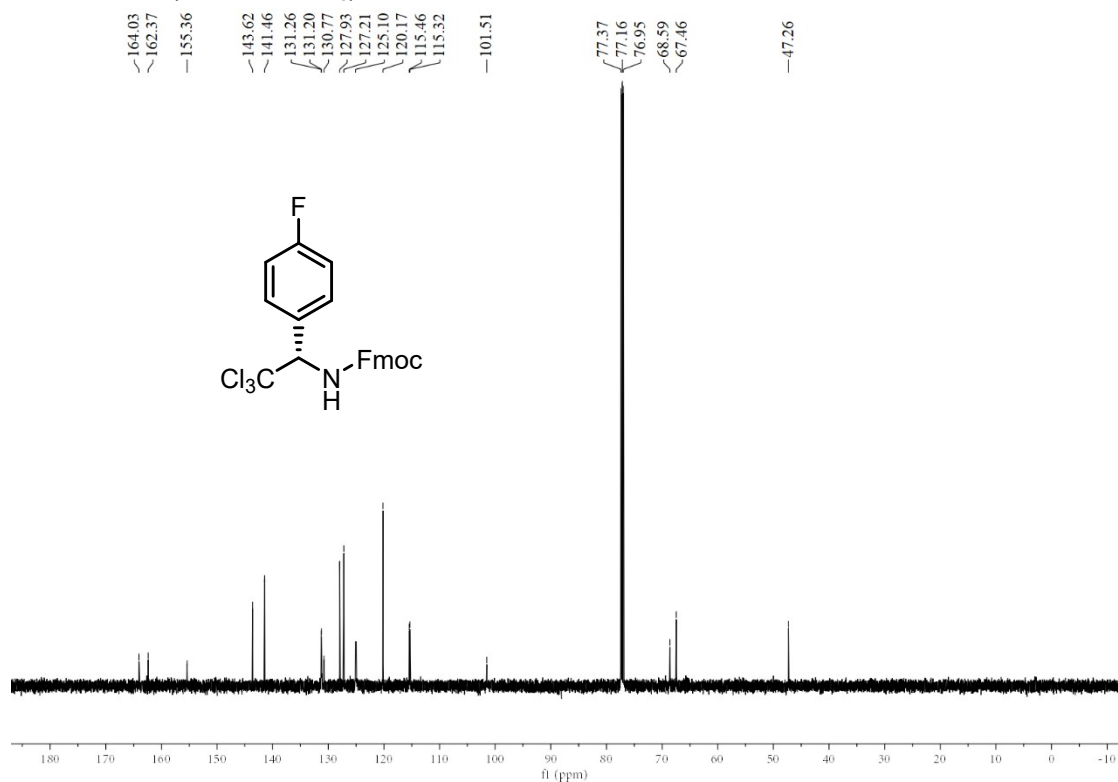

$^{19}\text{F}$  NMR of **3b** (564 MHz,  $\text{CDCl}_3$ )

—112.02

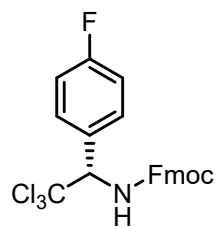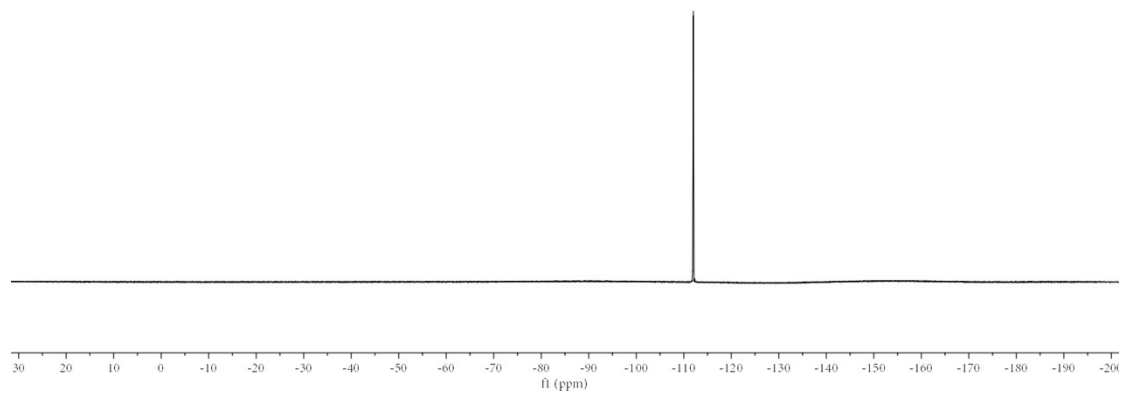

$^1\text{H}$  NMR of **3c** (600 MHz,  $\text{CDCl}_3$ )

7.78, 7.77, 7.59, 7.58, 7.57, 7.45, 7.43, 7.42, 7.41, 7.40, 7.37, 7.36, 7.32, 7.30, 7.29, 7.26, 5.97, 5.95, 5.64, 4.63, 4.62, 4.61, 4.60, 4.43, 4.42, 4.41, 4.40, 4.24, 4.23, 4.22

-0.04

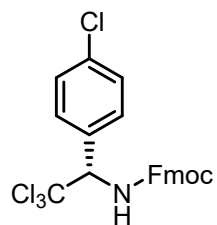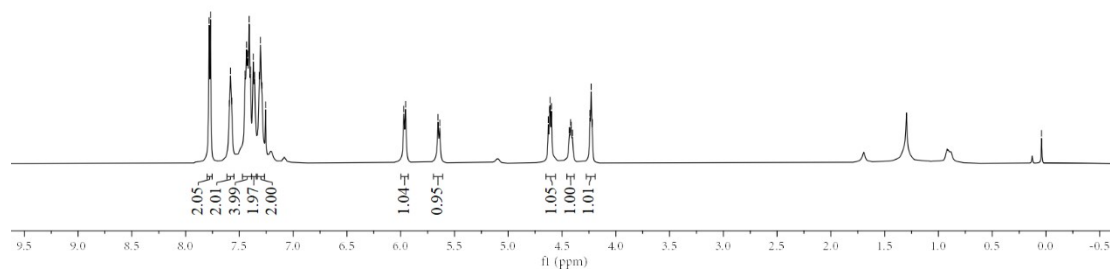

$^{13}\text{C}$  NMR of **3c** (151 MHz,  $\text{CDCl}_3$ )

155.35, 143.57, 141.43, 135.44, 133.34, 130.73, 128.55, 127.92, 125.07, 120.16, 101.23, 77.37, 77.16, 76.95, 68.65, 67.44, 47.22

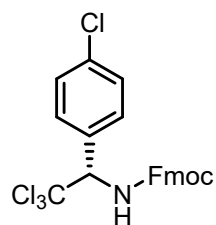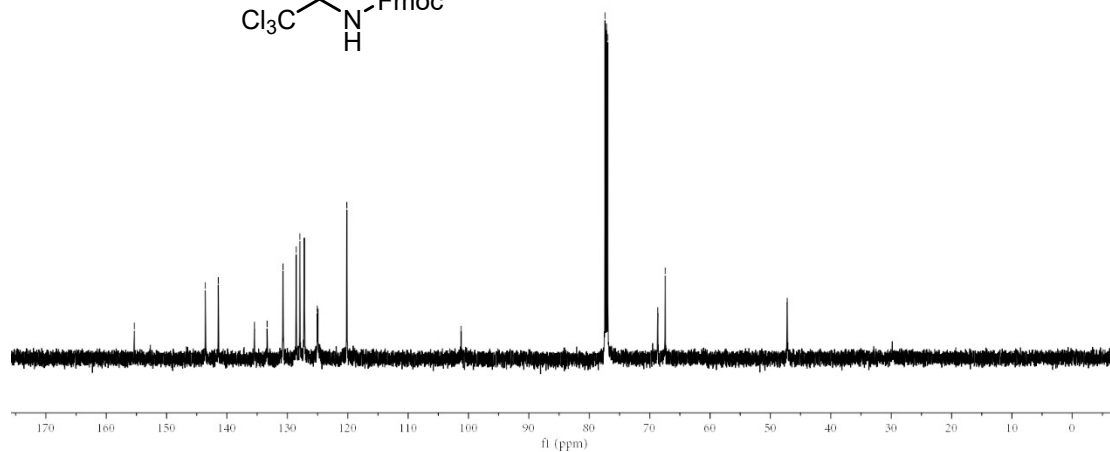

$^1\text{H}$  NMR of **3d** (600 MHz,  $\text{CDCl}_3$ )

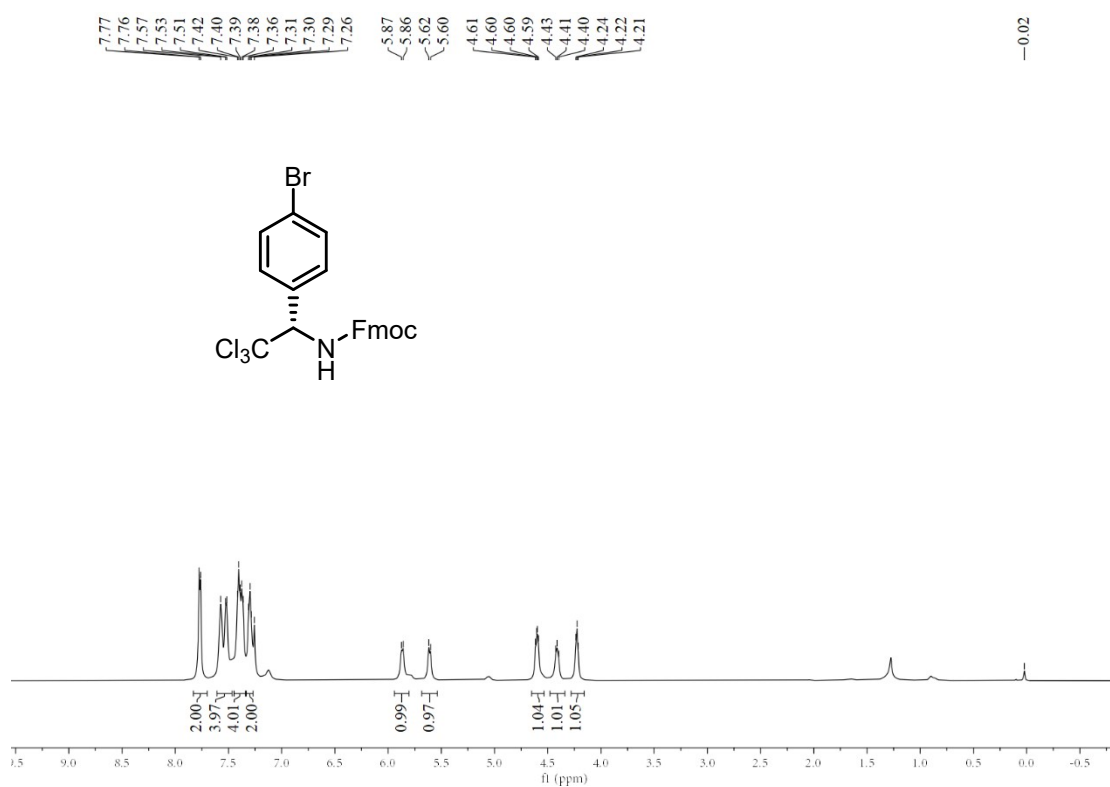

—0.02

$^{13}\text{C}$  NMR of **3d** (151 MHz,  $\text{CDCl}_3$ )

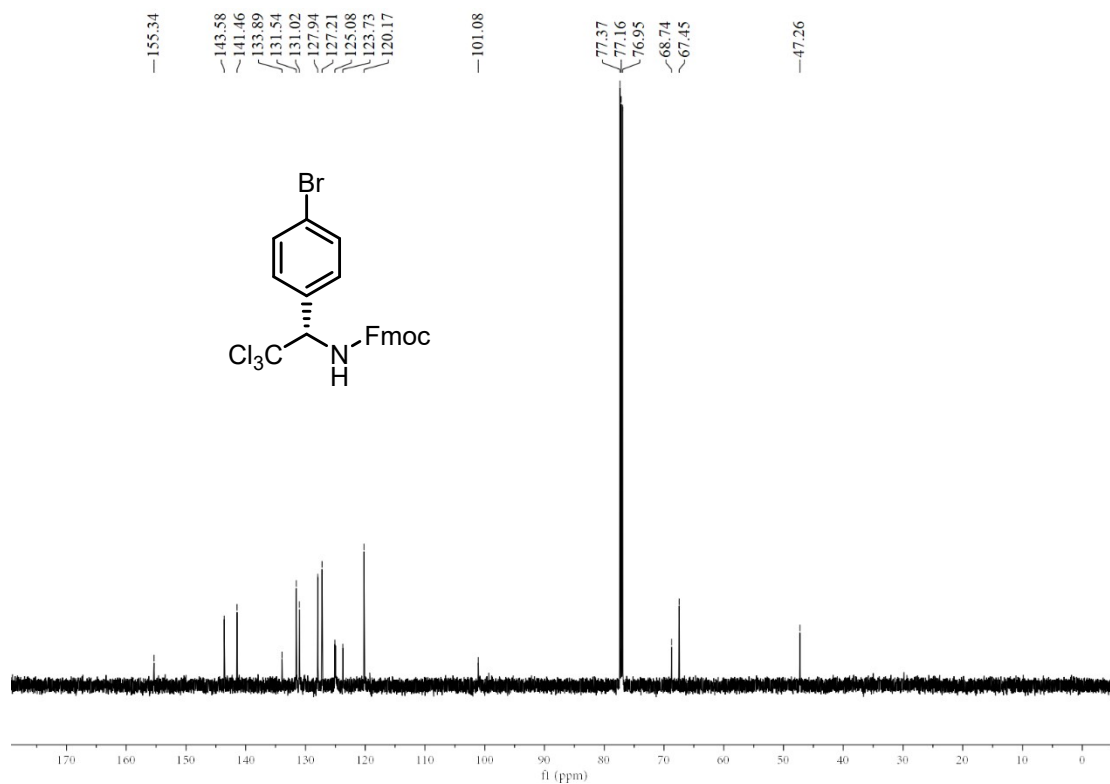

<sup>1</sup>H NMR of **3e** (600 MHz, CDCl<sub>3</sub>)

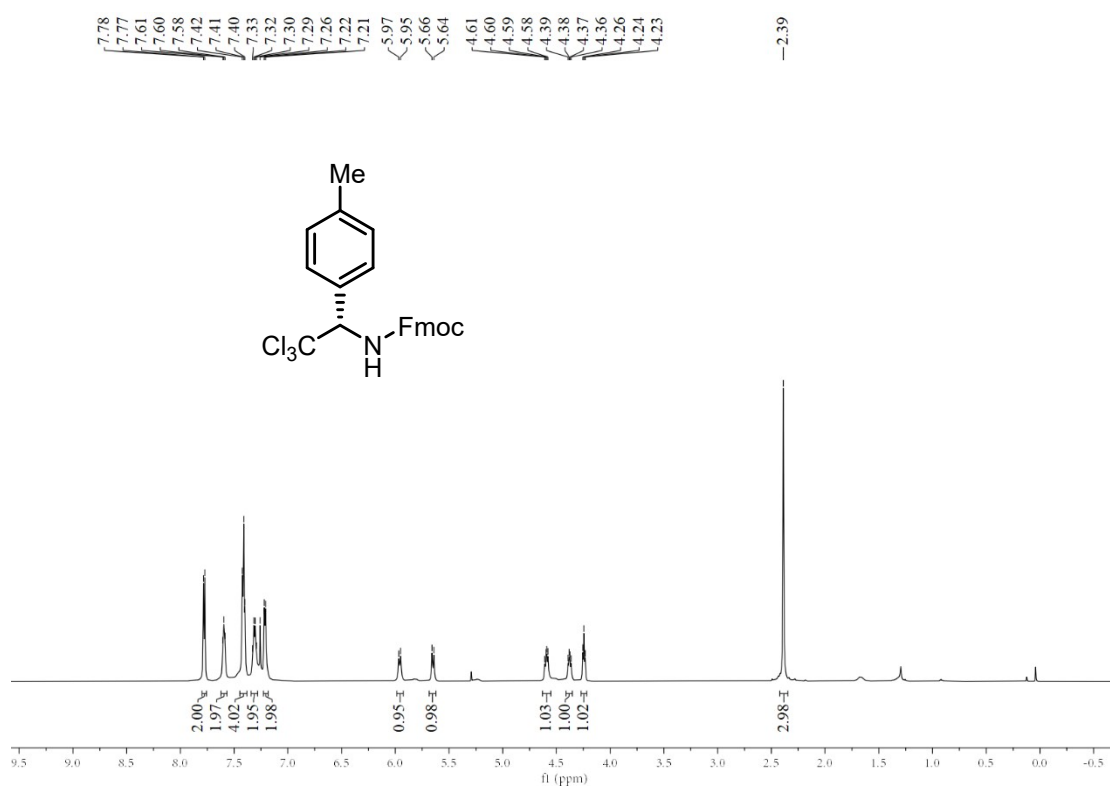

<sup>13</sup>C NMR of **3e** (151 MHz, CDCl<sub>3</sub>)

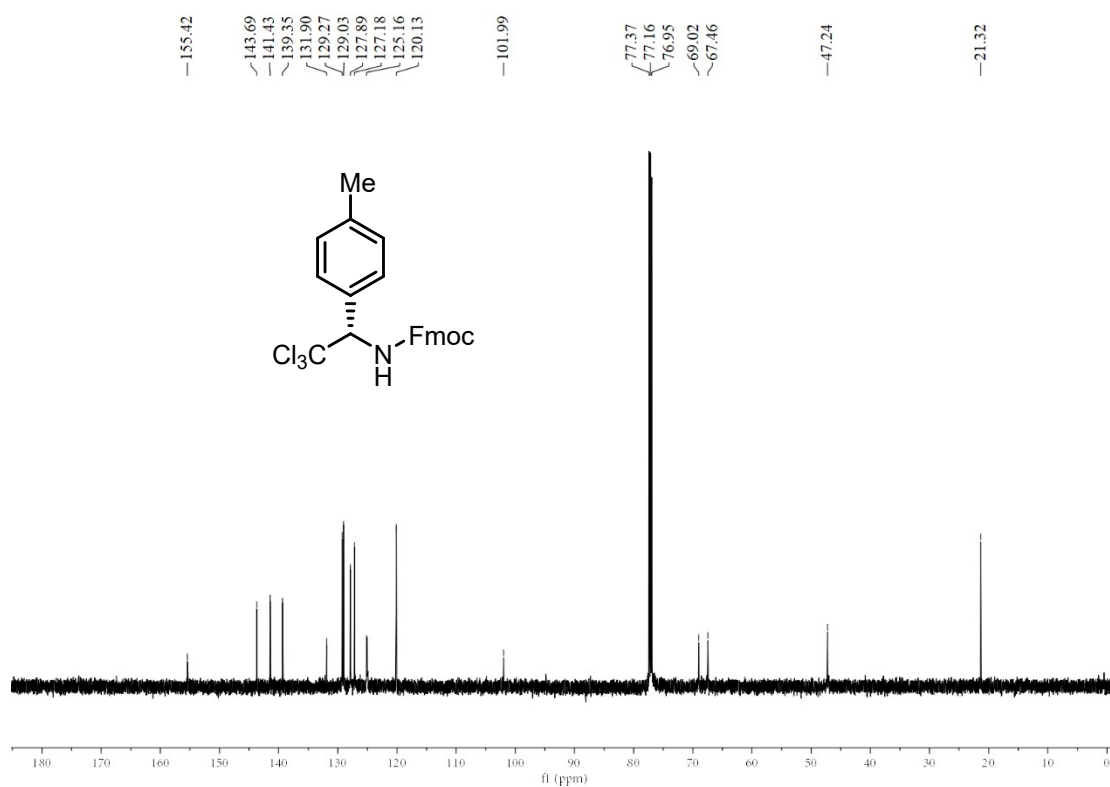



<sup>1</sup>H NMR of **3f** (600 MHz, CDCl<sub>3</sub>)

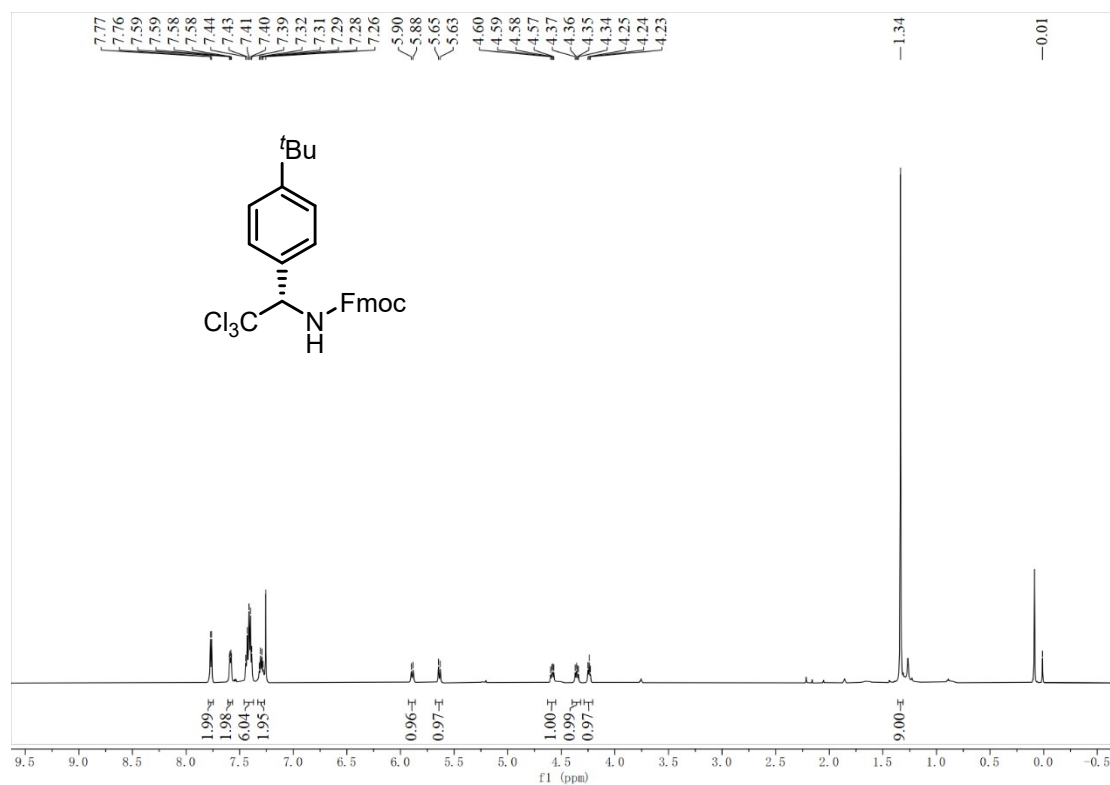

<sup>13</sup>C NMR of **3f** (151 MHz, CDCl<sub>3</sub>)

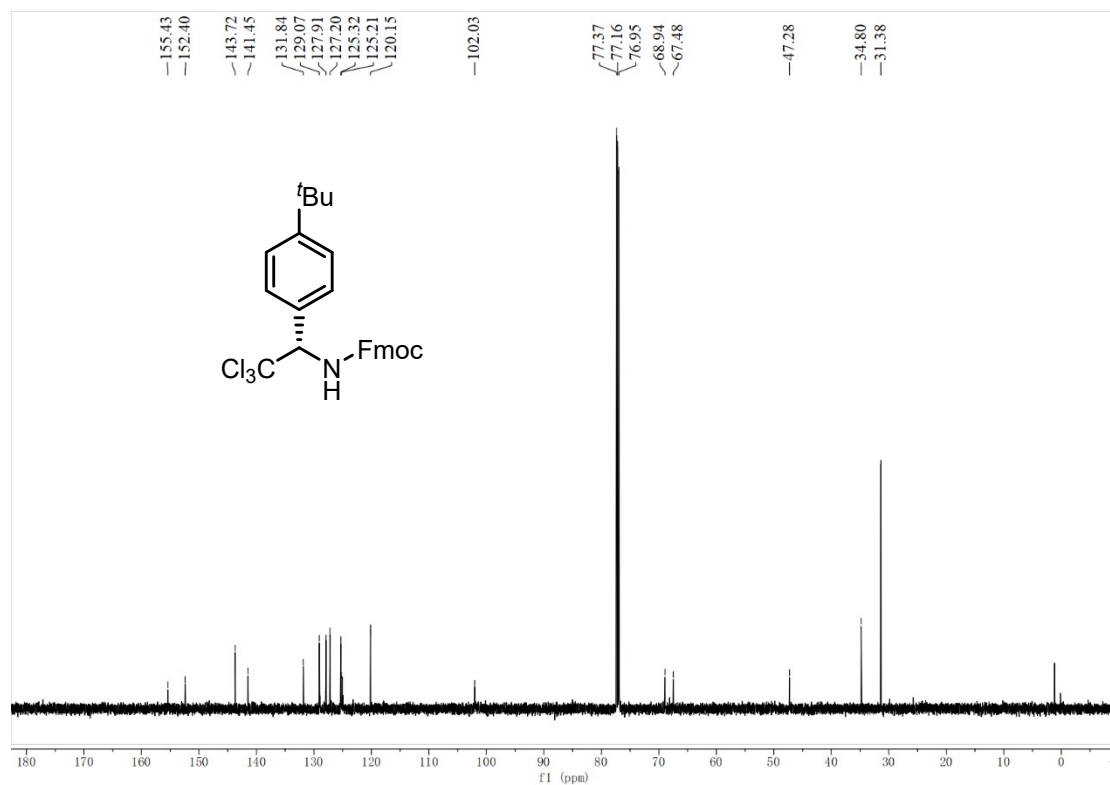

$^1\text{H}$  NMR of **3g** (600 MHz,  $\text{CDCl}_3$ )

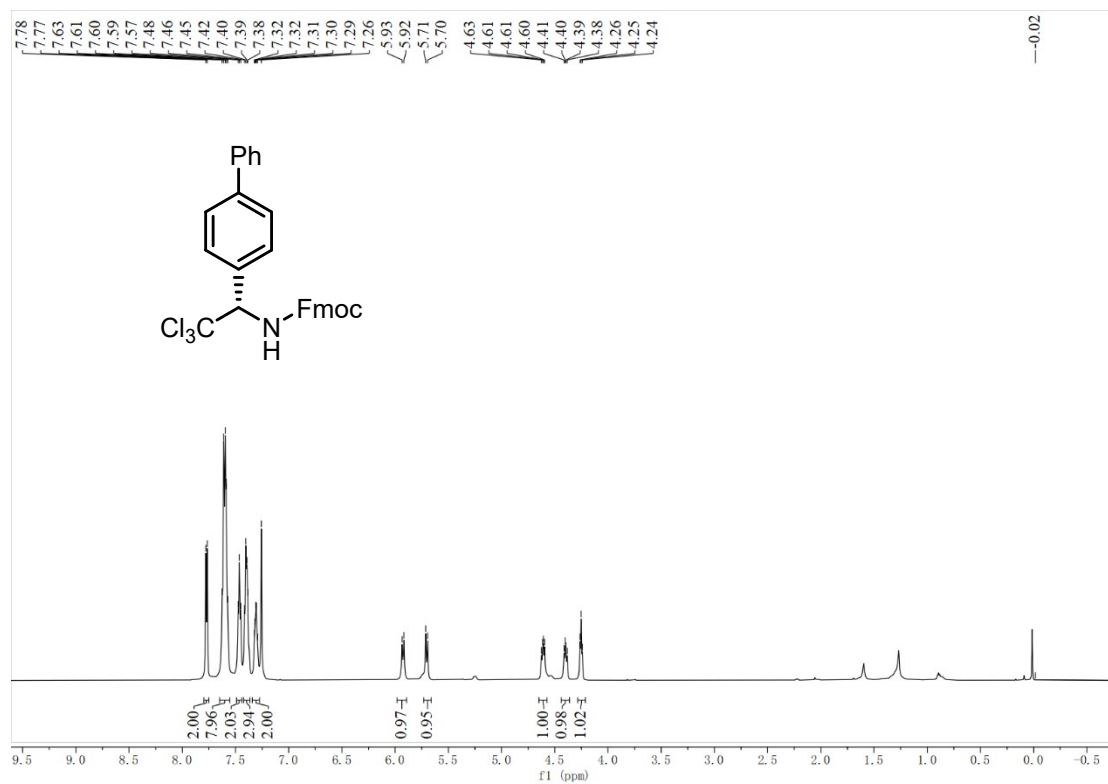

$^{13}\text{C}$  NMR of **3g** (151 MHz,  $\text{CDCl}_3$ )

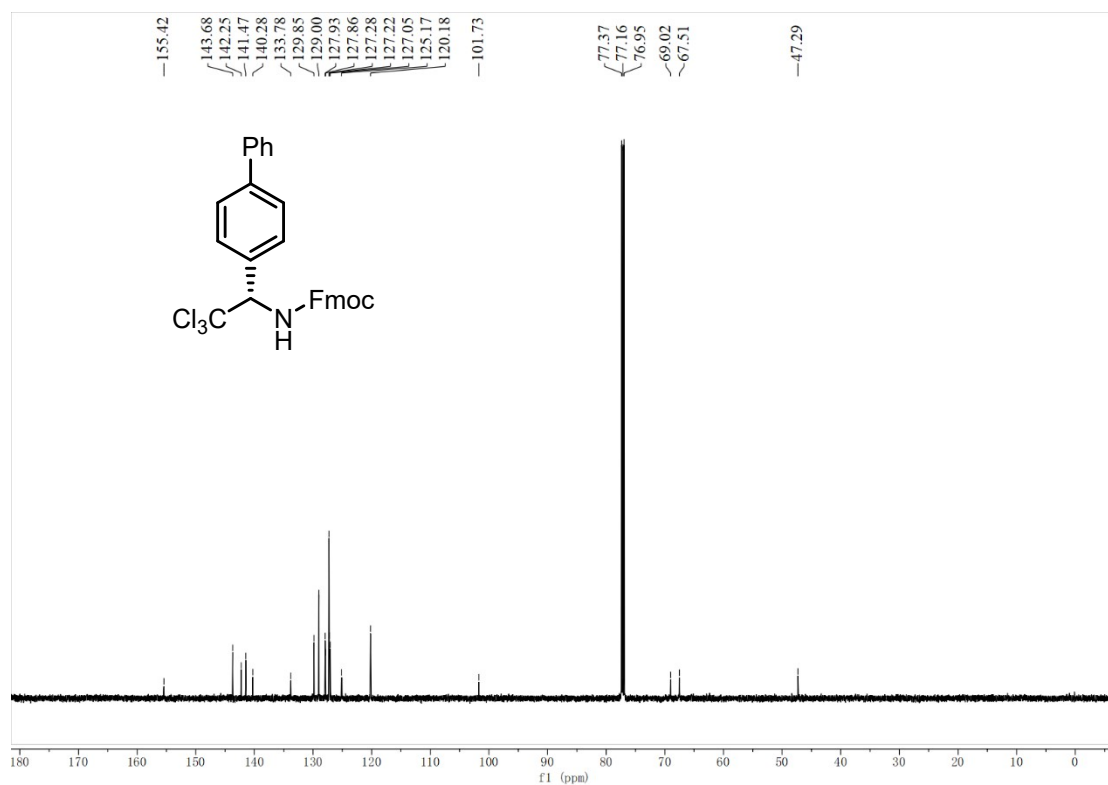

<sup>1</sup>H NMR of **3h** (600 MHz, CDCl<sub>3</sub>)

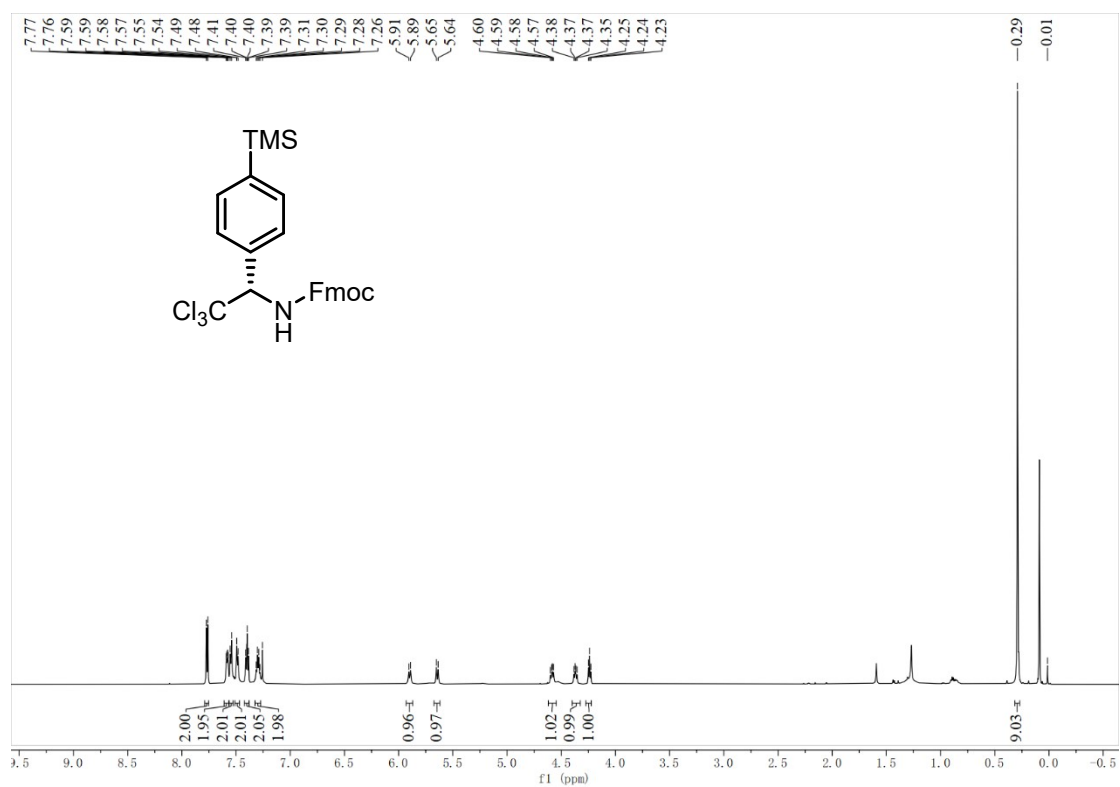

<sup>13</sup>C NMR of **3h** (151 MHz, CDCl<sub>3</sub>)

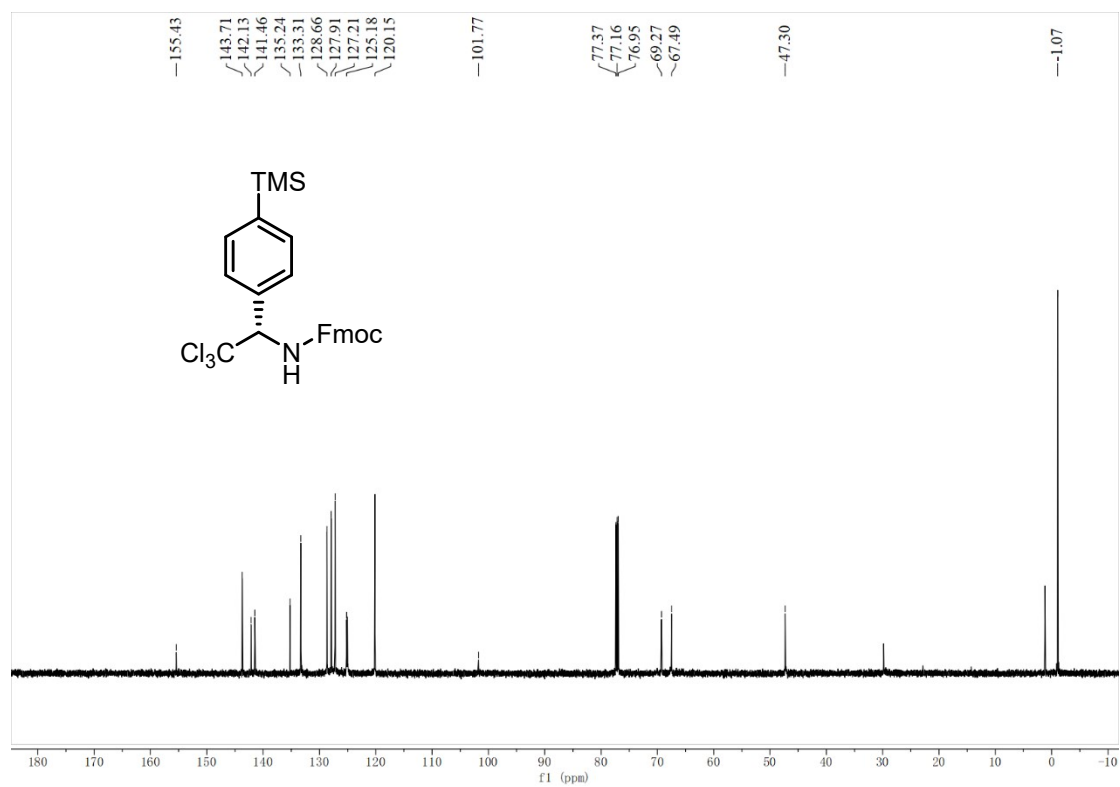

<sup>1</sup>H NMR of **3i** (600 MHz, CDCl<sub>3</sub>)

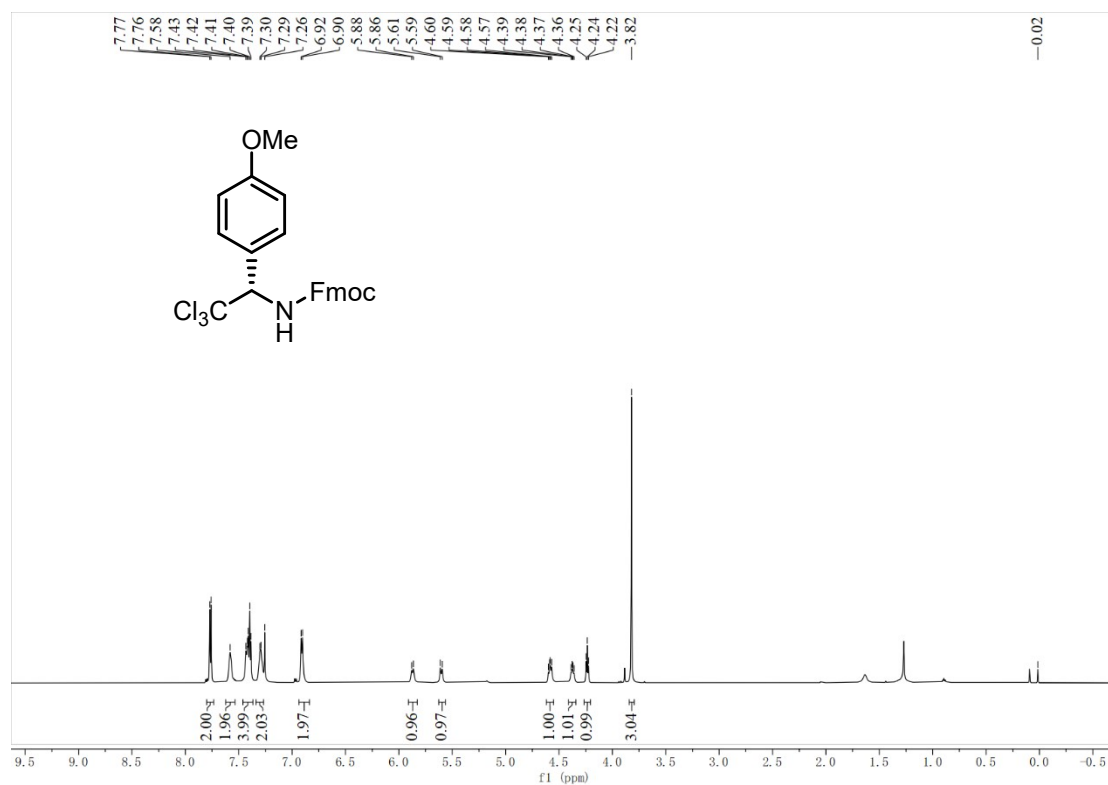

<sup>13</sup>C NMR of **3i** (151 MHz, CDCl<sub>3</sub>)

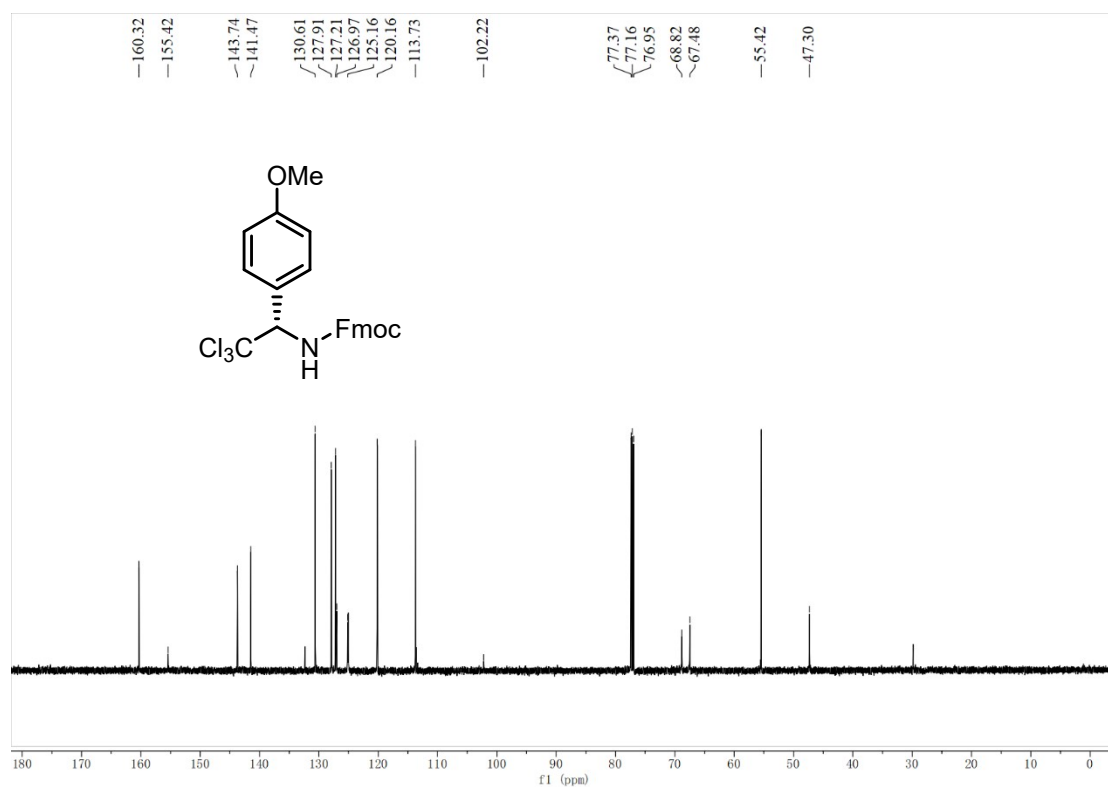

<sup>1</sup>H NMR of **3j** (600 MHz, CDCl<sub>3</sub>)

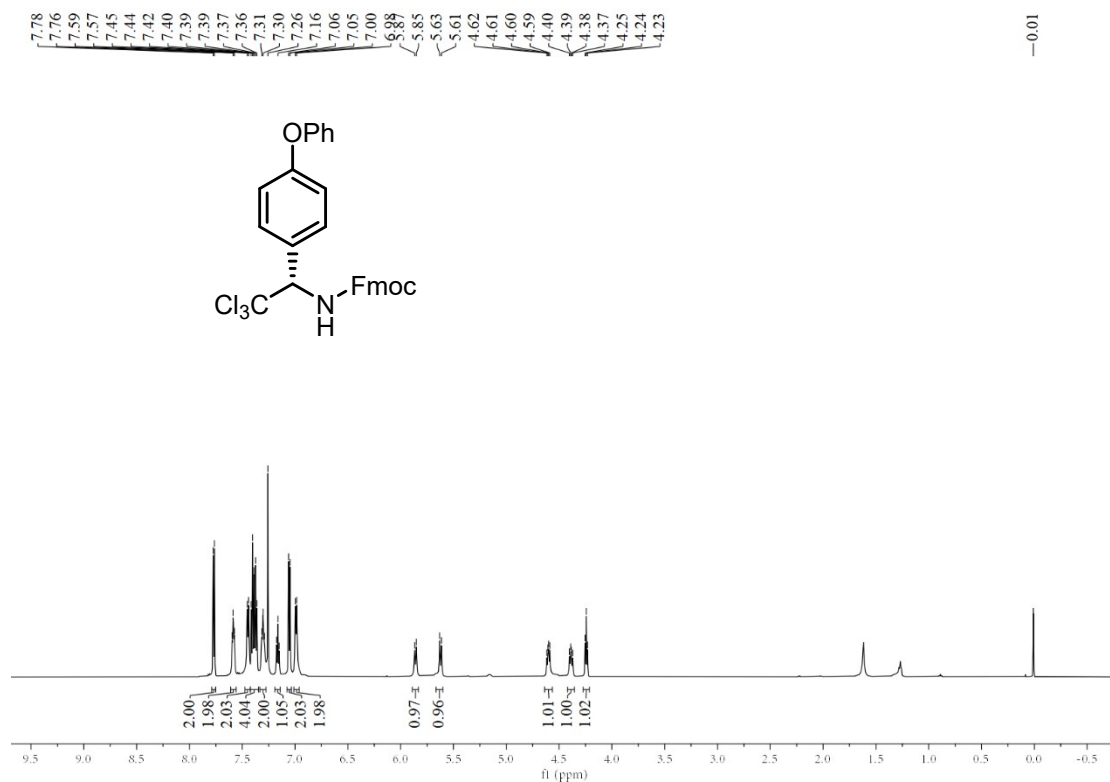

-0.01

<sup>13</sup>C NMR of **3j** (151 MHz, CDCl<sub>3</sub>)

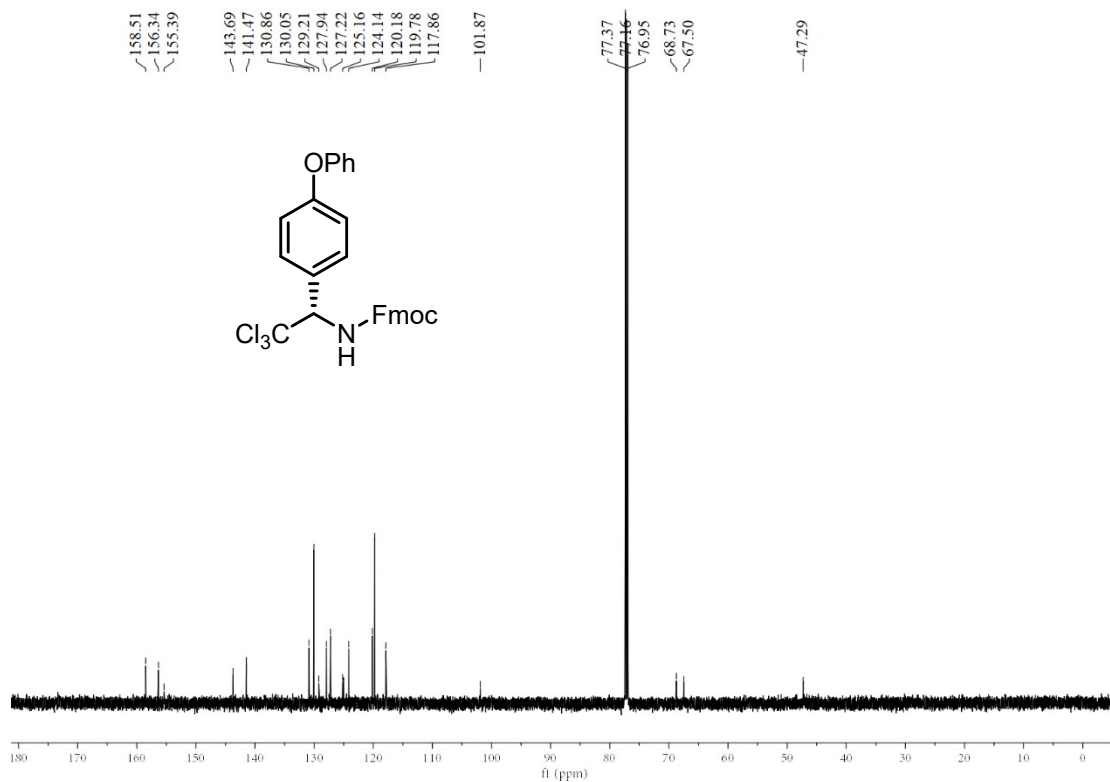

<sup>1</sup>H NMR of **3k** (600 MHz, CDCl<sub>3</sub>)

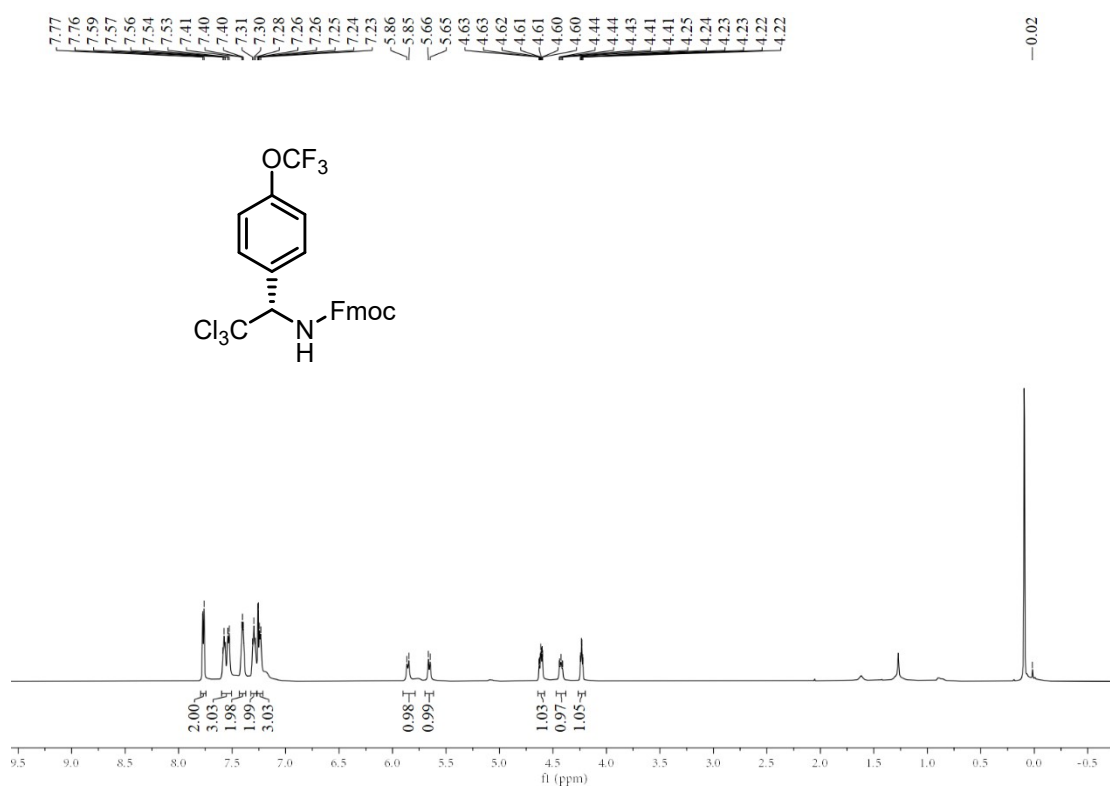

<sup>13</sup>C NMR of **3k** (151 MHz, CDCl<sub>3</sub>)

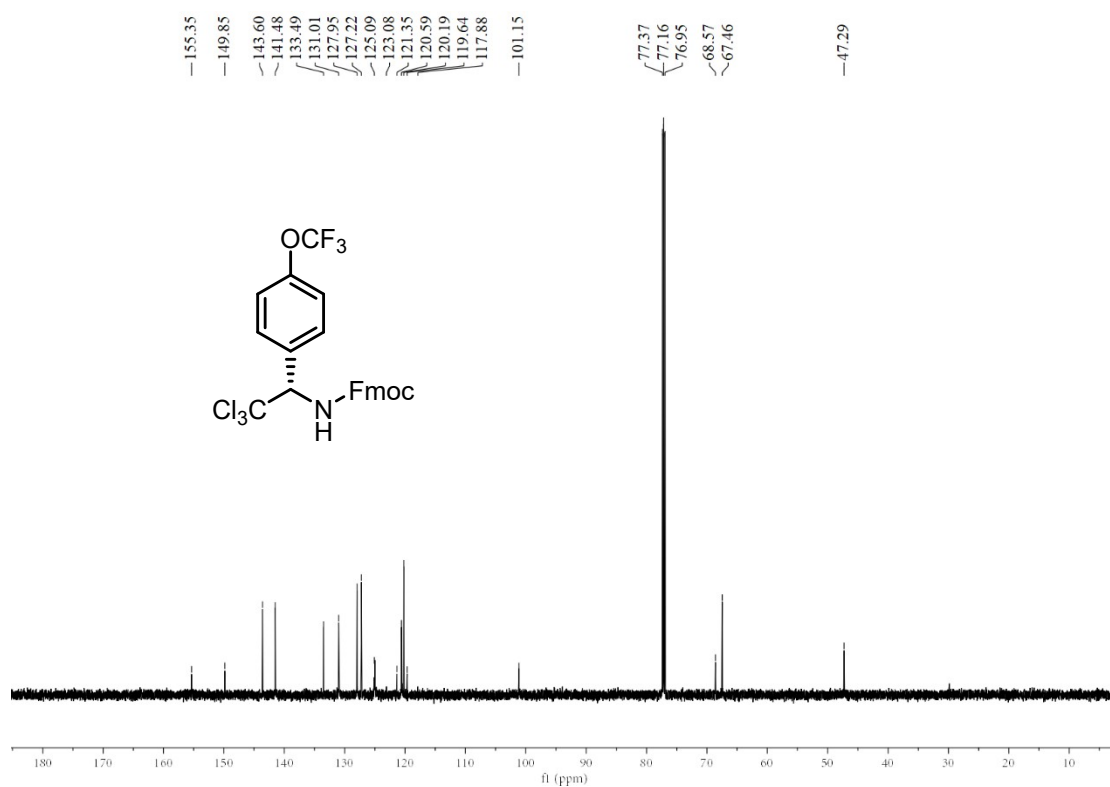

$^{19}\text{F}$  NMR of **3k** (564 MHz,  $\text{CDCl}_3$ )

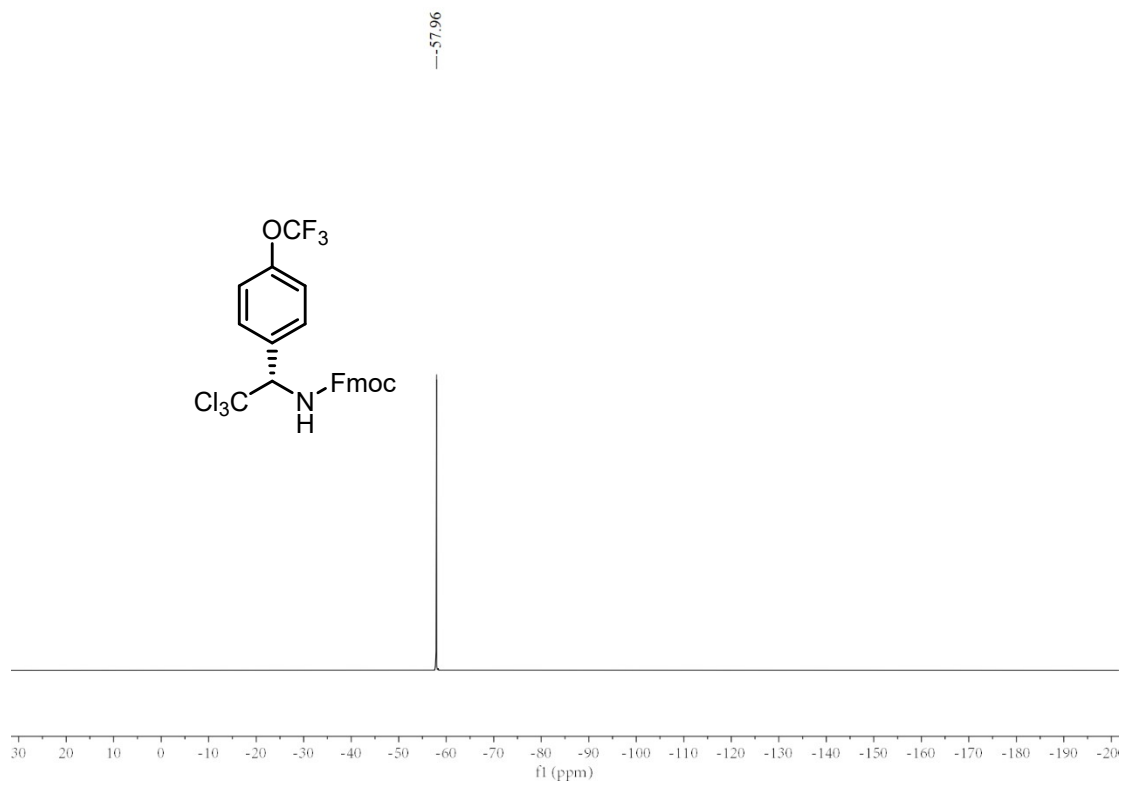

<sup>1</sup>H NMR of **3I** (600 MHz, CDCl<sub>3</sub>)

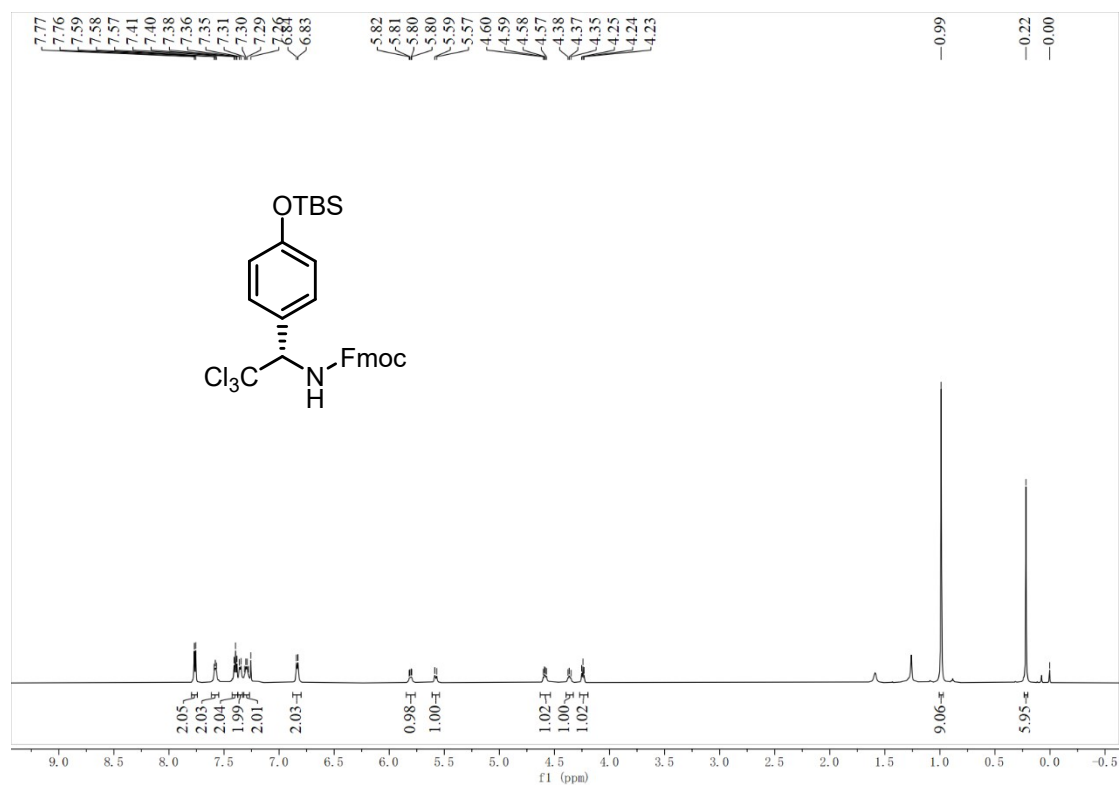

<sup>13</sup>C NMR of **3I** (151 MHz, CDCl<sub>3</sub>)

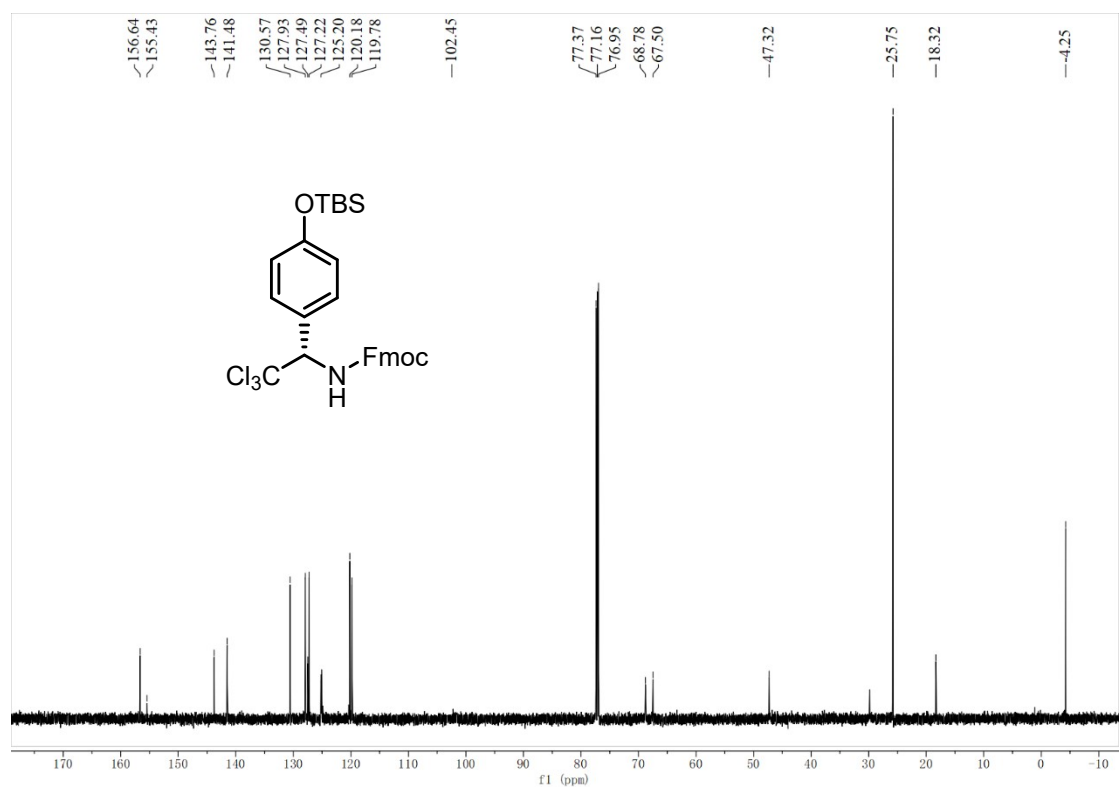



<sup>1</sup>H NMR of **3m** (600 MHz, CDCl<sub>3</sub>)

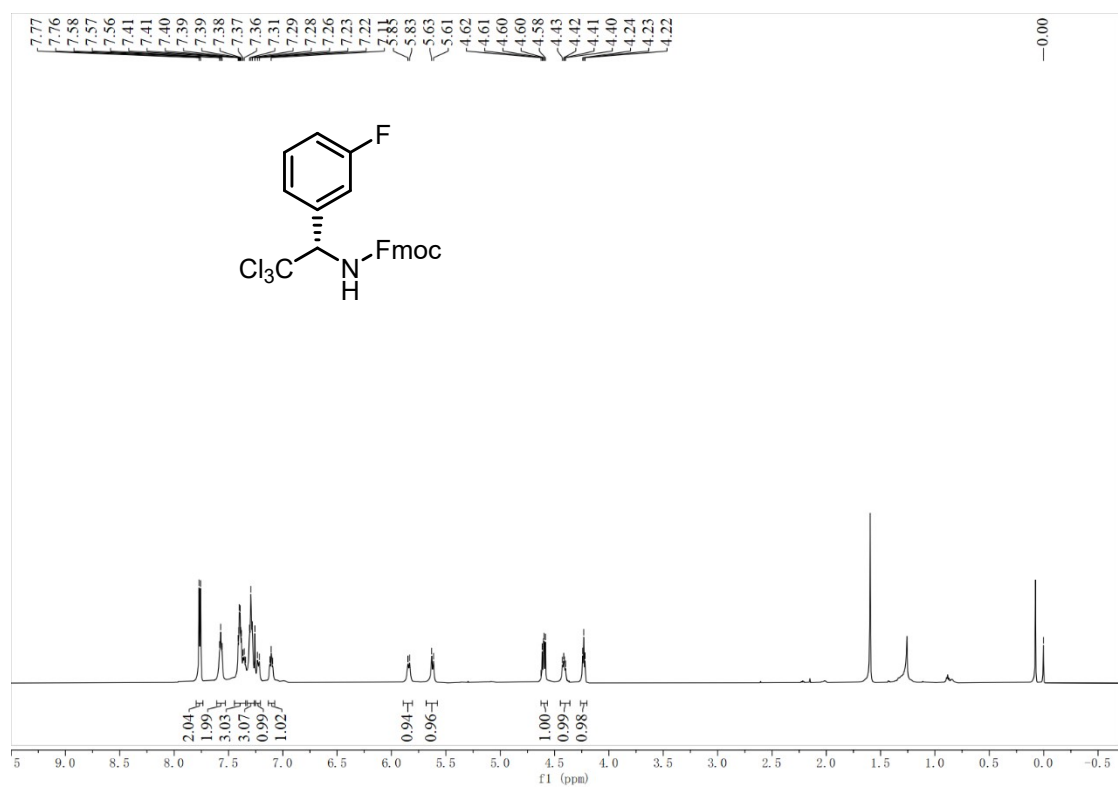

<sup>13</sup>C NMR of **3m** (151 MHz, CDCl<sub>3</sub>)

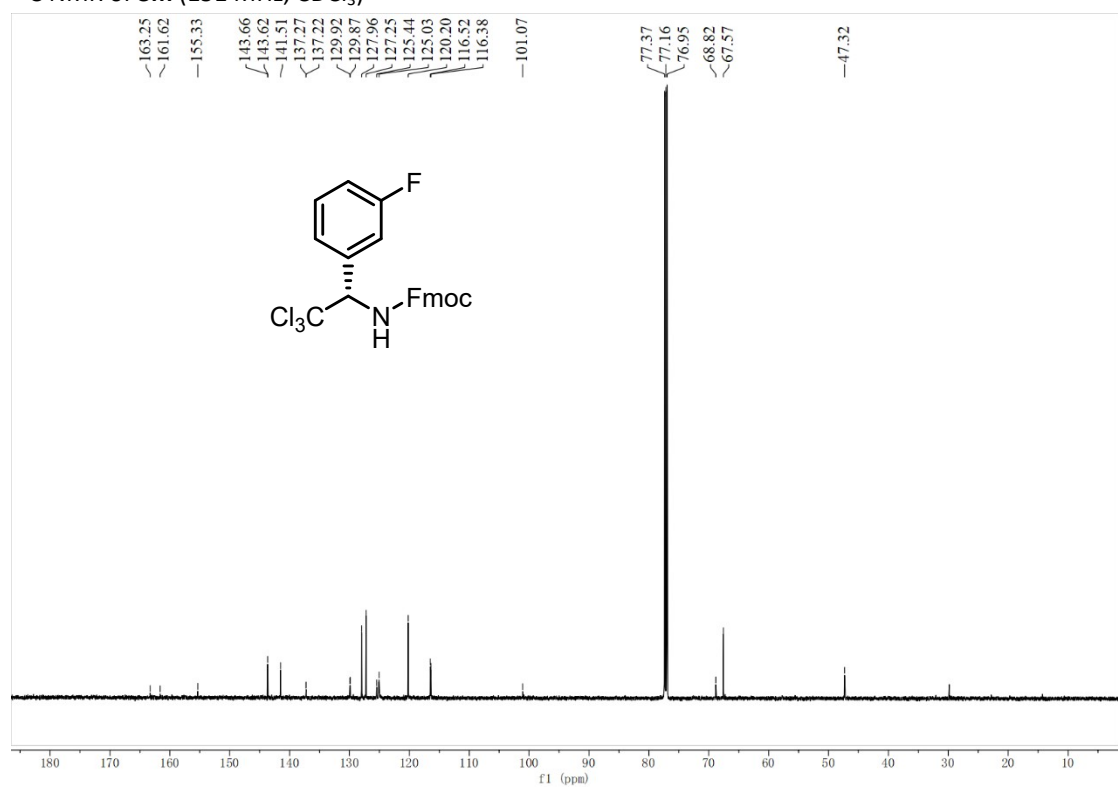

<sup>19</sup>F NMR of **3m** (377 MHz, CDCl<sub>3</sub>)

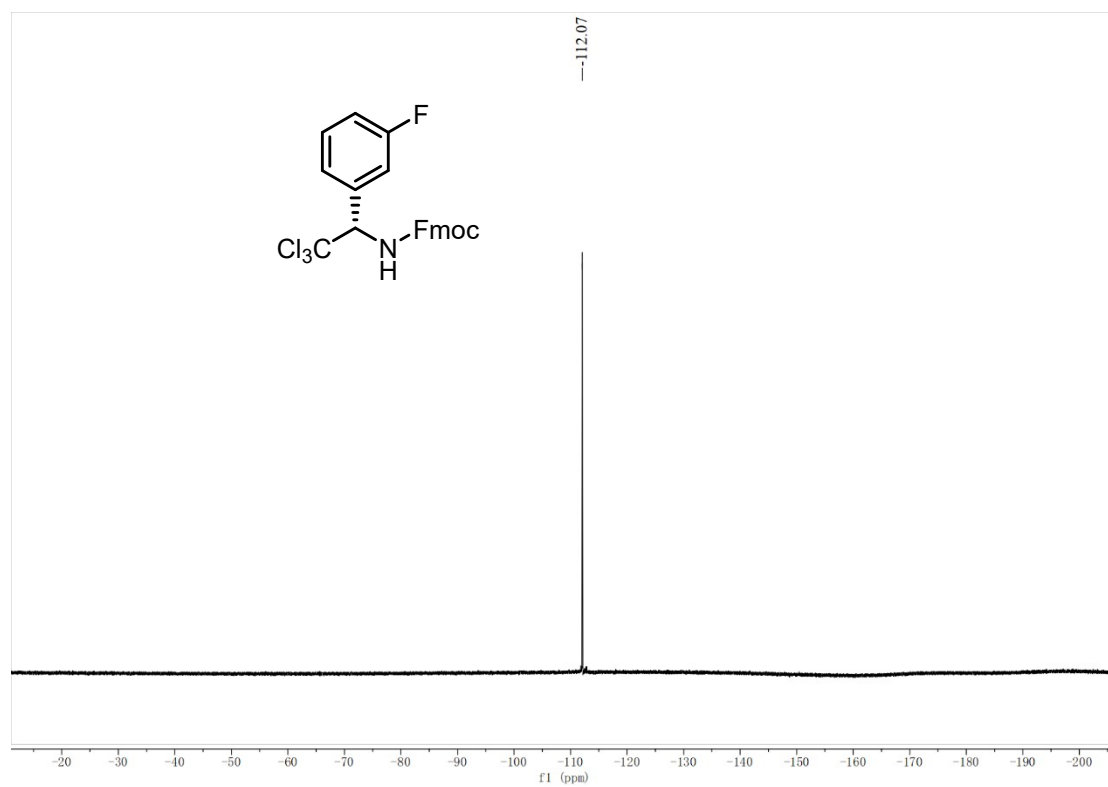

<sup>1</sup>H NMR of **3n** (600 MHz, CDCl<sub>3</sub>)

7.78, 7.77, 7.60, 7.59, 7.58, 7.42, 7.41, 7.40, 7.32, 7.29, 7.28, 7.26, 7.23, 7.22, 5.95, 5.93, 5.64, 5.63, 4.62, 4.61, 4.59, 4.39, 4.38, 4.36, 4.26, 4.25, 4.24, -2.40, -0.03

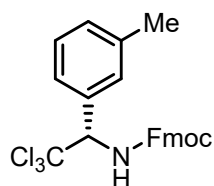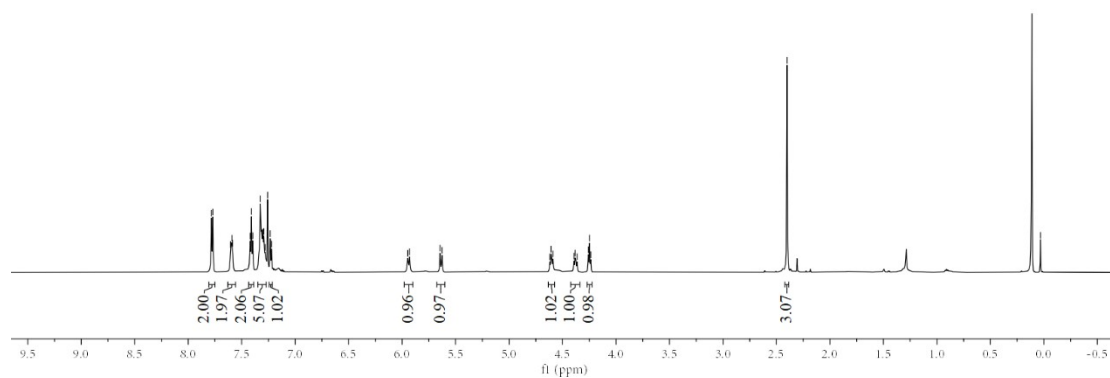

<sup>13</sup>C NMR of **3n** (151 MHz, CDCl<sub>3</sub>)

155.44, 143.67, 141.42, 138.05, 134.77, 130.20, 130.11, 128.22, 127.89, 127.18, 126.37, 125.16, 120.13, 101.78, 77.37, 77.16, 76.95, 69.22, 67.45, 47.23, 21.60

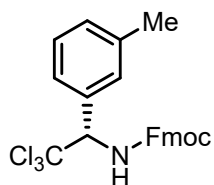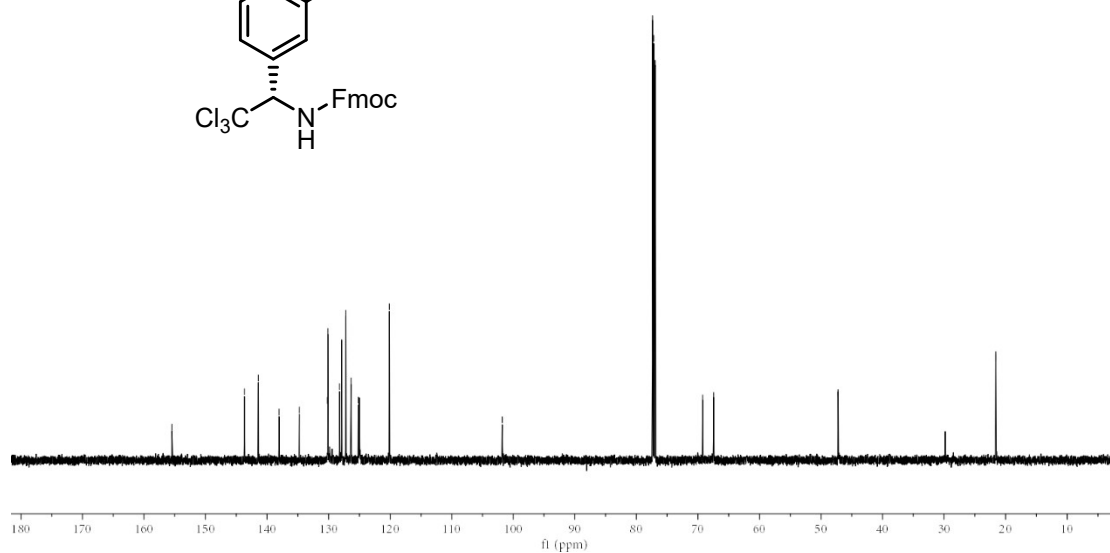

<sup>1</sup>H NMR of **3o** (600 MHz, CDCl<sub>3</sub>)

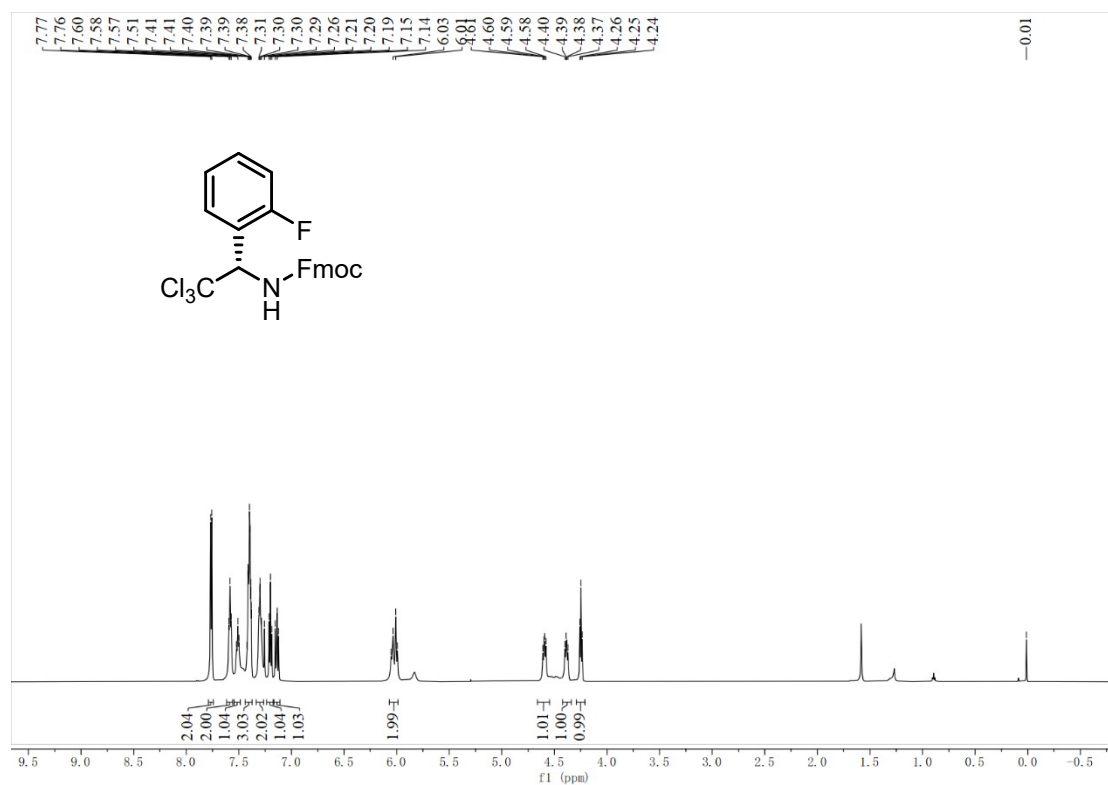

<sup>13</sup>C NMR of **3o** (151 MHz, CDCl<sub>3</sub>)

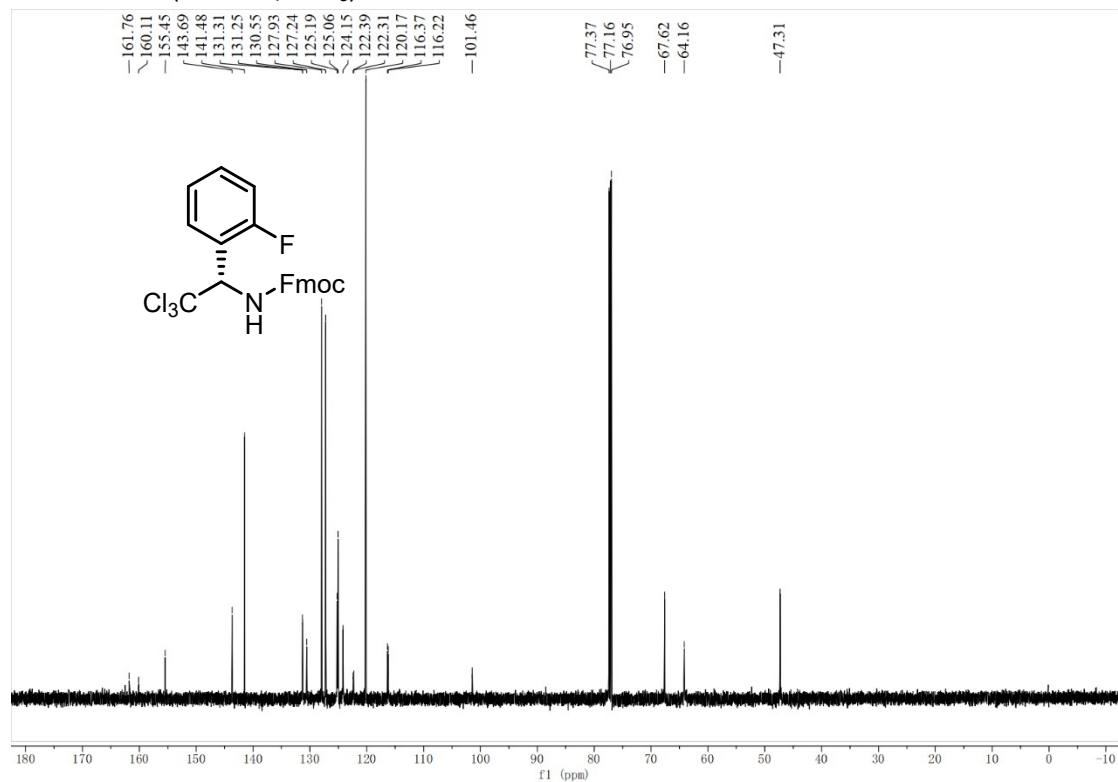

<sup>19</sup>F NMR of **3o** (564 MHz, CDCl<sub>3</sub>)

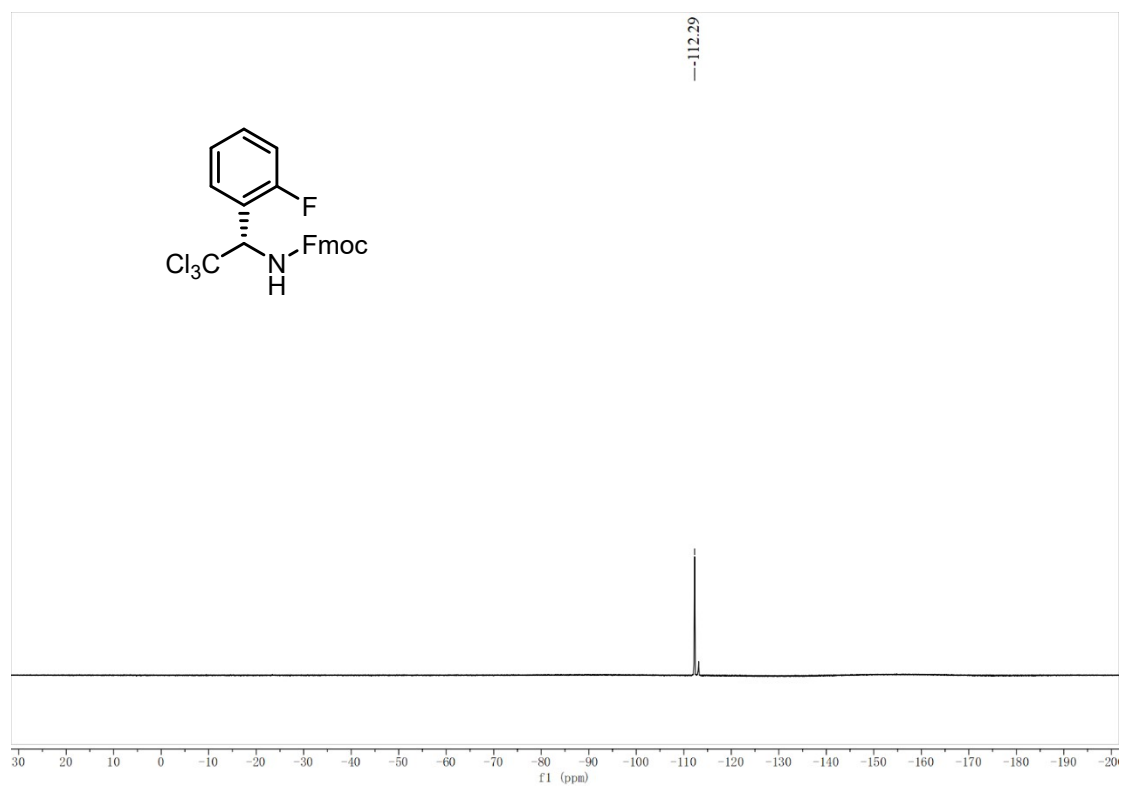

<sup>1</sup>H NMR of **3p** (600 MHz, CDCl<sub>3</sub>)

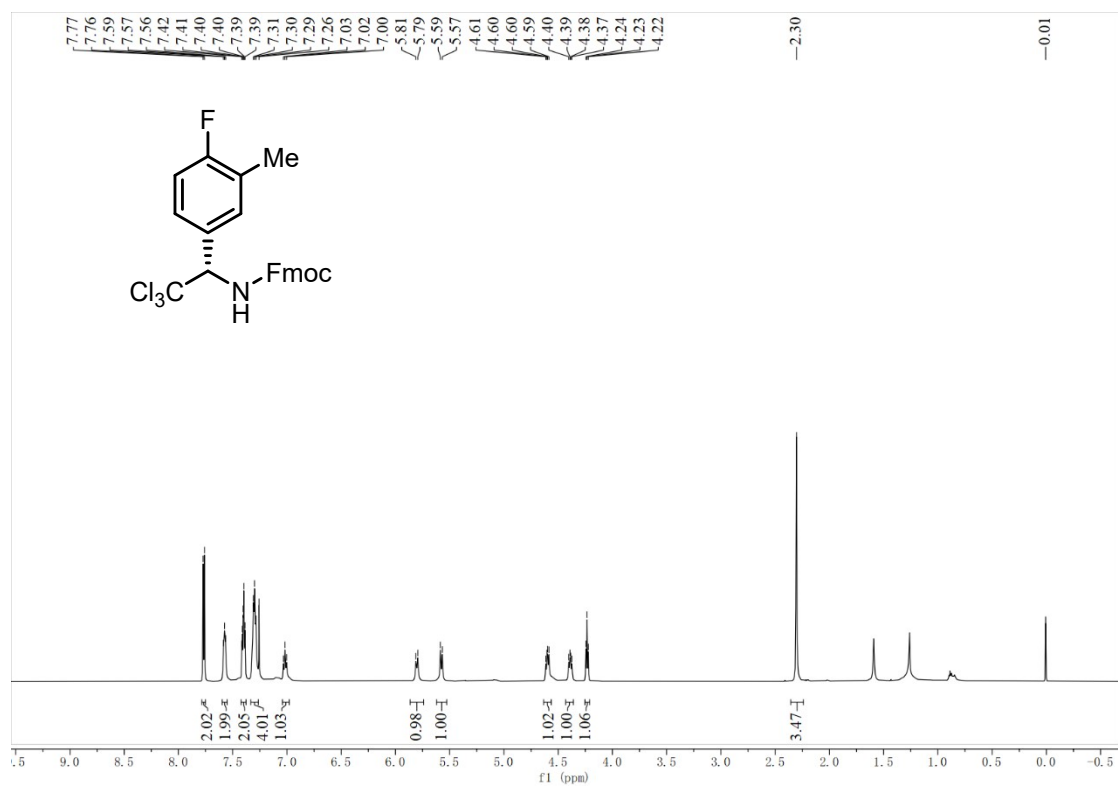

<sup>13</sup>C NMR of **3p** (151 MHz, CDCl<sub>3</sub>)

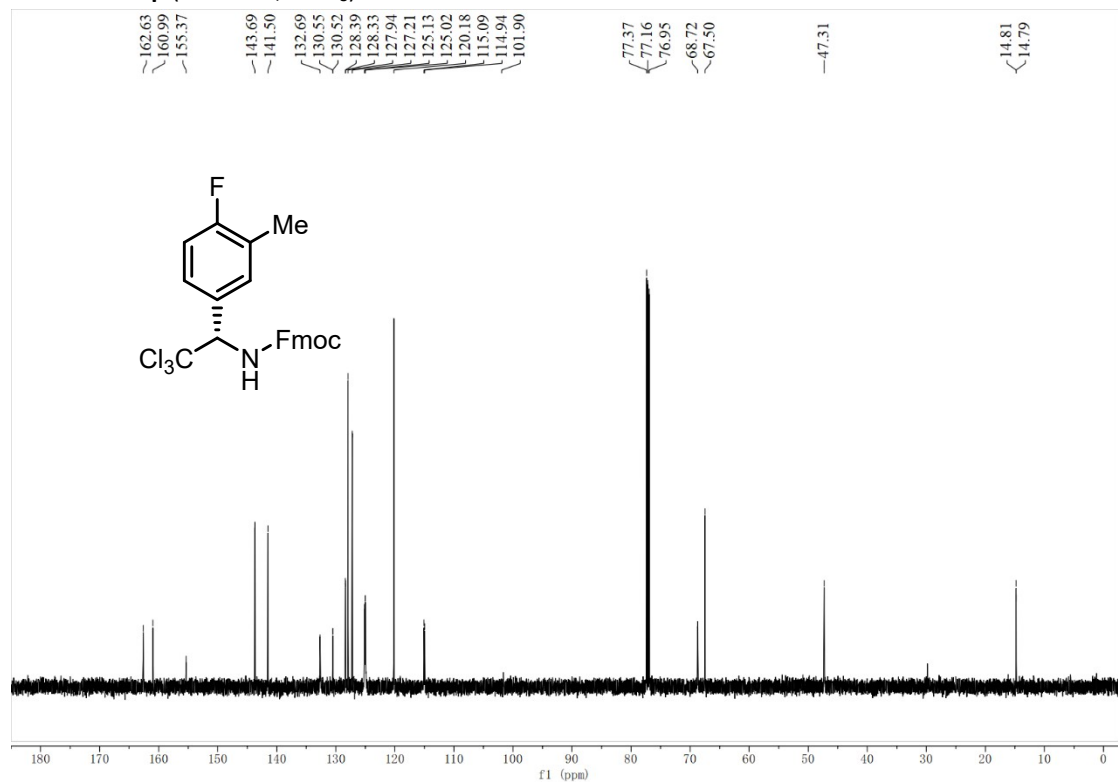

<sup>19</sup>F NMR of **3p** (564 MHz, CDCl<sub>3</sub>)

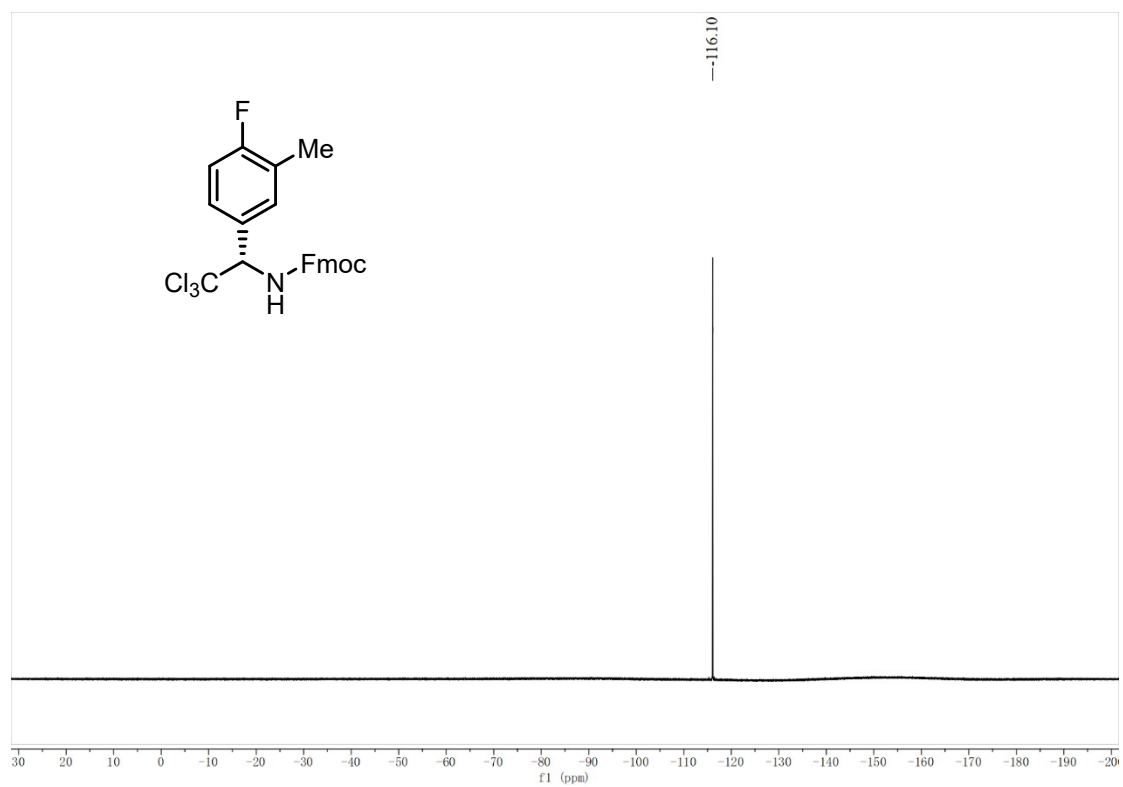

<sup>1</sup>H NMR of **3q** (600 MHz, CDCl<sub>3</sub>)

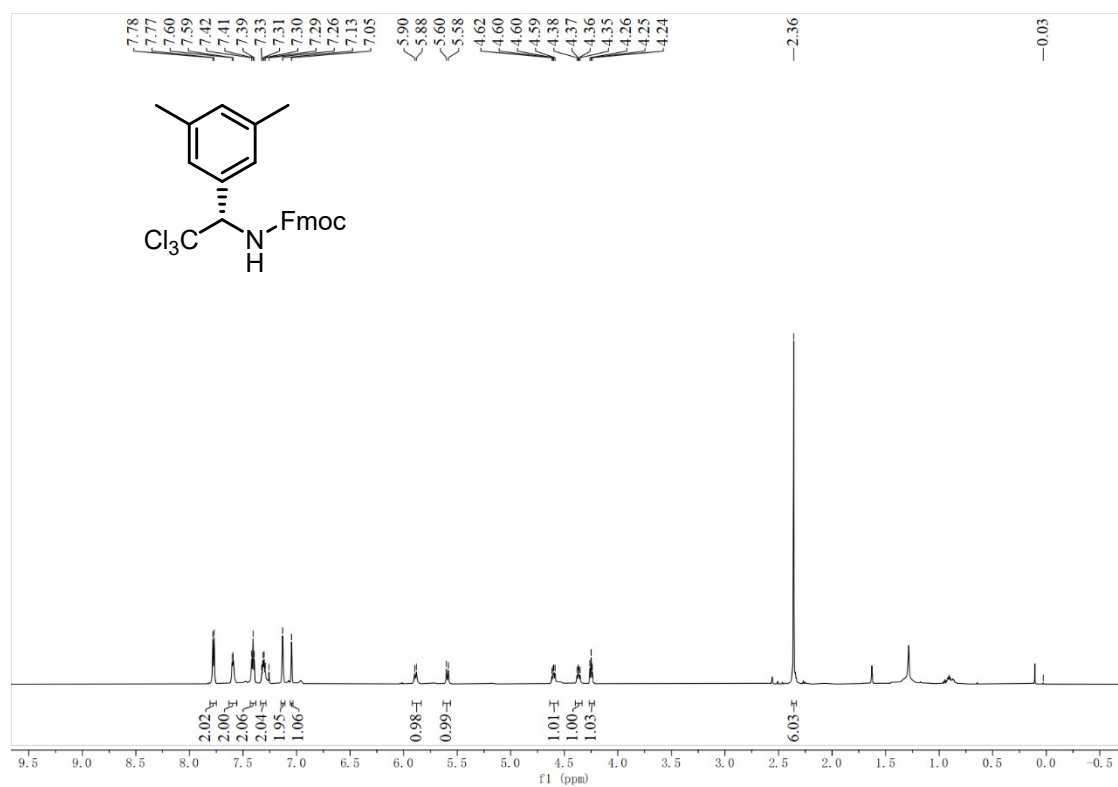

<sup>13</sup>C NMR of **3q** (101 MHz, CDCl<sub>3</sub>)

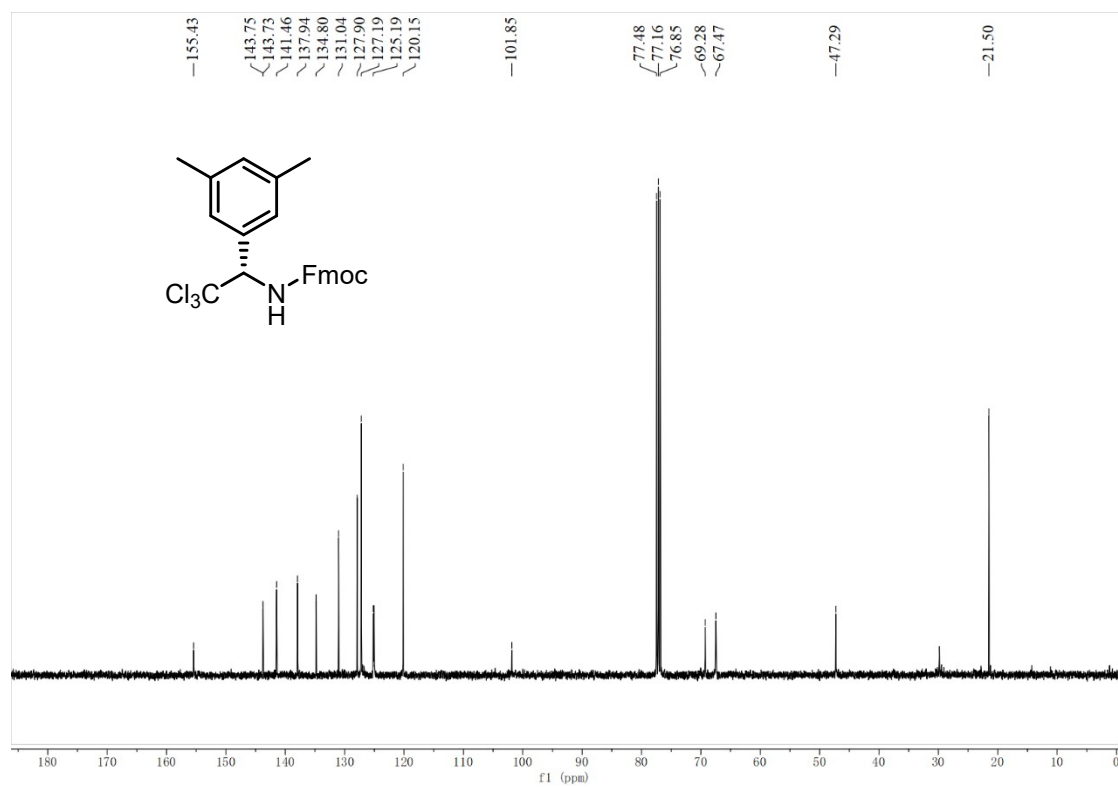



<sup>1</sup>H NMR of **3r** (600 MHz, CDCl<sub>3</sub>)

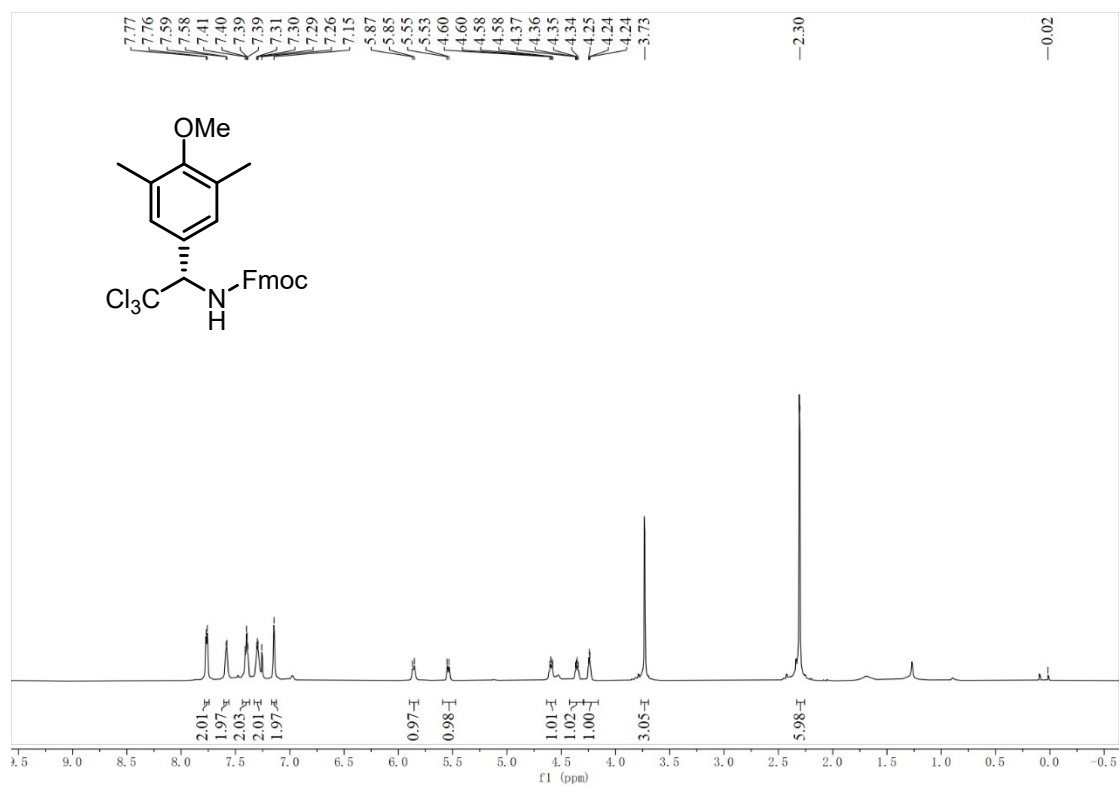

<sup>13</sup>C NMR of **3r** (101 MHz, CDCl<sub>3</sub>)

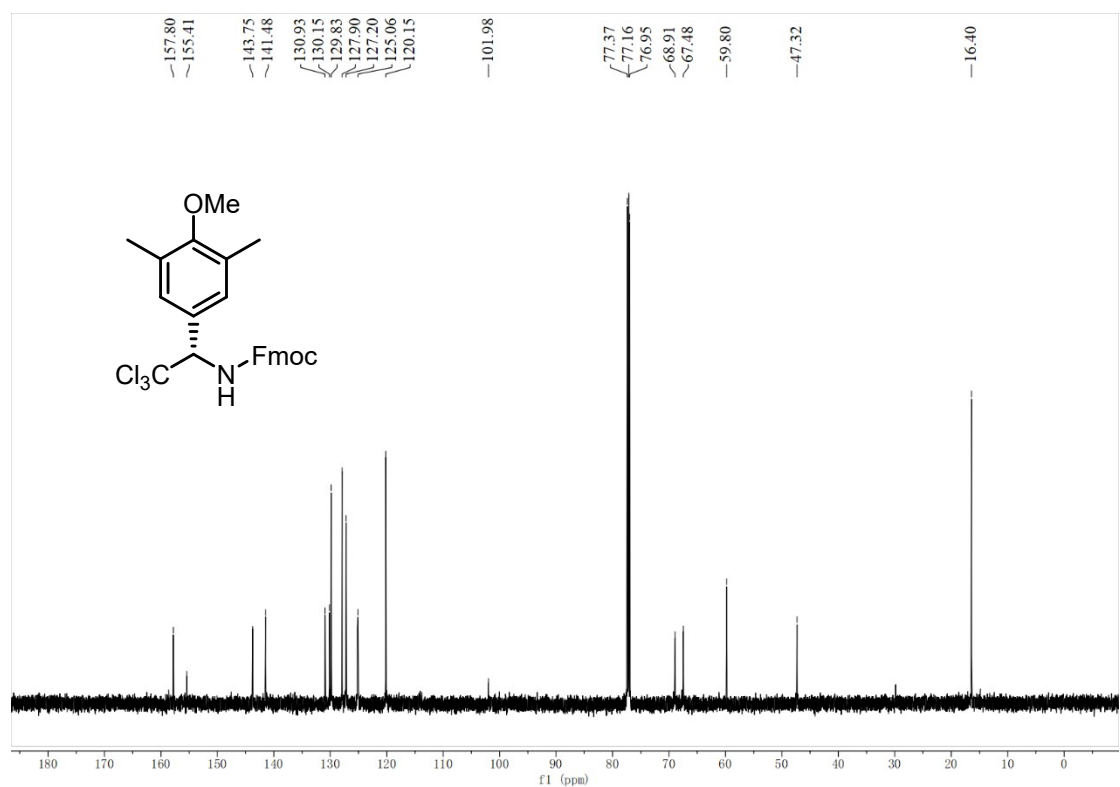

$^1\text{H}$  NMR of **3s** (600 MHz,  $\text{CDCl}_3$ )

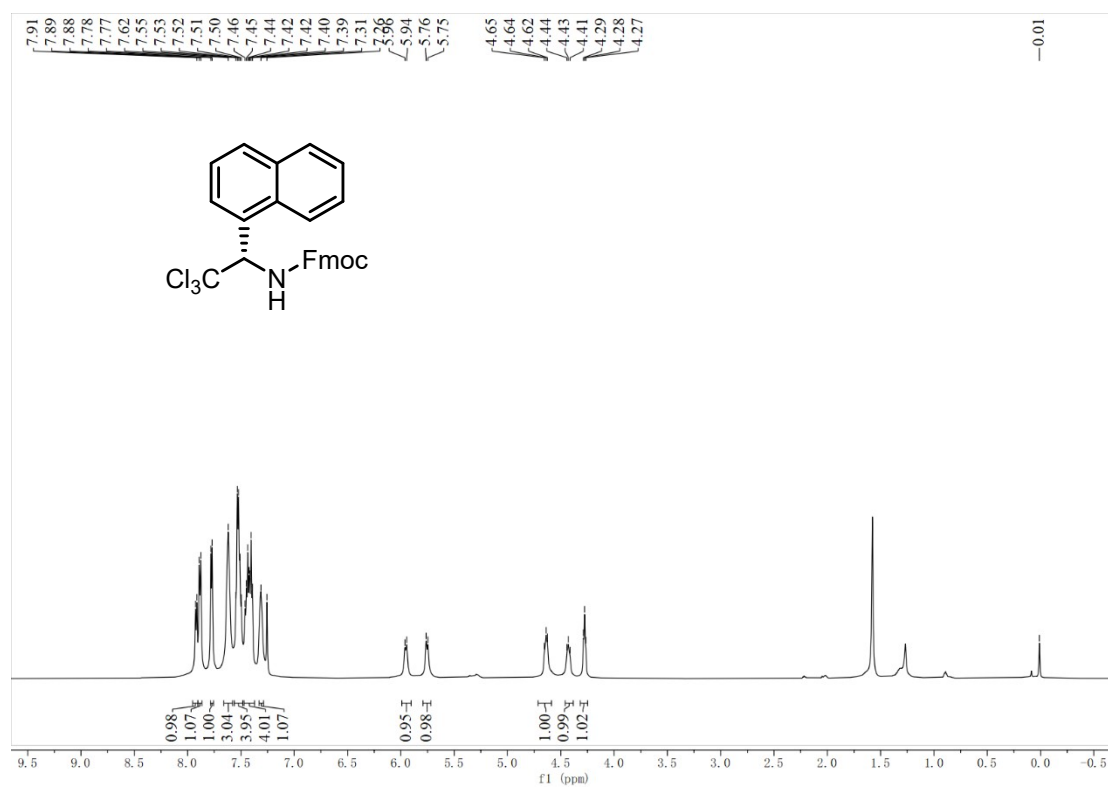

$^{13}\text{C}$  NMR of **3s** (151 MHz,  $\text{CDCl}_3$ )

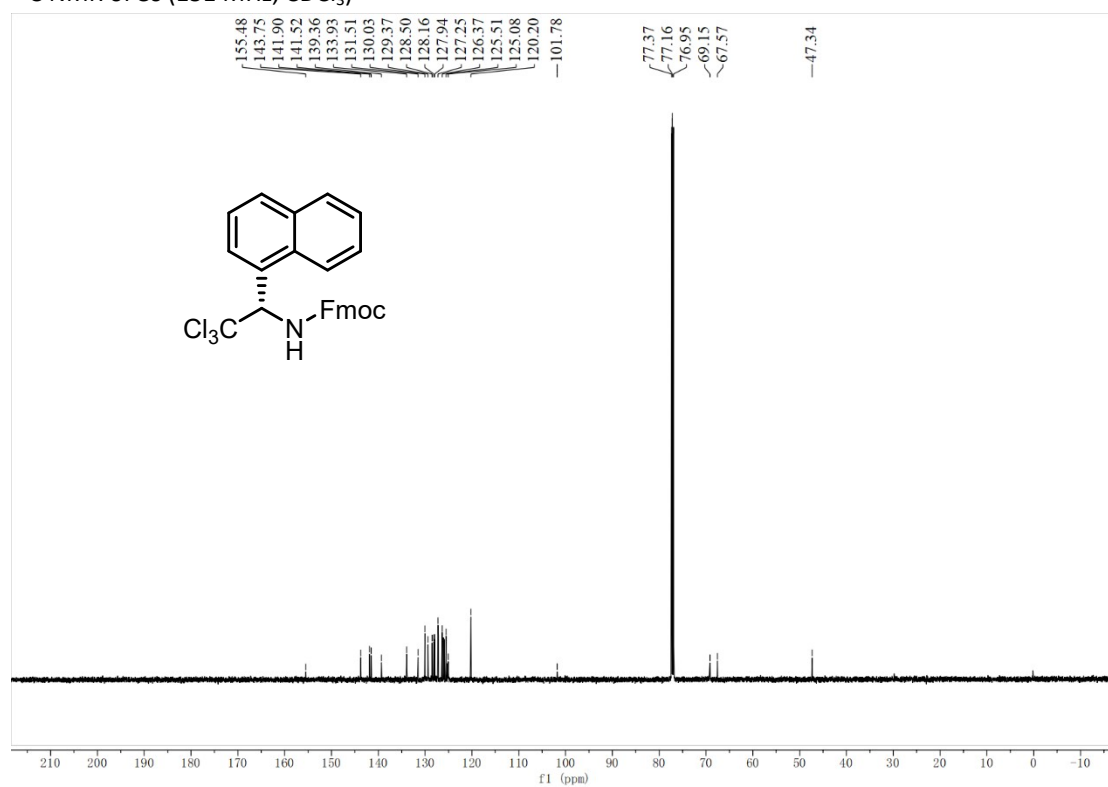

<sup>1</sup>H NMR of **3t** (600 MHz, CDCl<sub>3</sub>)

7.99, 7.87, 7.86, 7.76, 7.75, 7.62, 7.61, 7.39, 7.35, 7.39, 7.37, 7.29, 7.26, 6.03, 5.84, 5.83, 4.62, 4.61, 4.59, 4.42, 4.41, 4.39, 4.25, 4.24, 4.23

—0.02

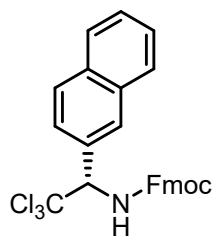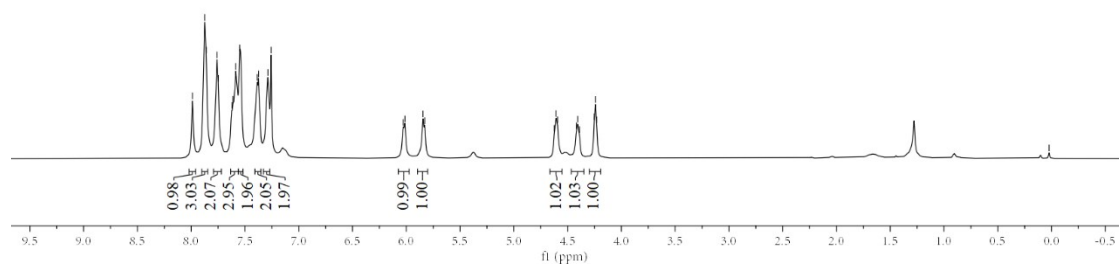

<sup>13</sup>C NMR of **3t** (151 MHz, CDCl<sub>3</sub>)

155.47, 143.67, 141.45, 133.52, 132.76, 132.26, 129.50, 128.43, 128.08, 127.90, 127.80, 127.22, 127.11, 126.74, 126.18, 125.14, 120.15, 101.80, 77.37, 77.16, 76.95, 69.45, 67.48, 47.30

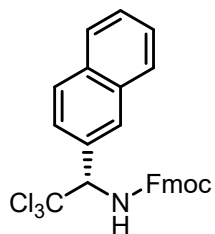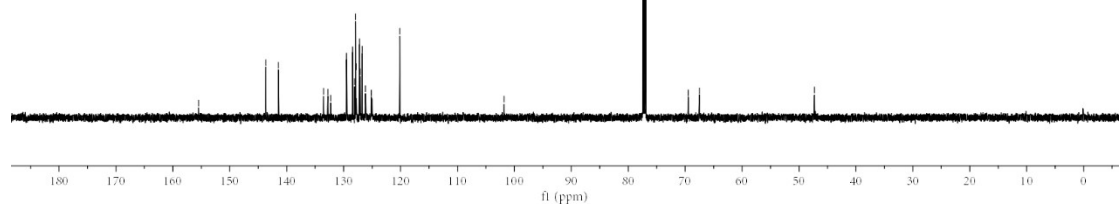

<sup>1</sup>H NMR of **3u** (600 MHz, CDCl<sub>3</sub>)

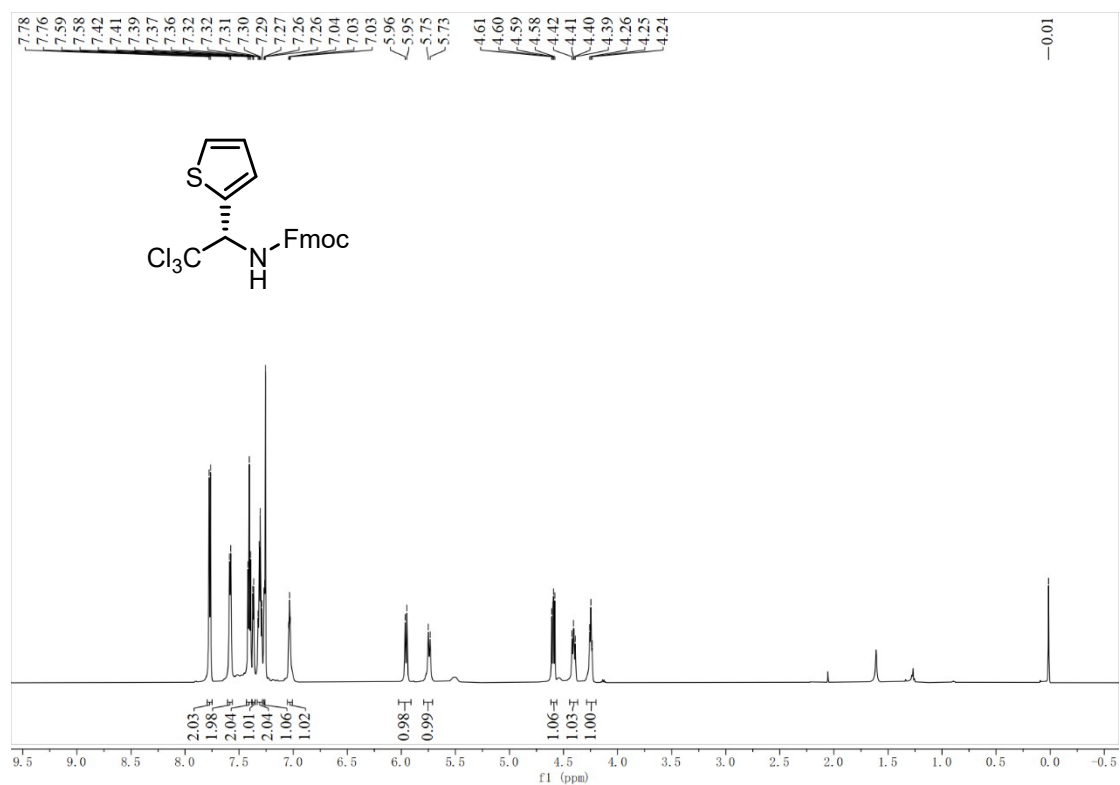

<sup>13</sup>C NMR of **3u** (151 MHz, CDCl<sub>3</sub>)

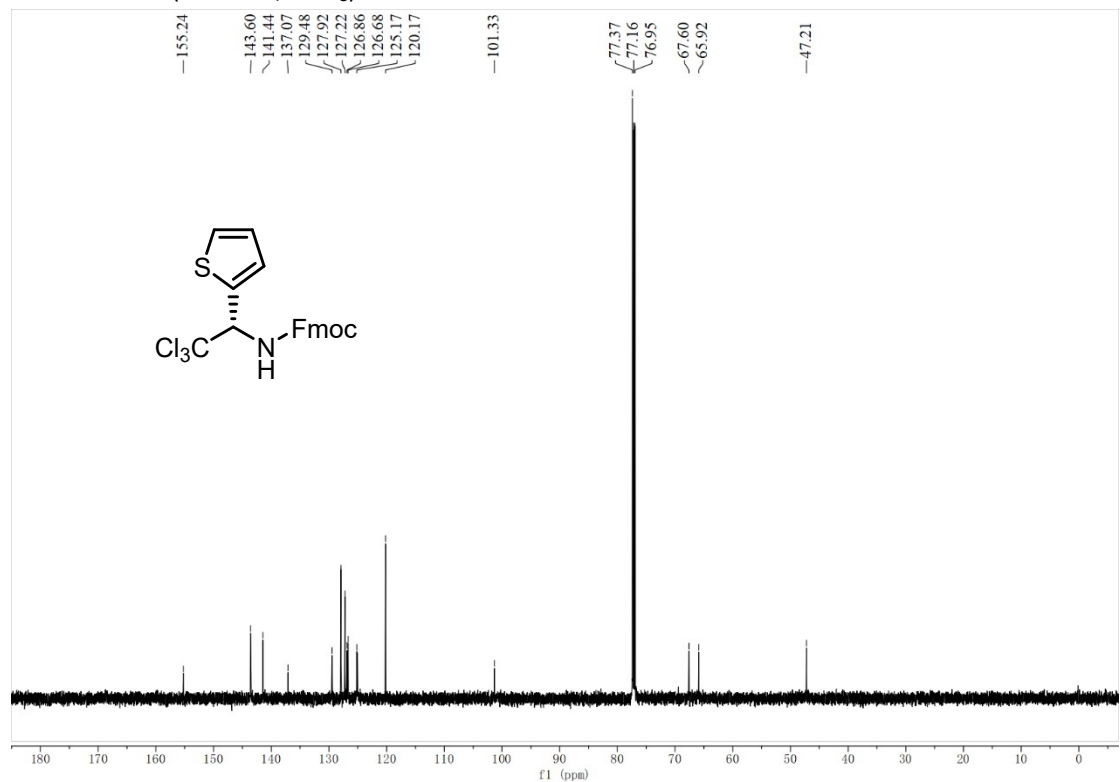

<sup>1</sup>H NMR of **3v** (600 MHz, CDCl<sub>3</sub>)

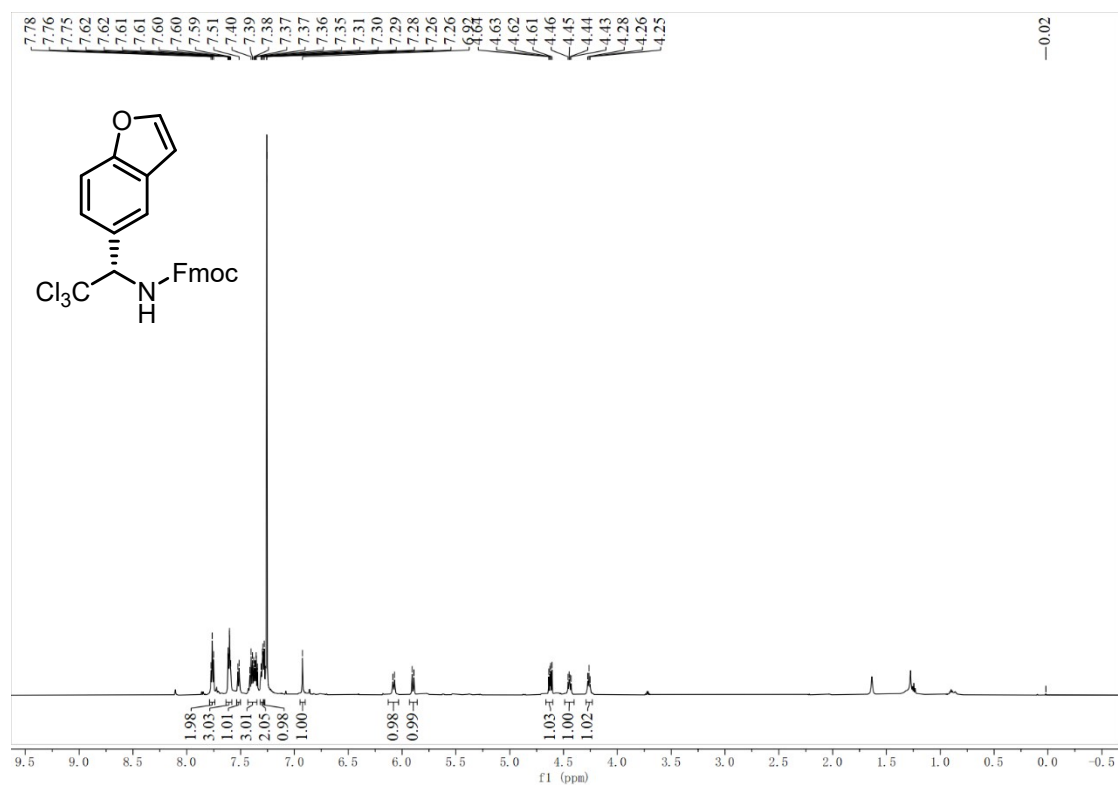

<sup>13</sup>C NMR of **3v** (151 MHz, CDCl<sub>3</sub>)

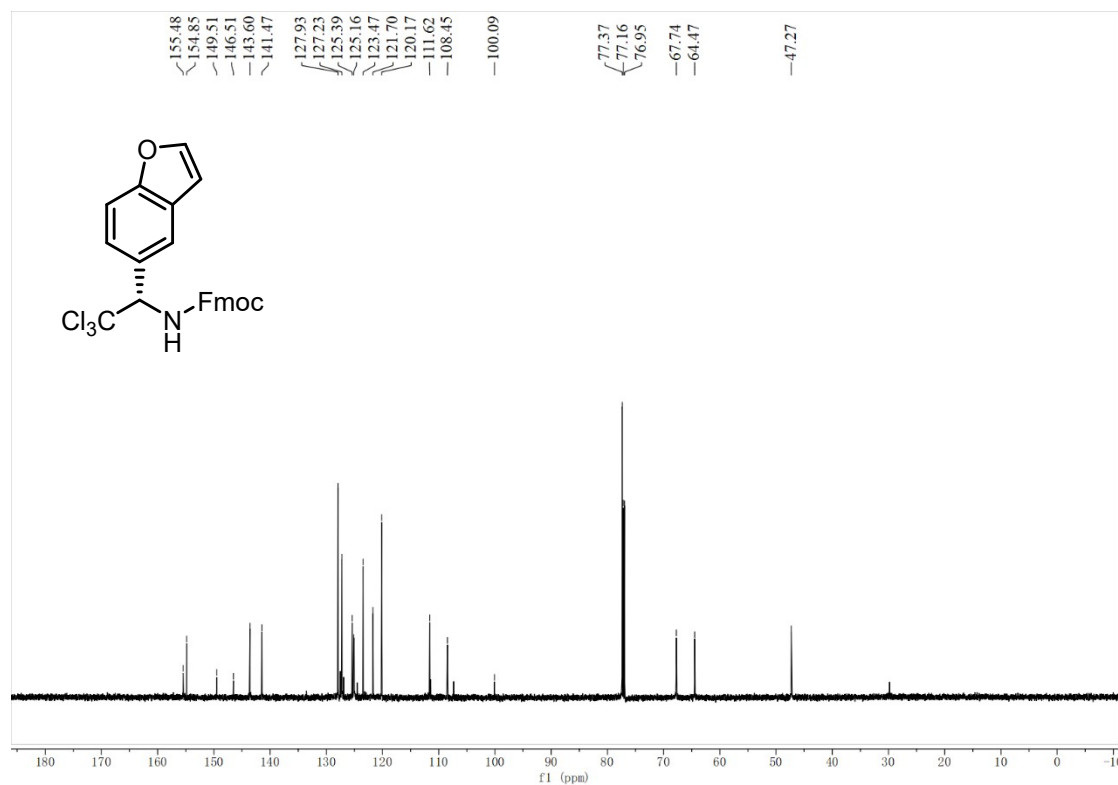



<sup>1</sup>H NMR of **3aa** (600 MHz, CDCl<sub>3</sub>)

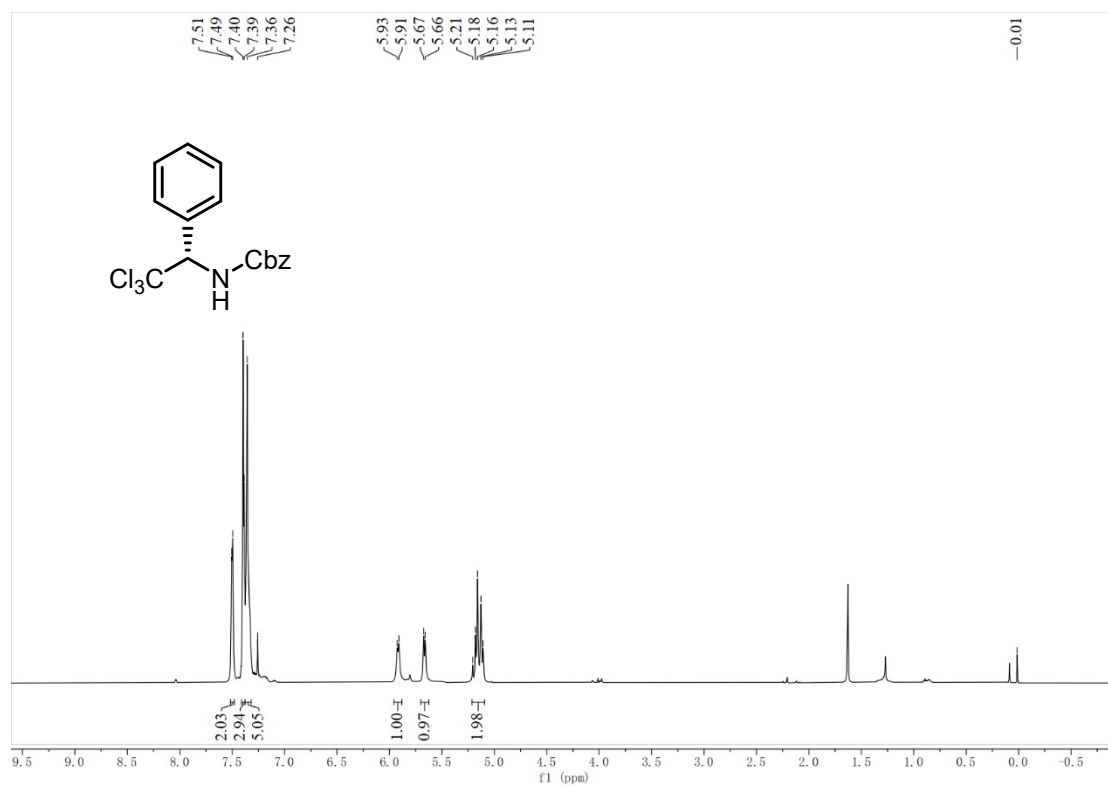

<sup>13</sup>C NMR of **3aa** (151 MHz, CDCl<sub>3</sub>)

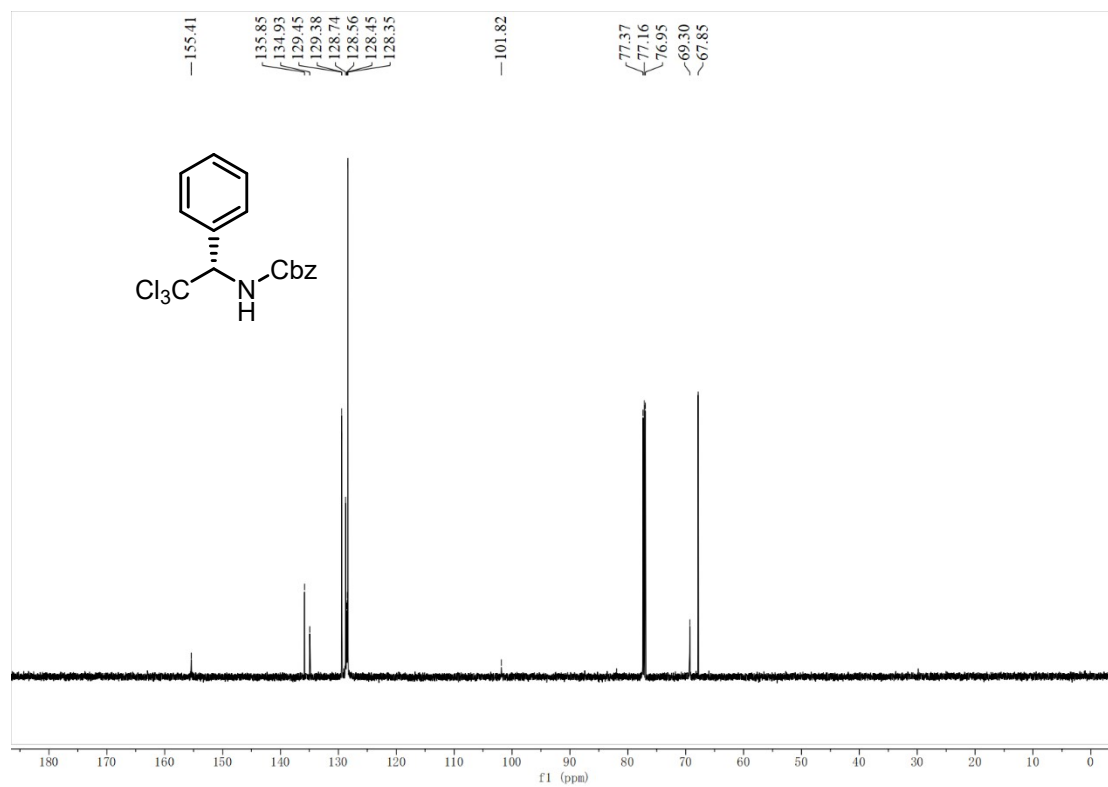

<sup>1</sup>H NMR of **3ab** (600 MHz, CDCl<sub>3</sub>)

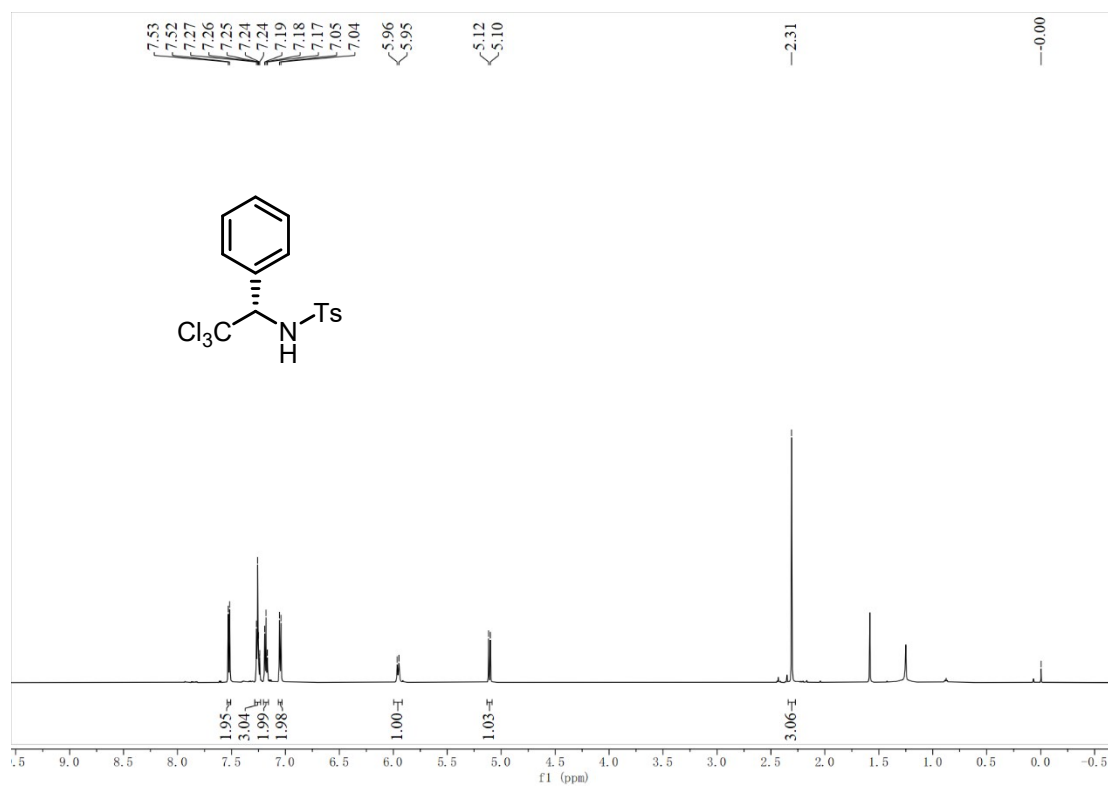

<sup>13</sup>C NMR of **3ab** (101 MHz, CDCl<sub>3</sub>)

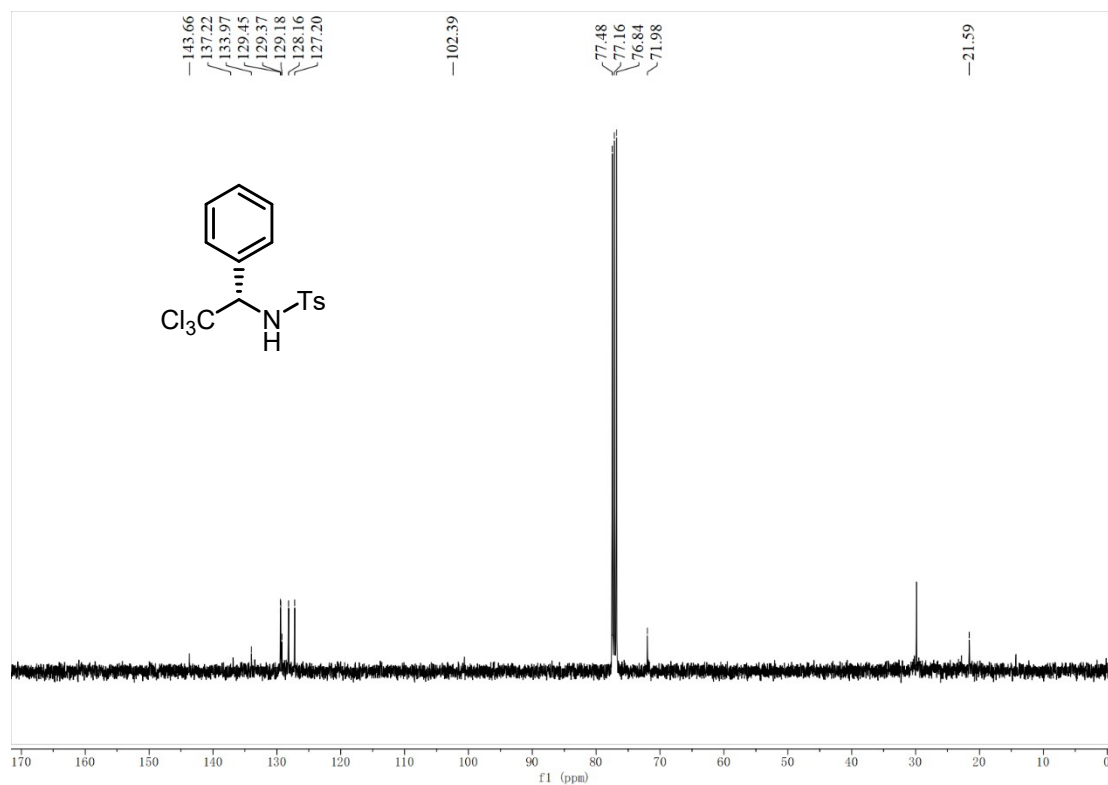



$^1\text{H}$  NMR of **3ac** (600 MHz,  $\text{CDCl}_3$ )

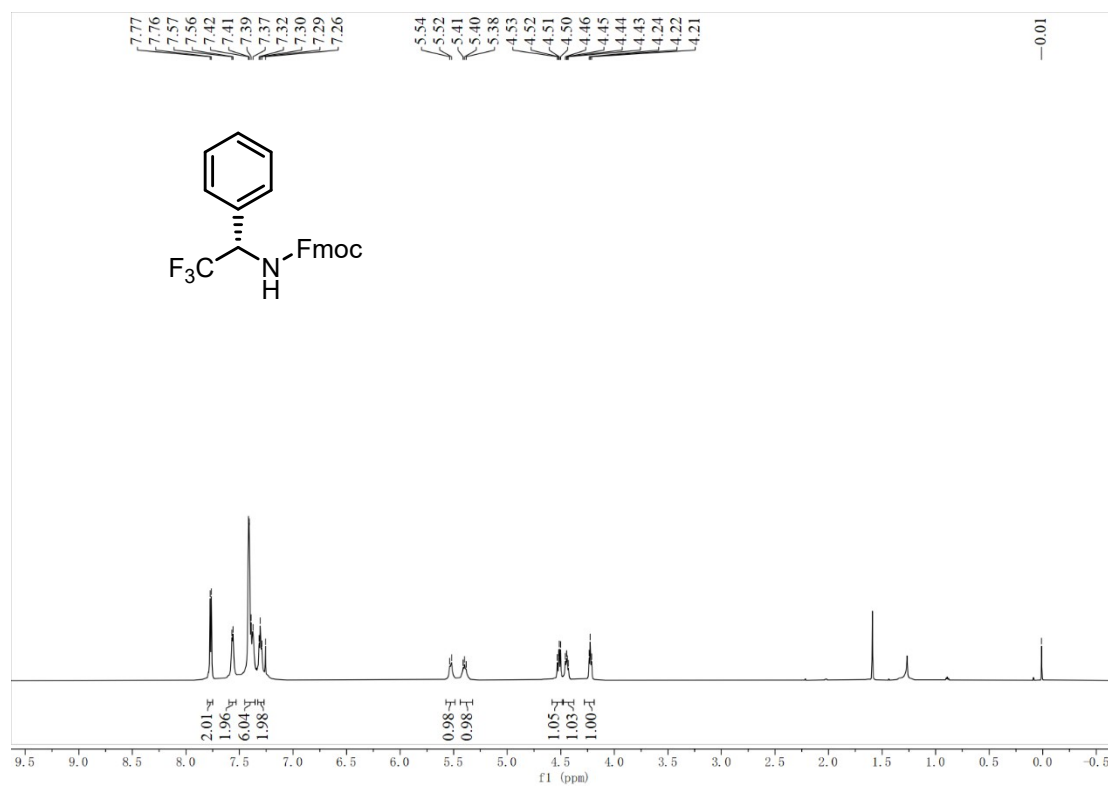

$^{13}\text{C}$  NMR of **3ac** (151 MHz,  $\text{CDCl}_3$ )

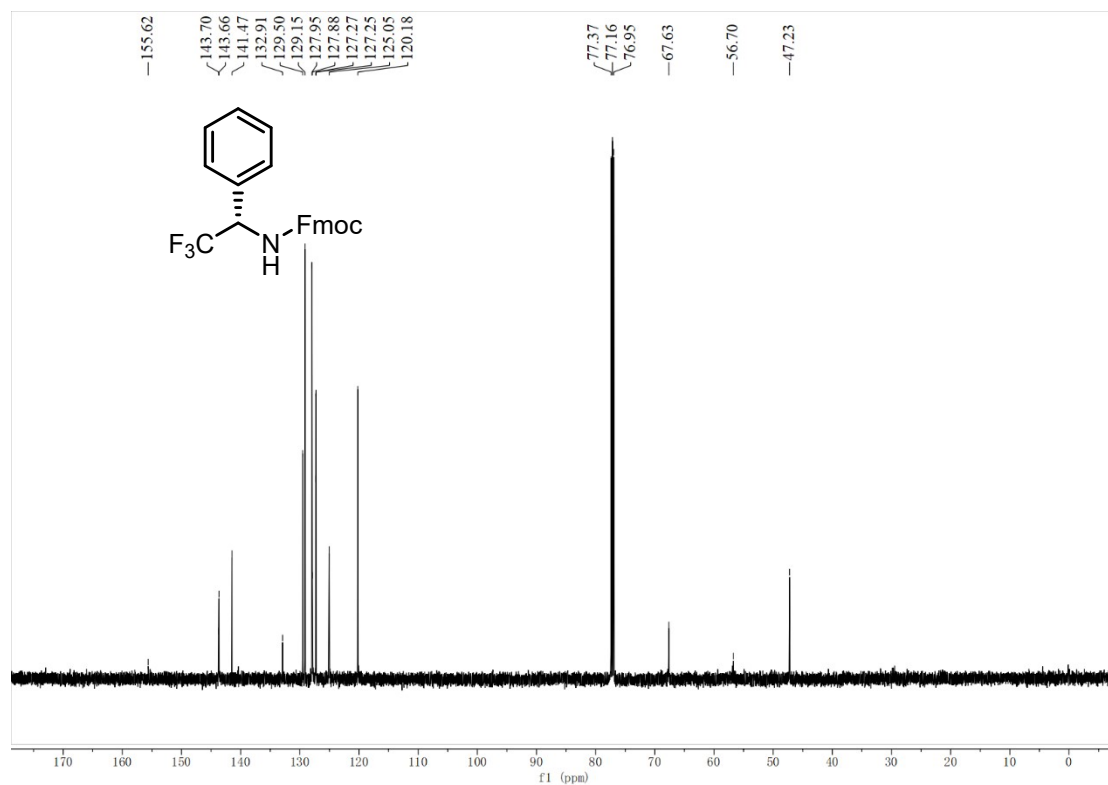

<sup>19</sup>F NMR of **3ac** (564 MHz, CDCl<sub>3</sub>)

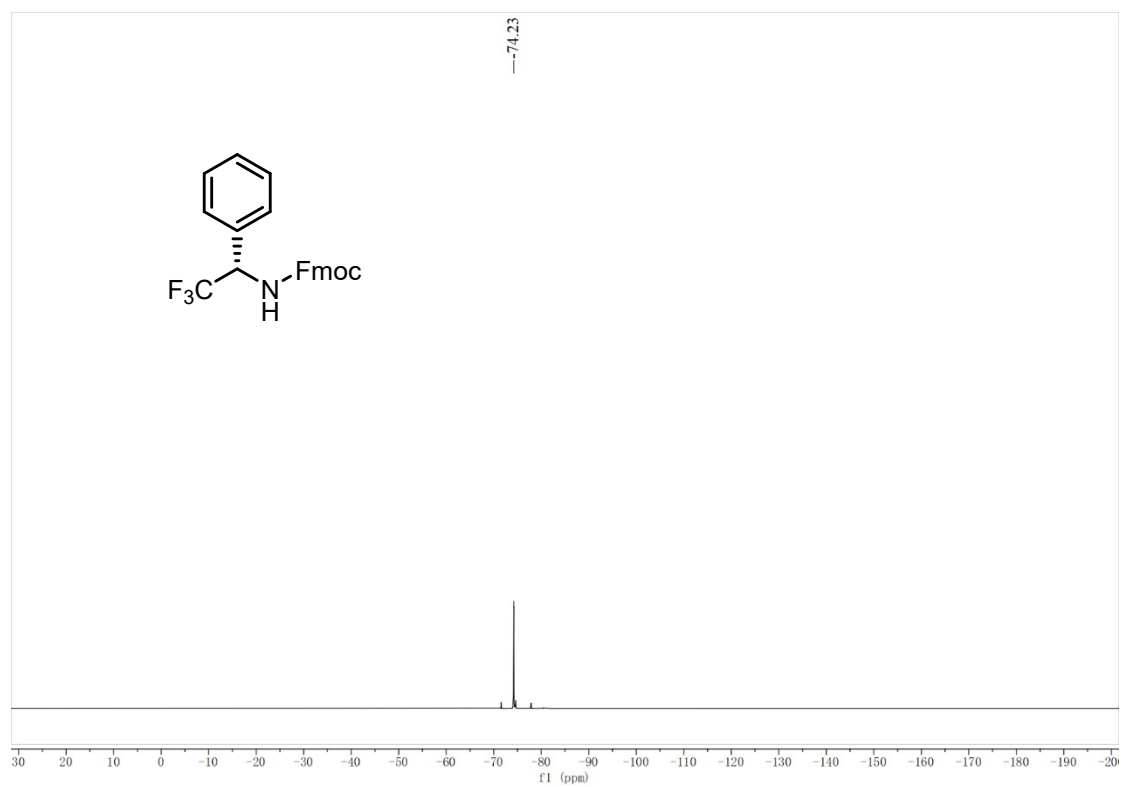

<sup>1</sup>H NMR of **3ad** (600 MHz, CDCl<sub>3</sub>)

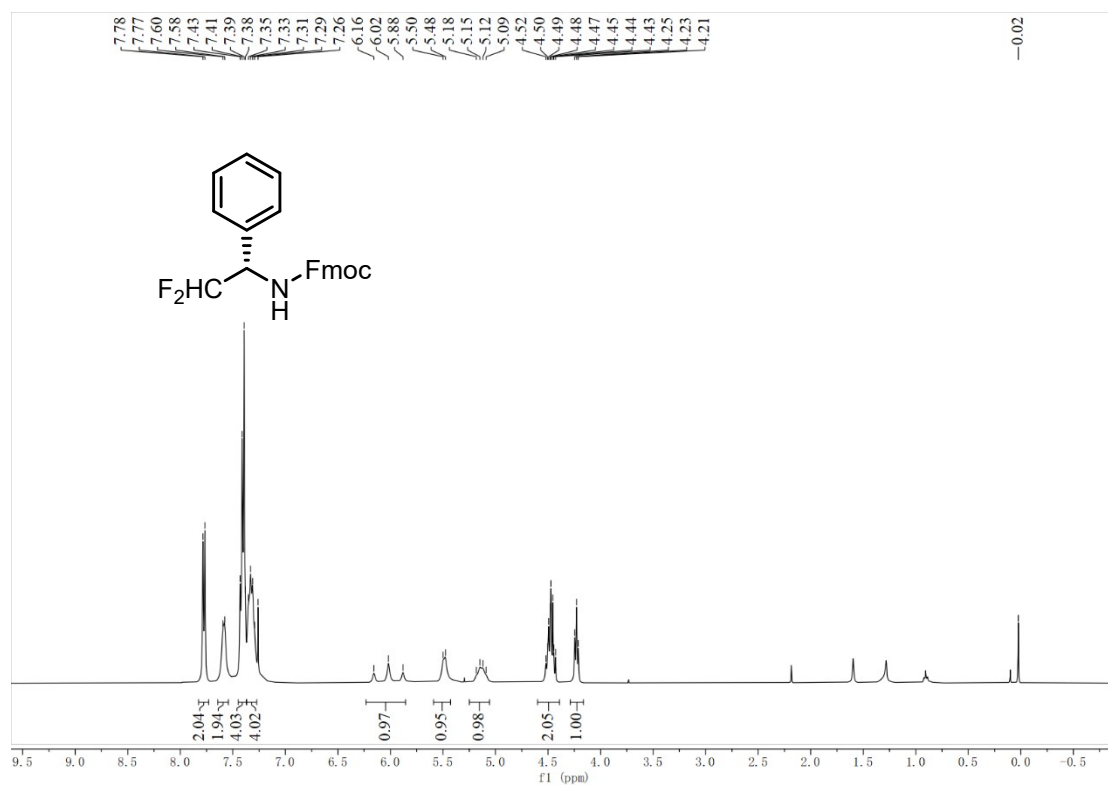

<sup>13</sup>C NMR of **3ad** (151 MHz, CDCl<sub>3</sub>)

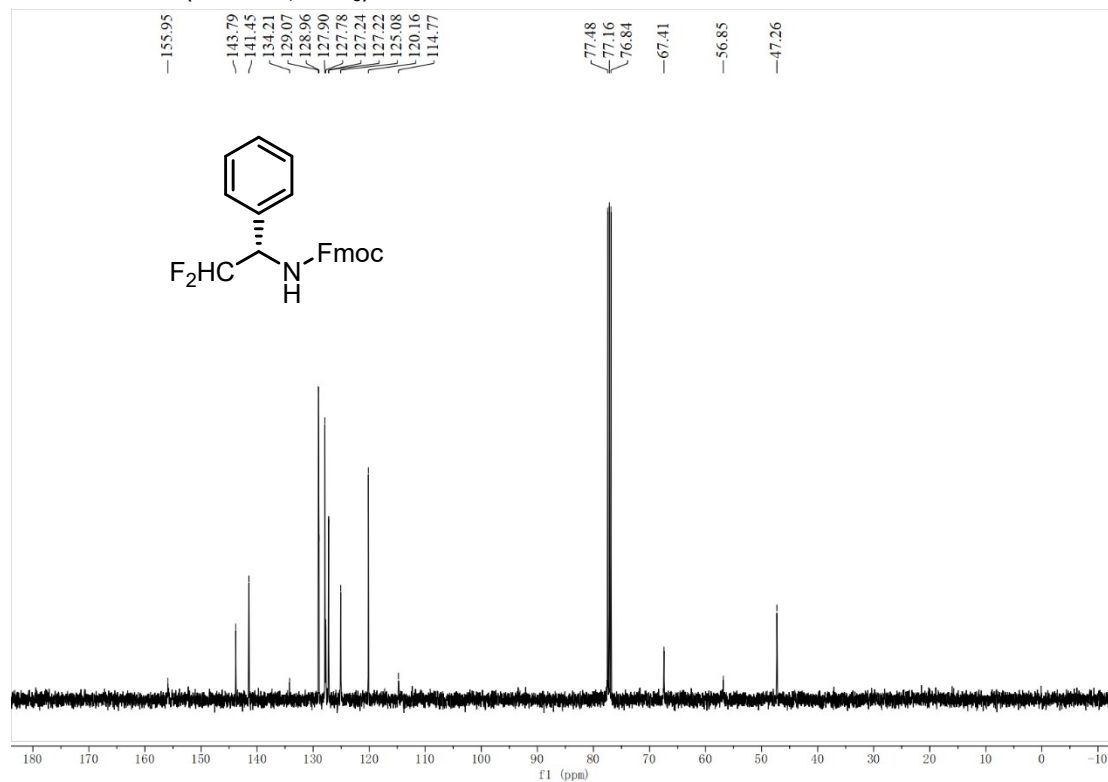

$^{19}\text{F}$  NMR of **3ad** (376 MHz,  $\text{CDCl}_3$ )

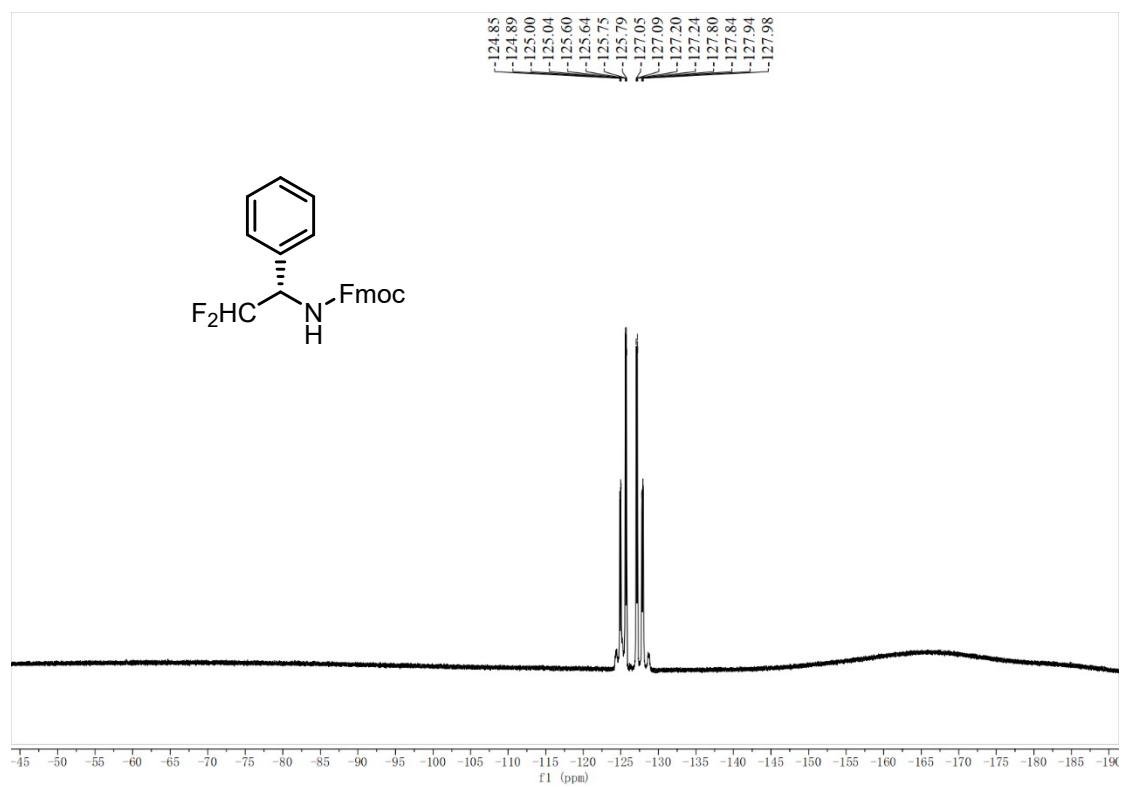

$^1\text{H}$  NMR of **1b'** (600 MHz,  $\text{CDCl}_3$ )

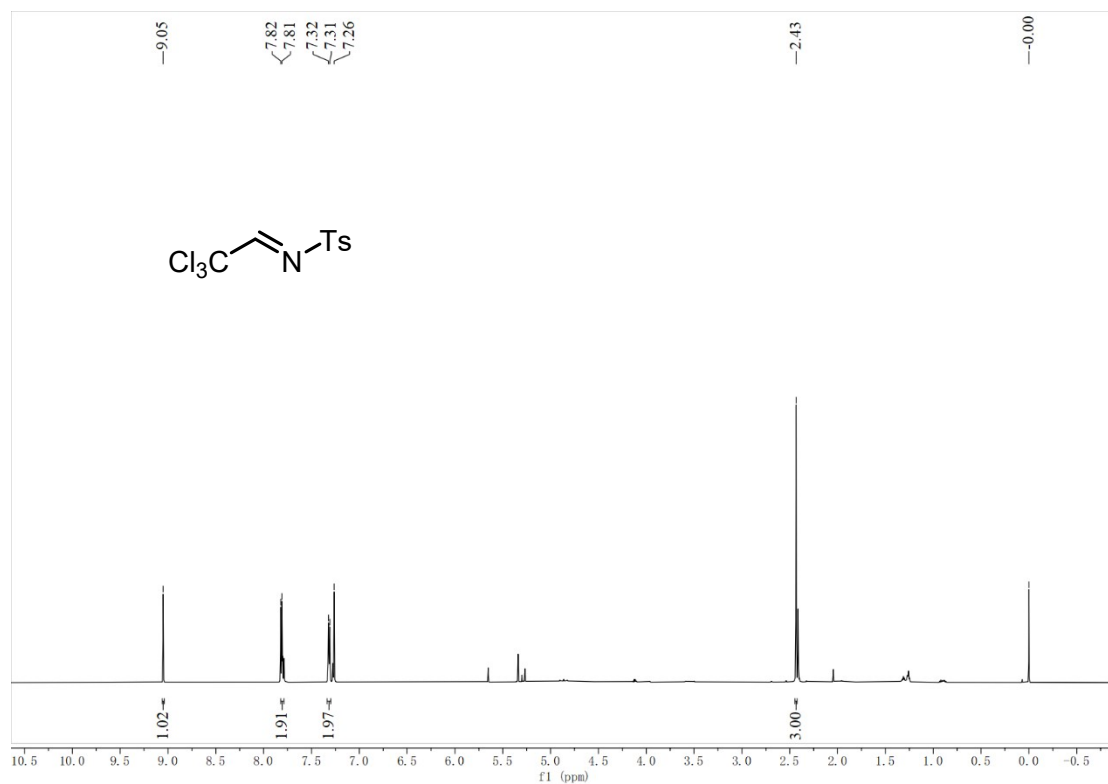

$^{13}\text{C}$  NMR of **1b'** (151 MHz,  $\text{CDCl}_3$ )

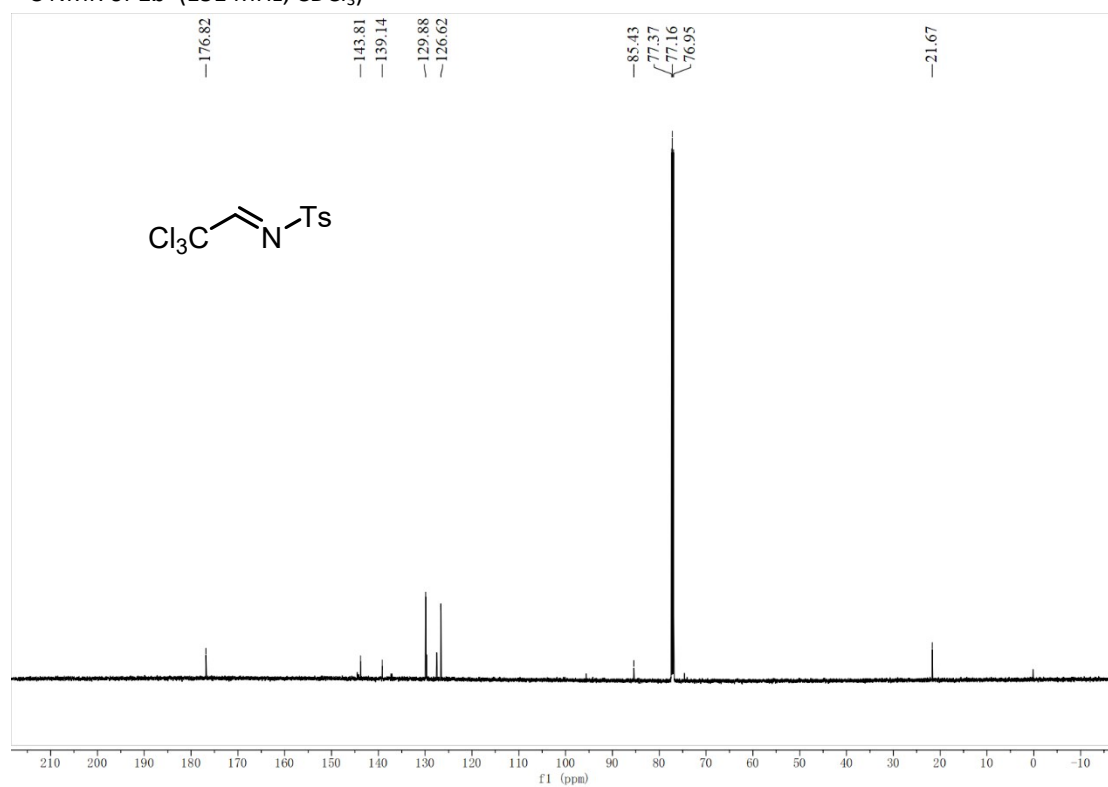

$^1\text{H}$  NMR of **4** (600 MHz,  $\text{CDCl}_3$ )

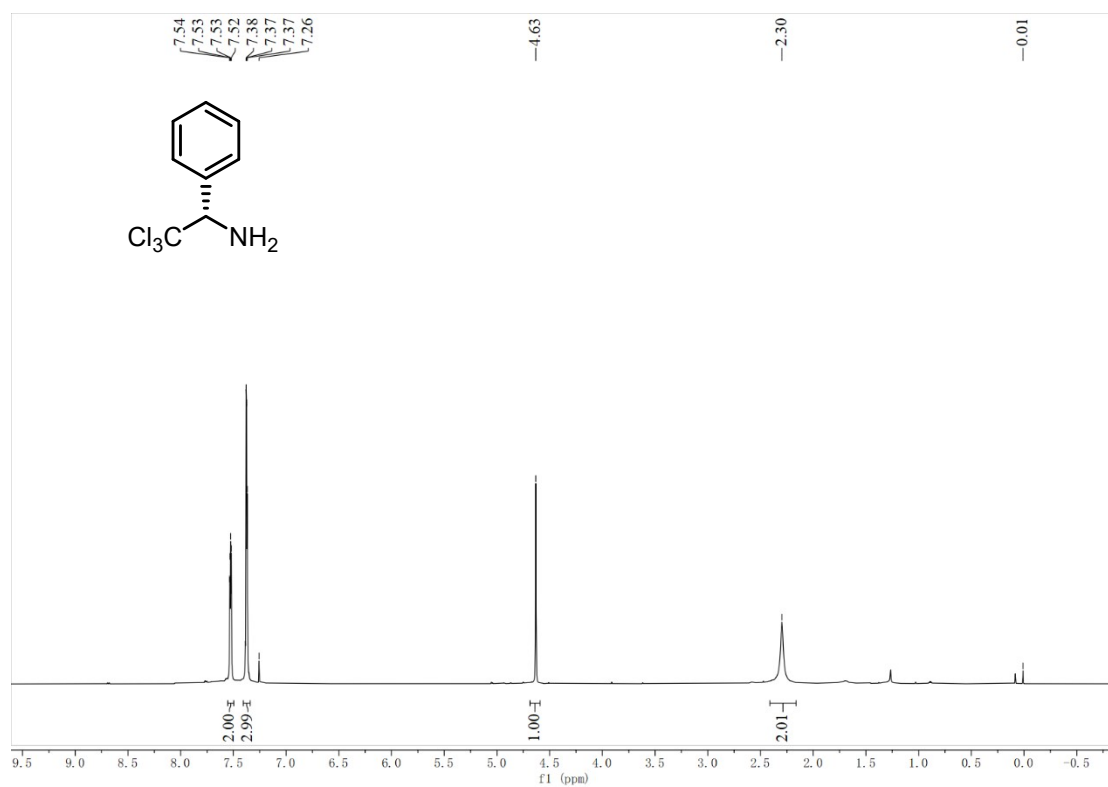

$^{13}\text{C}$  NMR of **4** (151 MHz,  $\text{CDCl}_3$ )

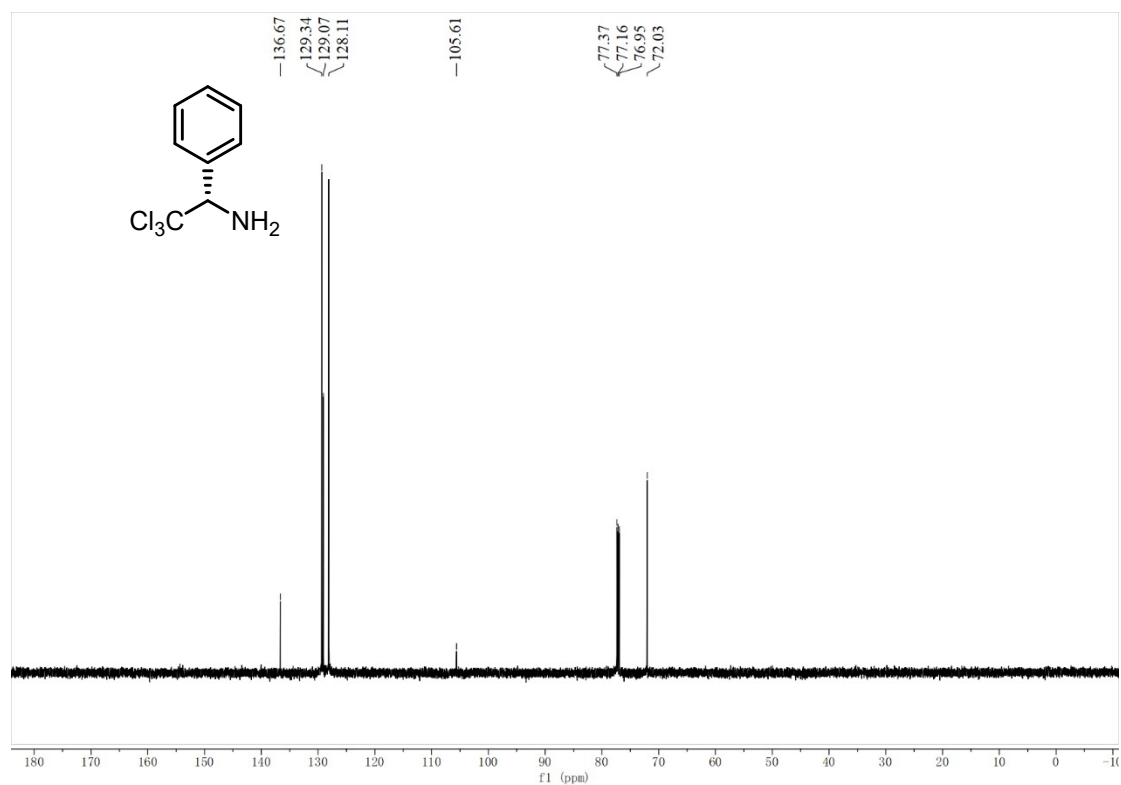

<sup>1</sup>H NMR of **6** (600 MHz, CDCl<sub>3</sub>)

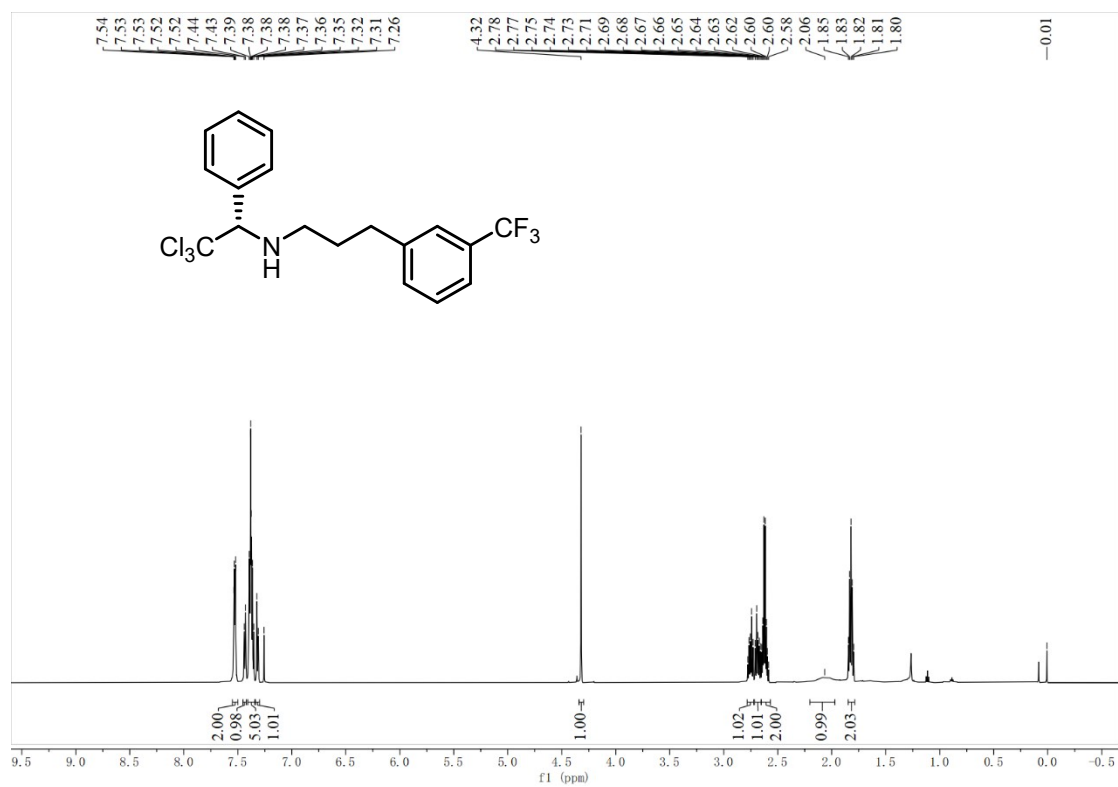

<sup>13</sup>C NMR of **6** (151 MHz, CDCl<sub>3</sub>)

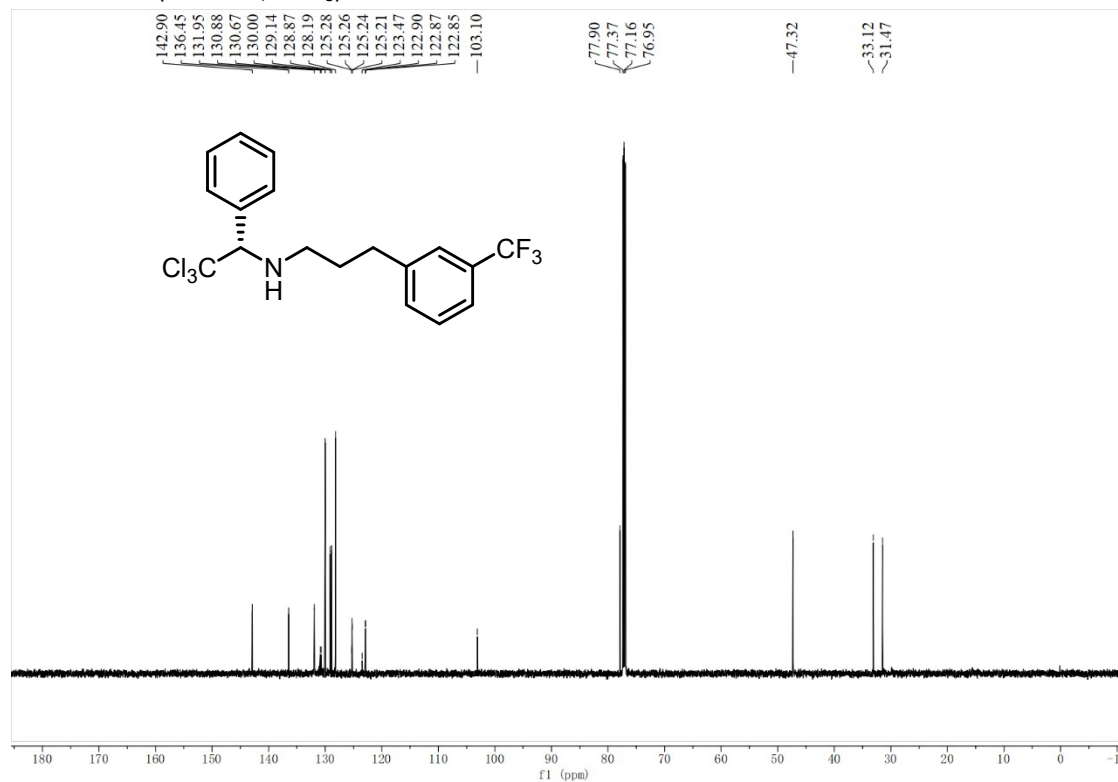

<sup>19</sup>F NMR of **6** (376 MHz, CDCl<sub>3</sub>)

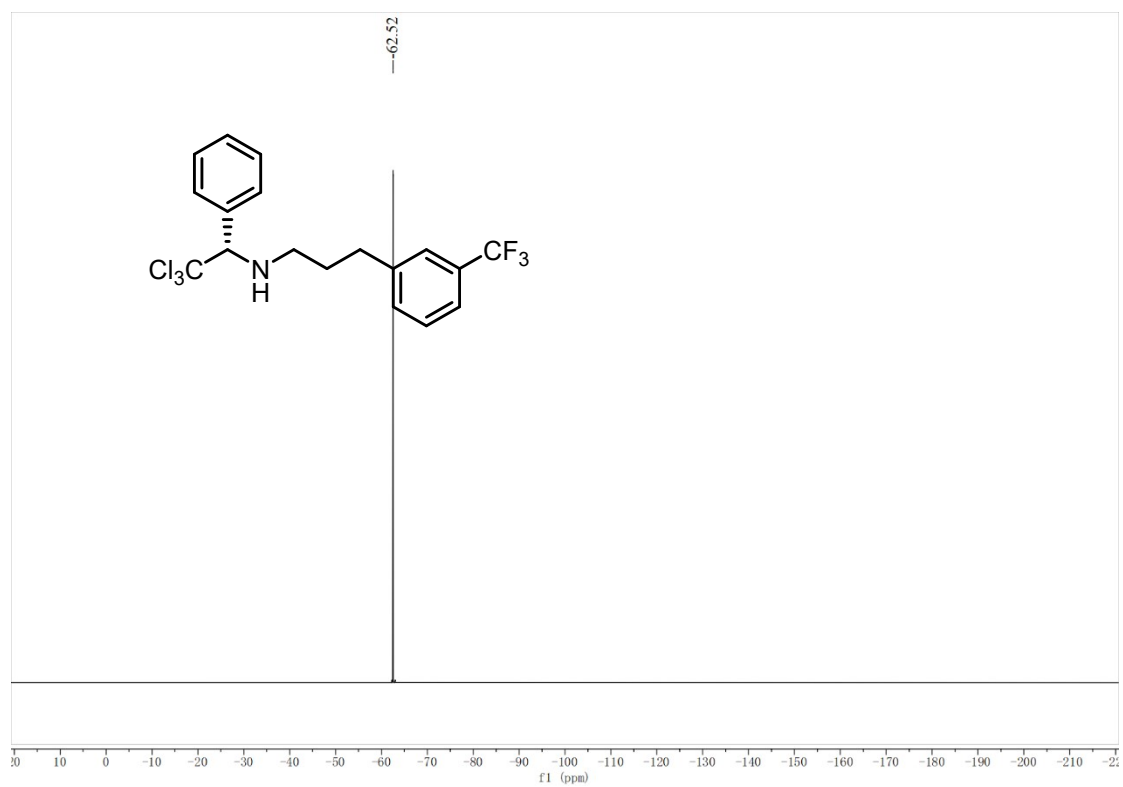

Supplement: d4cc00022f1.pdf [file d4cc00022f1.pdf]
